# Supplementary material for: In situ probing of the present-day zircon-bearing magma chamber at Krafla, Northeastern Iceland
Source: Frontiers journal article supplement (doi:10.3389/feart.2023.1307303), 2023-11-16
Supplement: Table_1.XLSX [file Table_1.XLSX]

## Sheet: Table S1 EPMA (USA-France)
IDDP-1 zircon compositions by EPMA (USA-France)
SAMPLE IDDP-1	NUMBER	TAKEOFF	KILOVOLT	CURRENT	BEAMSIZE	LINE	Rel Distance	Ti WT%	Zr WT%	Zr, corr	Si WT%	Al WT%	Mg WT%	Fe WT%	Ca WT%	Na WT%	K WT%	O WT%	TOTAL	TiO2	ZrO2	SiO2	Al2O3	MgO	FeO	CaO	Na2O	K2O	O	TOTAL	Ti CDL99	Zr CDL99	Si CDL99	Al CDL99	Mg CDL99	Fe CDL99	Ca CDL99	Na CDL99	K CDL99	TiO2 CDL99	ZrO2 CDL99	SiO2 CDL99	Al2O3 CDL99	MgO CDL99	FeO CDL99	CaO CDL99	Na2O CDL99	K2O CDL99	X-POS
zircon blank	3	40	15	50	3	139	0	-0.00019	49.9205		16.0309	0.00496	0.002814	0.005239	0.03207	-0.03865	0.016298	35.7874	101.761	-0.00032	67.4327	34.2958	0.009371	0.004667	0.00674	0.044873	-0.0521	0.019632	8e-06	101.761	0.006188	0.00963	0.008978	0.007497	0.010072	0.031844	0.028449	0	0	0.010322	0.013008	0.019206	0.014166	0.016702	0.040967	0.039806	0	0	-7693
zircon blank	3	40	15	50	3	140	13	-0.00087	49.9243		15.9895	0.002493	0.006873	-0.01046	-0.01433	-0.06314	0	35.7066	101.541	-0.00145	67.4377	34.2072	0.00471	0.011398	-0.01345	-0.02005	-0.08511	0	4e-06	101.541	0.006303	0.009669	0.009051	0.00773	0.009985	0.033247	0.036252	0	0	0.010513	0.01306	0.019364	0.014605	0.016559	0.042773	0.050724	0	0	-7680
zircon blank	3	40	15	50	3	141	21	0.002296	49.9895		16.0655	0.003532	0.007631	0.037653	0.005602	-0.04156	0.019414	35.853	101.943	0.00383	67.5258	34.3699	0.006674	0.012655	0.04844	0.007839	-0.05602	0.023386	0	101.943	0.00625	0.009621	0.009001	0.00759	0.010032	0.029211	0.032258	0	0	0.010425	0.012996	0.019256	0.014341	0.016636	0.03758	0.045136	0	0	-7672
zircon blank	3	40	15	50	3	142	29	0.003311	49.9953		16.067	0.003786	0.010125	-0.00829	0.009218	-0.03785	0.007797	35.8464	101.897	0.005523	67.5337	34.373	0.007153	0.01679	-0.01067	0.012898	-0.05102	0.009392	4e-06	101.897	0.006196	0.009791	0.00904	0.007541	0.009712	0.032369	0.035693	0	0	0.010336	0.013225	0.01934	0.014249	0.016105	0.041642	0.049941	0	0	-7664
zircon blank	3	40	15	50	3	143	41	-0.00454	50.0781		16.0018	-0.00561	0.00655	-0.01981	0.035124	-0.03979	0	35.7899	101.842	-0.00758	67.6455	34.2335	-0.0106	0.010862	-0.02548	0.049145	-0.05364	0	4e-06	101.842	0.006306	0.009687	0.009012	0.007865	0.00999	0.031618	0.027722	0	0	0.010519	0.013086	0.019281	0.01486	0.016567	0.040677	0.038788	0	0	-7652
zircon-1 core	4	40	15	50	3	144	0	0.018506	48.4107		15.5932	0.005089	0.016348	0.396451	-0.03059	-0.05306	0.021006	34.8636	99.2413	0.030868	65.3932	33.3594	0.009615	0.02711	0.510033	-0.0428	-0.07153	0.025304	0	99.2413	0.006219	0.009651	0.009227	0.007736	0.009823	0.031386	0.042619	0	0	0.010373	0.013037	0.019739	0.014616	0.016289	0.040378	0.059633	0	0	-8809
zircon-1 core	4	40	15	50	3	145	4	0.026838	47.963		15.5741	0.002891	0.011229	0.376746	-0.00512	-0.008	0	34.7008	98.6425	0.044768	64.7884	33.3185	0.005463	0.01862	0.484683	-0.00716	-0.01078	0	4e-06	98.6425	0.006158	0.009749	0.009238	0.0077	0.010096	0.031595	0.039872	0	0	0.010272	0.013168	0.019764	0.014549	0.016743	0.040647	0.055789	0	0	-8805
zircon-1 core	4	40	15	50	3	146	12.2462	0.021941	47.7322		15.5861	0.012678	-0.00226	0.459031	0.037431	-0.03048	0.003406	34.6636	98.4837	0.036599	64.4767	33.3443	0.023956	-0.00374	0.590542	0.052374	-0.04108	0.004102	-1e-05	98.4837	0.006104	0.009693	0.009304	0.008077	0.010306	0.033021	0.030072	0	0	0.010181	0.013093	0.019905	0.015262	0.017091	0.042482	0.042076	0	0	-8797
zircon-1 core	4	40	15	50	3	147	14.2462	0.021408	47.8855		15.5585	0.003388	0.010178	0.397259	0.016542	-0.00451	0.023961	34.6727	98.5848	0.035709	64.6837	33.2851	0.006402	0.016878	0.511073	0.023146	-0.00608	0.028864	0	98.5848	0.006132	0.009574	0.00923	0.007981	0.009889	0.031214	0.034967	0	0	0.010229	0.012932	0.019745	0.015081	0.016399	0.040156	0.048926	0	0	-8797
zircon-1 core	4	40	15	50	3	148	19.2462	0.020048	47.4877		15.5528	0.000987	0.011877	0.408857	0.017592	-0.01185	0	34.521	98.009	0.033442	64.1464	33.273	0.001866	0.019695	0.525993	0.024614	-0.01598	0	-1e-05	98.009	0.00621	0.009606	0.009538	0.007897	0.009942	0.032384	0.030785	0	0	0.010358	0.012975	0.020406	0.014922	0.016488	0.041662	0.043074	0	0	-8802
zircon-1 core	4	40	15	50	3	149	24.2462	0.019266	48.3469		15.6433	0.007808	0.004605	0.376834	0.017385	0.006394	0.010174	34.9255	99.3581	0.032136	65.307	33.4666	0.014753	0.007636	0.484796	0.024326	0.008618	0.012255	0	99.3581	0.006184	0.009662	0.009377	0.007853	0.010216	0.031263	0.036226	0	0	0.010315	0.013051	0.020061	0.014838	0.016941	0.04022	0.050688	0	0	-8807
zircon-1 rim	5	40	15	50	3	150	0	0.023429	48.3029		15.5682	0.004901	0.011188	0.434785	0.072024	-0.0588	0.016721	34.8461	99.2215	0.039081	65.2476	33.3061	0.00926	0.018554	0.55935	0.100777	-0.07926	0.020142	-1e-05	99.2215	0.006204	0.009741	0.009195	0.007648	0.00962	0.031047	0.021091	0	0	0.010349	0.013159	0.019672	0.01445	0.015953	0.039942	0.029511	0	0	-8828
zircon-1 rim	5	40	15	50	3	151	12.3693	0.021877	47.4728		15.428	0.008711	0.006552	0.393394	-0.01938	-0.01271	0.012311	34.3612	97.6727	0.036492	64.1262	33.006	0.016459	0.010865	0.5061	-0.02711	-0.01714	0.01483	4e-06	97.6727	0.006444	0.010099	0.00951	0.008011	0.010407	0.033315	0.043906	0	0	0.010749	0.013641	0.020346	0.015137	0.017259	0.04286	0.061433	0	0	-8825
zircon-1 rim	5	40	15	50	3	152	25.4077	0.02472	48.12		15.6251	0.004418	0.003385	0.4853	-0.03026	-0.00925	0.030173	34.8356	99.0892	0.041234	65.0005	33.4276	0.008347	0.005614	0.624337	-0.04234	-0.01247	0.036346	8e-06	99.0892	0.006195	0.009463	0.009124	0.007779	0.010063	0.029998	0.038278	0	0	0.010334	0.012783	0.01952	0.014698	0.016687	0.038593	0.053558	0	0	-8814
zircon-1 rim	5	40	15	50	3	153	60.6356	0.023163	47.67		15.5107	0.001097	0.009116	0.569776	0.016315	-0.03	0.000247	34.5767	98.3472	0.038637	64.3927	33.183	0.002072	0.015117	0.733015	0.022827	-0.04045	0.000298	8e-06	98.3472	0.006533	0.010099	0.009597	0.008165	0.010216	0.032865	0.034678	0	0	0.010897	0.013641	0.020531	0.015427	0.016942	0.042281	0.048521	0	0	-8818
zircon-1 rim	5	40	15	50	3	154	85.3742	0.027322	48.2533		15.6637	0.002949	0.013782	0.670735	0.015138	-0.00914	0.000214	34.9989	99.6369	0.045574	65.1806	33.5103	0.005572	0.022854	0.862899	0.021181	-0.01232	0.000258	4e-06	99.6369	0.006304	0.00972	0.009364	0.007872	0.009883	0.032599	0.037303	0	0	0.010515	0.013129	0.020032	0.014874	0.016389	0.041938	0.052195	0	0	-8794
zircon-1 rim	5	40	15	50	3	155	111.794	0.023265	48.4549		15.6883	0.008028	0.010363	0.692788	0.016691	-0.07885	0.022697	35.0844	99.9226	0.038807	65.4529	33.5629	0.015168	0.017185	0.89127	0.023354	-0.10629	0.027341	0	99.9226	0.006159	0.009639	0.009281	0.007919	0.009769	0.031151	0.03972	0	0	0.010273	0.01302	0.019856	0.014963	0.0162	0.040075	0.055576	0	0	-8781
zircon-1 rim	5	40	15	50	3	156	125.21	0.023247	47.4301		16.3765	0.162301	0.012079	0.62662	0.033935	0.003648	0.167054	35.6935	100.529	0.038778	64.0685	35.0351	0.306664	0.02003	0.806145	0.047482	0.004917	0.201232	0	100.529	0.006201	0.009693	0.00932	0.007837	0.010178	0.031437	0.036646	0	0	0.010344	0.013093	0.019939	0.014808	0.016878	0.040444	0.051275	0	0	-8775
zircon-1 to glass	6	40	15	50	3	157	0	0.014587	48.5177		15.7247	0.004647	0.005539	0.383867	-0.0116	0.012929	0.021502	35.0678	99.7416	0.024332	65.5377	33.6407	0.008781	0.009185	0.493843	-0.01623	0.017429	0.025902	0	99.7416	0.006334	0.009852	0.00903	0.007861	0.010085	0.031471	0.041481	0	0	0.010566	0.013308	0.019318	0.014853	0.016724	0.040487	0.058041	0	0	-8826
zircon-1 to glass	6	40	15	50	3	158	3.16228	0.023276	47.3954		15.562	0.023771	0.01161	0.43222	0.069388	-0.03101	0.023607	34.5469	98.0571	0.038826	64.0217	33.2926	0.044916	0.019253	0.55605	0.097088	-0.0418	0.028437	8e-06	98.0571	0.006235	0.009781	0.009592	0.007919	0.009959	0.03098	0.024447	0	0	0.0104	0.013213	0.020521	0.014963	0.016515	0.039856	0.034207	0	0	-8829
zircon-1 to glass	6	40	15	50	3	159	6.32456	0.111361	0.157528		36.7243	6.11844	0.032658	1.55558	0.363365	0.494041	1.55829	48.5169	95.6325	0.185757	0.212789	78.5664	11.5607	0.054157	2.00124	0.50842	0.665956	1.8771	0	95.6325	0.004627	0.006951	0.007257	0.006513	0.008204	0.025789	0.022045	0	0	0.007718	0.00939	0.015525	0.012306	0.013604	0.033177	0.030845	0	0	-8832
zircon-1 to glass	6	40	15	50	3	160	9.48683	0.110908	0.057504	0.050504	36.7001	6.16871	0.030597	1.57966	0.385761	0.437766	1.33228	48.4474	95.2507	0.185	0.077676	78.5147	11.6557	0.050739	2.03223	0.539757	0.590099	1.60485	8e-06	95.2507	0.004563	0.006968	0.007383	0.006714	0.008476	0.023883	0.016978	0	0	0.007612	0.009413	0.015795	0.012685	0.014056	0.030725	0.023756	0	0	-8835
zircon-1 to glass	6	40	15	50	3	161	11.7229	0.102664	0.049251	0.045851	35.7653	6.07942	0.035525	1.51747	0.364911	0.533222	1.00325	47.2375	92.6885	0.171249	0.066528	76.5148	11.487	0.058911	1.95222	0.510584	0.718772	1.2085	-1e-05	92.6885	0.004529	0.007112	0.00753	0.006472	0.007831	0.024354	0.013825	0	0	0.007554	0.009606	0.01611	0.012228	0.012986	0.031332	0.019344	0	0	-8837
zircon-1 to glass	6	40	15	50	3	162	14.8852	0.116036	0.054042	0.051942	36.6453	6.48001	0.037836	1.56919	0.353189	0.388277	1.09072	48.5862	95.3208	0.193555	0.072999	78.3974	12.2439	0.062744	2.01876	0.494183	0.523388	1.31387	8e-06	95.3208	0.004445	0.007062	0.007433	0.006668	0.008246	0.024899	0.024177	0	0	0.007414	0.00954	0.015901	0.012599	0.013674	0.032033	0.033828	0	0	-8840
zircon-1 to glass	6	40	15	50	3	163	17.8852	0.10992	0.046688	0.045688	35.9737	6.33666	0.033067	1.57455	0.270261	0.44102	1.12946	47.6784	93.5938	0.183353	0.063066	76.9607	11.973	0.054836	2.02566	0.378149	0.594484	1.36054	8e-06	93.5938	0.00462	0.006789	0.007397	0.006684	0.008088	0.025272	0.040834	0	0	0.007706	0.00917	0.015825	0.012629	0.013412	0.032512	0.057134	0	0	-8843
zircon-1 to glass	6	40	15	50	3	164	21.0475	0.104736	0.055663	0.054663	36.7354	6.03765	0.042776	1.60285	0.332862	0.524463	1.71907	48.4691	95.6246	0.174706	0.07519	78.5902	11.408	0.070935	2.06206	0.46574	0.706964	2.07078	4e-06	95.6246	0.004704	0.006821	0.007492	0.006546	0.007678	0.024653	0.024237	0	0	0.007847	0.009213	0.016027	0.012368	0.012732	0.031716	0.033913	0	0	-8846
zircon-1 to glass	6	40	15	50	3	165	24.2097	0.0196	0.004167	0.003267	46.2007	0.438615	0.000117	0.265853	-0.00672	0.712239	0.24014	53.4144	101.289	0.032694	0.005629	98.8398	0.828755	0.000194	0.342019	-0.00941	0.960081	0.289271	1.1e-05	101.289	0.004465	0.007015	0.007291	0.006509	0.008169	0.02308	0.031409	0	0	0.007448	0.009476	0.015598	0.012299	0.013546	0.029692	0.043948	0	0	-8849
zircon-1 to glass	6	40	15	50	3	166	27.372	0.016297	0.003437	0.002737	46.8515	0.019976	-0.00444	0.185	0.036681	0.721348	0.045555	53.7356	101.611	0.027185	0.004643	100.232	0.037745	-0.00737	0.238002	0.051324	0.972361	0.054876	0	101.611	0.004497	0.006988	0.006883	0.006372	0.008119	0.024027	0.006732	0	0	0.007501	0.00944	0.014725	0.012039	0.013464	0.030911	0.009419	0	0	-8852
zircon-1 to glass	6	40	15	50	3	167	30.5343	0.011635	-0.00533	-0.000533	46.7356	0.016943	0.004556	0.167677	0.008331	0.667893	0.037187	53.5639	101.208	0.019407	-0.0072	99.9841	0.032014	0.007555	0.215716	0.011657	0.900304	0.044796	4e-06	101.208	0.004467	0.00716	0.007179	0.006351	0.007662	0.024037	0.025307	0	0	0.007451	0.009671	0.015359	0.012001	0.012707	0.030923	0.03541	0	0	-8855
zircon-1 to glass	6	40	15	50	3	168	32.7704	0.014101	-0.00908	-0.00908	46.4923	0.012157	-0.00279	0.191015	0.045082	0.749594	0.021177	53.3244	100.838	0.023522	-0.01227	99.4636	0.02297	-0.00462	0.24574	0.063079	1.01044	0.02551	0	100.838	0.00458	0.007079	0.007453	0.006554	0.008026	0.022359	0.006614	0	0	0.00764	0.009562	0.015944	0.012383	0.013309	0.028765	0.009255	0	0	-8857
zircon-1 to glass	6	40	15	50	3	169	35.9326	0.016268	0.001854	0.001854	46.9415	0.014858	-0.00208	0.156097	0.01506	0.739831	0.036998	53.8223	101.743	0.027137	0.002505	100.425	0.028073	-0.00345	0.200819	0.021072	0.997275	0.044568	0	101.743	0.004423	0.006698	0.007287	0.006539	0.007942	0.025494	0.022158	0	0	0.007378	0.009048	0.015591	0.012355	0.01317	0.032797	0.031004	0	0	-8860
zircon-1 to glass	6	40	15	50	3	170	39.0949	0.013281	-0.00023	-0.00023	47.0145	0.013028	-0.0059	0.153941	-0.07262	0.69137	0.038628	53.8465	101.693	0.022154	-0.00031	100.581	0.024617	-0.00978	0.198044	-0.1016	0.931951	0.046531	4e-06	101.693	0.00451	0.007059	0.007159	0.006537	0.00833	0.023575	0.041065	0	0	0.007523	0.009536	0.015316	0.012351	0.013814	0.030329	0.057458	0	0	-8863
zircon-1 to glass	6	40	15	50	3	171	42.2572	0.012304	-0.00073	-0.00073	46.8485	0.015985	0.006365	0.161395	-0.00083	0.709474	0.059986	53.7086	101.521	0.020523	-0.00099	100.226	0.030203	0.010555	0.207634	-0.00116	0.956355	0.072258	8e-06	101.521	0.004465	0.006977	0.007131	0.006364	0.007513	0.024222	0.02721	0	0	0.007448	0.009424	0.015255	0.012025	0.012459	0.031162	0.038073	0	0	-8866
zircon-1 to glass	6	40	15	50	3	172	45.4195	0.009312	-0.00512	-0.00512	46.6989	0.020307	-0.00144	0.159489	-0.00673	0.661984	0.029973	53.5078	101.074	0.015534	-0.00692	99.9056	0.03837	-0.00238	0.205182	-0.00942	0.89234	0.036105	-1e-05	101.074	0.004559	0.007156	0.007164	0.006458	0.008011	0.022822	0.028996	0	0	0.007605	0.009666	0.015326	0.012202	0.013284	0.029361	0.040571	0	0	-8869
zircon-1 to glass	6	40	15	50	3	173	48.4195	0.014747	0.006143	0.006143	46.6796	0.099185	0.003158	0.171049	0.035864	0.688771	0.024126	53.595	101.318	0.024599	0.008298	99.8643	0.187409	0.005237	0.220054	0.050181	0.928448	0.029062	4e-06	101.318	0.004342	0.006964	0.007332	0.006307	0.008129	0.022903	0.018476	0	0	0.007243	0.009407	0.015686	0.011918	0.01348	0.029465	0.025852	0	0	-8872
zircon-1 to glass	6	40	15	50	3	174	51.5817	0.010189	0.002648	0.002648	46.8025	0.015607	-0.00285	0.127397	0.018489	0.673833	0.03942	53.631	101.318	0.016995	0.003577	100.127	0.029489	-0.00473	0.163896	0.02587	0.908312	0.047485	0	101.318	0.004611	0.006836	0.007016	0.006348	0.008208	0.024921	0.018486	0	0	0.007691	0.009234	0.015009	0.011995	0.013611	0.032061	0.025865	0	0	-8875
zircon-1 to glass	6	40	15	50	3	175	53.8178	0.01382	-0.00066	-0.00066	46.8458	0.011055	-0.00072	0.138071	0.020916	0.71169	0.028102	53.6938	101.462	0.023052	-0.00089	100.22	0.020888	-0.0012	0.177628	0.029265	0.959343	0.033851	0	101.462	0.004589	0.006694	0.007062	0.006446	0.008054	0.024619	0.019791	0	0	0.007654	0.009042	0.015107	0.01218	0.013356	0.031673	0.027691	0	0	-8877
zircon-1 to glass	6	40	15	50	3	176	56.9801	0.013237	0.003362	0.003362	46.4928	0.01089	-0.00521	0.125883	0.018268	0.75726	0.028565	53.3009	100.746	0.02208	0.004541	99.4647	0.020576	-0.00865	0.161948	0.02556	1.02077	0.034409	0	100.746	0.004547	0.006604	0.007203	0.006522	0.008071	0.024441	0.024319	0	0	0.007585	0.008921	0.01541	0.012323	0.013385	0.031444	0.034027	0	0	-8880
zircon-2 core	7	40	15	50	3	177	0	0.034535	46.1167		16.8216	0.254313	-0.00111	0.837964	0.053019	-0.08725	0.161701	35.8561	100.048	0.057606	62.2945	35.9874	0.48052	-0.00184	1.07804	0.074185	-0.11762	0.194784	0	100.048	0.006198	0.009628	0.009444	0.007923	0.010468	0.030411	0.032688	0	0	0.010338	0.013006	0.020204	0.014971	0.017359	0.039124	0.045736	0	0	-8787
zircon-2 core	7	40	15	50	3	178	2	0.032183	47.7351		15.6944	0.013818	0.007953	0.735191	0.063152	-0.16777	0.062231	34.8562	99.0324	0.053683	64.4806	33.5758	0.026109	0.013189	0.945822	0.088362	-0.22615	0.074963	4e-06	99.0324	0.006206	0.009891	0.009323	0.008077	0.010292	0.032363	0.026209	0	0	0.010352	0.013361	0.019946	0.01526	0.017067	0.041635	0.036672	0	0	-8787
zircon-2 rim	8	40	15	50	3	179	0	0.033362	47.8937		15.6258	0.01438	0.007118	0.649298	0.026585	-0.07306	0.038958	34.8235	99.0397	0.05565	64.6949	33.4292	0.027171	0.011804	0.83532	0.037197	-0.09849	0.046928	8e-06	99.0397	0.006199	0.009713	0.009457	0.007653	0.010185	0.032359	0.031911	0	0	0.010341	0.01312	0.020232	0.014461	0.01689	0.04163	0.044649	0	0	-8791
zircon-2 rim	8	40	15	50	3	180	4	0.024156	48.0366		15.5286	-9e-05	0.00854	0.695012	-0.00663	-0.15111	0.03296	34.7162	98.8842	0.040294	64.8878	33.2212	-0.00017	0.014162	0.894131	-0.00927	-0.20369	0.039704	0	98.8842	0.006373	0.009673	0.009465	0.008053	0.009951	0.032122	0.040892	0	0	0.010631	0.013066	0.020249	0.015217	0.016502	0.041325	0.057216	0	0	-8787
zircon-2 rim	8	40	15	50	3	181	11.2111	0.069596	19.8884		28.1236	3.39301	0.025359	1.3511	0.213578	0.271217	1.07022	42.8866	97.2927	0.116091	26.8653	60.1664	6.41104	0.042053	1.73819	0.298838	0.365595	1.28918	8e-06	97.2927	0.005366	0.008455	0.008148	0.006779	0.009124	0.02816	0.030109	0	0	0.008951	0.011421	0.017432	0.012808	0.01513	0.036228	0.042129	0	0	-8781
zircon-2 rim	8	40	15	50	3	182	19.7551	0.113328	0.077271		37.2447	6.32202	0.042299	1.80295	0.334239	0.524906	1.48517	49.3255	97.2725	0.189038	0.104378	79.6798	11.9454	0.070144	2.31949	0.467668	0.707562	1.78902	0	97.2725	0.00471	0.006658	0.007307	0.006672	0.007798	0.023473	0.02796	0	0	0.007856	0.008994	0.015633	0.012607	0.012932	0.030199	0.039121	0	0	-8784
zircon-2 rim	8	40	15	50	3	183	28.9747	0.110854	0.191655		37.0476	6.21114	0.031349	1.73569	0.332463	0.50296	1.23099	48.9539	96.3485	0.184911	0.258887	79.258	11.7358	0.051986	2.23295	0.465183	0.677979	1.48284	1.1e-05	96.3485	0.004623	0.006833	0.007326	0.006481	0.00843	0.02393	0.030487	0	0	0.007711	0.009231	0.015674	0.012246	0.01398	0.030786	0.042658	0	0	-8790
zircon-2 rim	8	40	15	50	3	184	34.0737	0.039375	46.6605		16.5555	0.20236	0.010058	0.84063	0.0897	-0.01063	0.095244	35.7365	100.219	0.06568	63.0291	35.4181	0.382356	0.016679	1.08147	0.125508	-0.01433	0.114731	0	100.219	0.006236	0.009807	0.009438	0.008188	0.009887	0.032069	0.021351	0	0	0.010401	0.013247	0.020191	0.015471	0.016396	0.041257	0.029874	0	0	-8791
zircon-2 to glass	9	40	15	50	3	185	0	0.033416	48.2819		15.7709	0.005319	0.006792	0.780869	0.08164	-0.14294	0.031569	35.1505	100	0.05574	65.2192	33.7396	0.01005	0.011263	1.00459	0.114231	-0.19268	0.038027	0	100	0.006306	0.009642	0.009145	0.007878	0.010148	0.031902	0.020194	0	0	0.010518	0.013024	0.019565	0.014886	0.016828	0.041042	0.028256	0	0	-8790
zircon-2 to glass	9	40	15	50	3	186	3	0.037865	48.1472		15.7016	0.003949	0.003836	0.849513	-0.00588	-0.12397	0.030385	35.0152	99.6597	0.063161	65.0372	33.5914	0.007461	0.006362	1.0929	-0.00822	-0.1671	0.036601	0	99.6597	0.00622	0.009654	0.009208	0.007982	0.010241	0.033233	0.039149	0	0	0.010376	0.013041	0.0197	0.015082	0.016983	0.042754	0.054777	0	0	-8793
zircon-2 to glass	9	40	15	50	3	187	6	0.049519	48.062		15.7232	0.012962	0.008853	0.887615	0.055598	-0.14552	0.022137	35.0553	99.7317	0.0826	64.9222	33.6375	0.024492	0.01468	1.14191	0.077793	-0.19616	0.026667	0	99.7317	0.006181	0.009783	0.009467	0.008041	0.010149	0.032744	0.027991	0	0	0.010311	0.013214	0.020253	0.015193	0.01683	0.042125	0.039166	0	0	-8796
zircon-2 to glass	9	40	15	50	3	188	9	0.086648	28.6589		22.1185	2.69519	0.013949	1.19541	0.242143	0.181736	0.951793	38.416	94.5603	0.144534	38.7125	47.3194	5.09252	0.023132	1.5379	0.338807	0.244976	1.14652	4e-06	94.5603	0.00531	0.0085	0.008634	0.007322	0.009075	0.028562	0	0	0	0.008857	0.011482	0.018471	0.013835	0.01505	0.036745	0	0	0	-8799
zircon-2 to glass	9	40	15	50	3	189	12	0.12602	0.401505		36.5215	6.41587	0.040143	1.84574	0.381093	-0.85007	1.03595	48.1664	94.0841	0.210208	0.542353	78.1326	12.1227	0.066569	2.37454	0.533226	-1.1459	1.2479	-1e-05	94.0841	0.004519	0.007053	0.007415	0.006452	0.007647	0.022583	0.025164	0	0	0.007538	0.009527	0.015863	0.012191	0.01268	0.029052	0.035209	0	0	-8802
zircon-2 to glass	9	40	15	50	3	190	15	0.123849	0.048452	0.040452	35.6555	6.41735	0.035691	1.77332	0.330311	0.42163	0.980504	47.4429	93.2295	0.206587	0.065449	76.2798	12.1255	0.059186	2.28137	0.462172	0.568348	1.18111	0	93.2295	0.004576	0.007036	0.007157	0.006761	0.008036	0.023919	0.029574	0	0	0.007633	0.009504	0.015312	0.012776	0.013326	0.030772	0.041381	0	0	-8805
zircon-2 to glass	9	40	15	50	3	191	18	0.12005	0.058985	0.054785	36.6547	6.43606	0.035157	1.78908	0.356166	0.416928	1.11967	48.6406	95.6274	0.20025	0.079677	78.4176	12.1608	0.0583	2.30165	0.498347	0.56201	1.34875	0	95.6274	0.004522	0.00682	0.00739	0.006579	0.008006	0.024001	0.028753	0	0	0.007544	0.009212	0.015811	0.012431	0.013277	0.030878	0.040231	0	0	-8808
zircon-2 to glass	9	40	15	50	3	192	21	0.118297	0.054238	0.051838	37.205	6.34932	0.036036	1.7972	0.330232	0.460032	1.33094	49.2382	96.9195	0.197326	0.073264	79.5947	11.9969	0.059759	2.31209	0.462061	0.620113	1.60324	-1e-05	96.9195	0.004621	0.007028	0.007492	0.006511	0.007766	0.024225	0.030368	0	0	0.007709	0.009493	0.016027	0.012302	0.012878	0.031166	0.042491	0	0	-8811
zircon-2 to glass	9	40	15	50	3	193	24	0.119378	0.047341	0.045941	37.2204	6.45012	0.036237	1.79097	0.379091	0.465744	1.41249	49.3803	97.3021	0.19913	0.063948	79.6278	12.1874	0.060092	2.30408	0.530425	0.627812	1.70147	-1e-05	97.3021	0.004562	0.006919	0.0075	0.006716	0.007916	0.024217	0.011853	0	0	0.007609	0.009346	0.016045	0.012691	0.013127	0.031155	0.016585	0	0	-8814
zircon-2 to glass	9	40	15	50	3	194	27	0.114536	0.055901	0.055101	38.1848	6.34774	0.035881	1.79669	0.302776	0.420072	1.05224	50.2691	98.5797	0.191053	0.075512	81.6909	11.9939	0.059502	2.31143	0.423645	0.566248	1.26752	0	98.5797	0.00467	0.006714	0.007485	0.00644	0.008084	0.024164	0.037524	0	0	0.007789	0.009069	0.016014	0.012169	0.013405	0.031088	0.052504	0	0	-8817
zircon-2 to glass	9	40	15	50	3	195	30	0.118929	0.057085	0.057085	37.7443	6.47486	0.034478	1.82252	0.353128	0.460793	1.00298	49.9144	97.9834	0.19838	0.077111	80.7486	12.2341	0.057175	2.34467	0.494098	0.621139	1.20819	-1e-05	97.9834	0.004667	0.006809	0.007447	0.006456	0.008125	0.0244	0.027844	0	0	0.007786	0.009198	0.015931	0.012198	0.013473	0.03139	0.03896	0	0	-8820
zircon-2 to glass	9	40	15	50	3	196	33	0.119753	0.0468	0.0468	37.9585	6.44432	0.034464	1.80263	0.298911	0.478372	0.979635	50.1022	98.2655	0.199755	0.063218	81.2067	12.1764	0.057152	2.31908	0.418237	0.644835	1.18006	4e-06	98.2655	0.004653	0.006879	0.00729	0.006584	0.008219	0.024057	0.037505	0	0	0.007762	0.009292	0.015597	0.012439	0.013629	0.03095	0.052477	0	0	-8823
zircon-2 to glass	9	40	15	50	3	197	36	0.122196	0.053367	0.053367	37.4092	6.34153	0.031429	1.80036	0.363158	0.463285	1.29753	49.4716	97.3536	0.203831	0.072088	80.0316	11.9822	0.052118	2.31616	0.508132	0.624498	1.563	0	97.3536	0.004634	0.006901	0.007576	0.006694	0.00812	0.023259	0.02506	0	0	0.00773	0.009322	0.016207	0.012649	0.013465	0.029923	0.035064	0	0	-8826
zircon-2 to glass	9	40	15	50	3	198	39	0.123062	0.051323	0.051323	37.3788	6.36079	0.029308	1.78615	0.375499	0.452637	1.25725	49.4415	97.2564	0.205275	0.069327	79.9667	12.0186	0.048602	2.29787	0.525399	0.610144	1.51448	0	97.2564	0.00466	0.006723	0.007351	0.006619	0.008223	0.023849	0.026029	0	0	0.007773	0.009081	0.015727	0.012506	0.013636	0.030681	0.03642	0	0	-8829
zircon-2 to glass	9	40	15	50	3	199	42	0.112674	0.043098	0.043098	37.306	6.33513	0.037864	1.74664	0.377926	0.485068	1.33737	49.3488	97.1305	0.187947	0.058217	79.8108	11.9701	0.062789	2.24704	0.528795	0.65386	1.61098	-1e-05	97.1305	0.004749	0.006833	0.007637	0.006407	0.008041	0.024637	0.0287	0	0	0.007922	0.00923	0.016339	0.012106	0.013334	0.031696	0.040157	0	0	-8832
zircon-2 to glass	9	40	15	50	3	200	45	0.119955	0.044686	0.044686	37.1884	6.44676	0.031558	1.79245	0.317567	0.507383	1.35818	49.3165	97.1234	0.200092	0.060362	79.5592	12.181	0.052333	2.30599	0.44434	0.68394	1.63605	0	97.1234	0.004688	0.006827	0.007307	0.006637	0.008123	0.023674	0.036913	0	0	0.007819	0.009222	0.015632	0.012541	0.013471	0.030456	0.051648	0	0	-8835
zircon-2 to glass	9	40	15	50	3	201	48	0.119949	0.046726	0.046726	38.0934	6.36808	0.036217	1.73584	0.307859	0.494752	1.19743	50.2241	98.6243	0.200083	0.063118	81.4955	12.0324	0.060059	2.23315	0.430756	0.666915	1.44241	8e-06	98.6243	0.004667	0.006914	0.007361	0.006362	0.008165	0.024116	0.036238	0	0	0.007785	0.009339	0.015748	0.012021	0.013539	0.031025	0.050704	0	0	-8838
zircon-2 to glass	9	40	15	50	3	202	51	0.123743	0.046586	0.046586	38.1737	6.43951	0.037427	1.72515	0.256037	0.457963	0.956973	50.2966	98.5137	0.20641	0.062929	81.6672	12.1673	0.062065	2.2194	0.358247	0.617324	1.15276	0	98.5137	0.004598	0.006892	0.00724	0.006567	0.008097	0.024322	0.035572	0	0	0.00767	0.00931	0.015488	0.012407	0.013427	0.03129	0.049773	0	0	-8841
zircon-2 to glass	9	40	15	50	3	203	54	0.112648	0.043392	0.043392	37.6992	6.38194	0.036714	1.71054	0.312089	0.485067	1.23094	49.7795	97.792	0.187903	0.058614	80.6521	12.0586	0.060882	2.2006	0.436675	0.65386	1.48278	0	97.792	0.004658	0.006921	0.007145	0.00651	0.007748	0.024361	0.032687	0	0	0.00777	0.009349	0.015286	0.012301	0.012849	0.031341	0.045736	0	0	-8844
zircon-3 core	10	40	15	50	3	204	0	0.010528	44.4188		14.9909	0.039948	0.006503	0.204747	0.241192	-0.23099	0	32.7836	92.4653	0.017561	60.001	32.071	0.075481	0.010784	0.263407	0.337476	-0.31137	0	4e-06	92.4653	0.006363	0.009711	0.009648	0.008513	0.010123	0.031355	0.042444	0	0	0.010613	0.013117	0.02064	0.016085	0.016786	0.040338	0.059388	0	0	-8172
zircon-3 core	10	40	15	50	3	205	12	0.014493	46.808		15.5337	0.001579	0.010239	0.10787	-0.03912	-0.16826	0	34.0932	96.3617	0.024174	63.2283	33.2321	0.002984	0.016979	0.138775	-0.05473	-0.22682	0	4e-06	96.3617	0.006263	0.009579	0.009496	0.008202	0.009889	0.031253	0.045639	0	0	0.010448	0.01294	0.020316	0.015497	0.016399	0.040207	0.063858	0	0	-8184
zircon-3 core	10	40	15	50	3	206	17	0.015873	45.8547		15.0217	0.004442	0.005677	0.662286	-0.0092	-0.13034	0	33.3599	94.7849	0.026477	61.9405	32.1367	0.008394	0.009414	0.852028	-0.01288	-0.17569	0	-1e-05	94.7849	0.0063	0.009588	0.009254	0.008278	0.010122	0.032452	0.041314	0	0	0.010509	0.012951	0.019797	0.015642	0.016786	0.041749	0.057806	0	0	-8179
zircon-3 rim	11	40	15	50	3	207	0	0.016477	47.3833		15.5351	0.001891	0.000924	0.086559	-0.04457	-0.16358	0	34.2855	97.1016	0.027485	64.0054	33.2352	0.003574	0.001532	0.111357	-0.06236	-0.2205	0	0	97.1016	0.006234	0.009703	0.00933	0.008128	0.0102	0.032219	0.044602	0	0	0.010398	0.013107	0.01996	0.015358	0.016915	0.041449	0.062407	0	0	-8180
zircon-3 rim	11	40	15	50	3	208	23.7697	0.019768	47.4277		15.5565	0.001211	0.007534	0.052588	0.004696	-0.14409	0	34.348	97.2739	0.032974	64.0653	33.2808	0.002288	0.012493	0.067655	0.00657	-0.19423	0	4e-06	97.2739	0.006285	0.009737	0.009364	0.007794	0.009693	0.032251	0.036572	0	0	0.010483	0.013152	0.020032	0.014726	0.016074	0.041491	0.051171	0	0	-8202
zircon-3 rim	11	40	15	50	3	209	31.832	0.021175	46.3013		15.4427	-0.00701	0.005952	0.068899	-0.01332	-0.15739	0	33.8088	95.4711	0.035322	62.5438	33.0375	-0.01324	0.00987	0.088638	-0.01863	-0.21215	0	0	95.4711	0.006188	0.009732	0.009514	0.008365	0.010051	0.033096	0.041927	0	0	0.010321	0.013146	0.020354	0.015806	0.016668	0.042578	0.058664	0	0	-8206
zircon-3 rim	11	40	15	50	3	210	59.4182	0.01918	46.3324		15.5016	0.015186	0.014141	0.083786	-0.0008	-0.15374	0	33.9211	95.7328	0.031994	62.5859	33.1634	0.028694	0.02345	0.107791	-0.00112	-0.20723	0	4e-06	95.7328	0.006311	0.009682	0.009651	0.008162	0.009952	0.031298	0.039575	0	0	0.010528	0.013078	0.020647	0.015423	0.016504	0.040265	0.055374	0	0	-8187
zircon-3 rim	11	40	15	50	3	211	108.173	0.033929	46.3491		15.8307	0.062862	0.009249	0.12102	0.069228	-0.00467	0.05771	34.4533	96.9825	0.056596	62.6084	33.8676	0.118776	0.015337	0.155692	0.096864	-0.00629	0.069518	0	96.9825	0.00631	0.009836	0.009429	0.008149	0.009942	0.030649	0.030265	0	0	0.010526	0.013287	0.020173	0.015397	0.016486	0.03943	0.042346	0	0	-8143
zircon-3 to glass	12	40	15	50	3	212	0	0.100294	12.5678		32.1148	4.69493	0.030927	1.15963	0.283225	0.424869	1.50404	46.1632	99.0437	0.167296	16.9766	68.7049	8.87099	0.051286	1.49186	0.396289	0.572714	1.81176	0	99.0437	0.005082	0.00811	0.008051	0.006584	0.008916	0.025635	0.021813	0	0	0.008476	0.010955	0.017225	0.012441	0.014785	0.032979	0.030521	0	0	-8152
zircon-3 to glass	12	40	15	50	3	213	3.16228	0.137282	0.07029	0.03829	37.421	6.33113	0.037572	1.4276	0.355432	0.470131	1.40408	49.4101	97.0646	0.228994	0.094947	80.0568	11.9626	0.062306	1.83661	0.497321	0.633726	1.69135	-1e-05	97.0646	0.004581	0.006943	0.007498	0.006472	0.008029	0.023412	0.024088	0	0	0.007642	0.009379	0.016041	0.012229	0.013315	0.030119	0.033703	0	0	-8149
zircon-3 to glass	12	40	15	50	3	214	5.99071	0.129642	0.057689	0.048689	37.4903	6.36834	0.036467	1.45747	0.354074	0.421802	1.1617	49.4536	96.9311	0.216251	0.077926	80.2052	12.0329	0.060474	1.87503	0.49542	0.568579	1.39937	0	96.9311	0.004608	0.006951	0.007602	0.006541	0.008077	0.024245	0.033433	0	0	0.007686	0.00939	0.016264	0.012359	0.013394	0.031191	0.04678	0	0	-8147
zircon-3 to glass	12	40	15	50	3	215	9.15298	0.130081	0.051312	0.047312	37.5263	6.3659	0.034484	1.43402	0.342361	0.475734	1.27904	49.5206	97.1598	0.216983	0.069312	80.2822	12.0283	0.057184	1.84486	0.479032	0.641279	1.54073	4e-06	97.1598	0.004746	0.007138	0.007253	0.006526	0.008151	0.024063	0.025141	0	0	0.007916	0.009642	0.015516	0.012331	0.013517	0.030956	0.035177	0	0	-8144
zircon-3 to glass	12	40	15	50	3	216	12.7585	0.13443	0.051394	0.048994	37.6676	6.41106	0.036921	1.39277	0.36309	0.448494	1.15767	49.6884	97.3518	0.224237	0.069423	80.5845	12.1136	0.061225	1.79179	0.508036	0.604559	1.39452	0	97.3518	0.004568	0.007032	0.0076	0.006413	0.008043	0.024869	0.025202	0	0	0.007619	0.009499	0.01626	0.012116	0.013338	0.031993	0.035262	0	0	-8141
zircon-3 to glass	12	40	15	50	3	217	14.9946	0.130669	0.050495	0.048995	38.1868	6.43833	0.030305	1.46258	0.337645	0.405797	0.789146	50.2166	98.0483	0.217963	0.068209	81.6952	12.1651	0.050255	1.8816	0.472433	0.547006	0.9506	-1e-05	98.0483	0.004524	0.006968	0.007613	0.006349	0.008565	0.025179	0.034443	0	0	0.007546	0.009412	0.016288	0.011997	0.014203	0.032393	0.048193	0	0	-8139
zircon-3 to glass	12	40	15	50	3	218	18.6002	0.127176	0.046316	0.045216	37.7512	6.39179	0.038185	1.43672	0.343387	0.427384	1.29368	49.786	97.6418	0.212137	0.062563	80.7633	12.0772	0.063323	1.84834	0.480467	0.576104	1.55836	0	97.6418	0.004538	0.006971	0.007321	0.006544	0.008149	0.023255	0.030117	0	0	0.007569	0.009416	0.015663	0.012365	0.013514	0.029917	0.04214	0	0	-8136
zircon-3 to glass	12	40	15	50	3	219	20.8362	0.125689	0.038385	0.037485	38.3473	6.4349	0.032171	1.46475	0.293617	0.404862	0.752814	50.3654	98.2598	0.209656	0.05185	82.0385	12.1586	0.053348	1.88439	0.41083	0.545745	0.906834	-1e-05	98.2598	0.004668	0.007401	0.007592	0.006694	0.008401	0.022782	0.039276	0	0	0.007786	0.009997	0.016241	0.012648	0.013932	0.02931	0.054954	0	0	-8134
zircon-3 to glass	12	40	15	50	3	220	23.9985	0.129109	0.048626	0.048626	36.9358	6.36662	0.033764	1.36284	0.271891	0.475078	1.28517	48.7988	95.7077	0.215361	0.065684	79.0188	12.0296	0.055991	1.75329	0.38043	0.640395	1.5481	4e-06	95.7077	0.004556	0.006785	0.00735	0.006251	0.007928	0.026346	0.037294	0	0	0.007599	0.009165	0.015725	0.011811	0.013147	0.033894	0.052182	0	0	-8131
zircon-3 to glass	12	40	15	50	3	221	27.6041	0.131056	0.038609	0.038609	36.813	6.20368	0.032179	1.44638	0.365713	0.473851	1.45945	48.6074	95.5713	0.218608	0.052153	78.7562	11.7217	0.053363	1.86076	0.511706	0.63874	1.75804	8e-06	95.5713	0.004641	0.006878	0.006993	0.006426	0.008072	0.024226	0.019503	0	0	0.007742	0.009291	0.01496	0.012143	0.013386	0.031167	0.027289	0	0	-8128
zircon-3 to glass	12	40	15	50	3	222	29.8401	0.125207	0.046406	0.046406	37.2802	6.42596	0.030332	1.37962	0.371147	0.393878	1.14336	49.2255	96.4216	0.208853	0.062685	79.7557	12.1417	0.0503	1.77488	0.519309	0.530938	1.37728	0	96.4216	0.004533	0.006909	0.007459	0.006619	0.008249	0.024277	0.019395	0	0	0.007562	0.009332	0.015957	0.012507	0.013679	0.031233	0.027138	0	0	-8126
zircon-3 to glass	12	40	15	50	3	223	33.4457	0.130895	0.042164	0.042164	35.6139	6.45589	0.029542	1.34684	0.358166	0.55661	1.69593	47.5106	93.7406	0.21834	0.056955	76.191	12.1983	0.04899	1.7327	0.501147	0.750298	2.0429	0	93.7406	0.004497	0.006896	0.007383	0.006463	0.008242	0.023928	0.032504	0	0	0.007502	0.009315	0.015794	0.012211	0.013667	0.030783	0.045479	0	0	-8123
zircon-3 to glass	12	40	15	50	3	224	36.608	0.025569	0.00233	0.00233	32.6471	10.9858	0.007246	0.389444	1.10684	0.662522	0.522835	47.882	94.2318	0.042651	0.003147	69.8439	20.7575	0.012015	0.501018	1.54869	0.893065	0.629803	0	94.2318	0.004626	0.007043	0.007378	0.006441	0.00816	0.024428	0.037258	0	0	0.007717	0.009513	0.015784	0.012171	0.013532	0.031427	0.052131	0	0	-8120
zircon-3 to glass	12	40	15	50	3	225	39.4364	0.017735	-0.0042	-0.0042	32.9262	11.0588	0.002255	0.416615	1.08396	0.536646	0.392855	48.1823	94.6131	0.029583	-0.00568	70.4409	20.8953	0.00374	0.535973	1.51667	0.723387	0.47323	0	94.6131	0.00463	0.007065	0.00744	0.006328	0.00779	0.023058	0.030018	0	0	0.007723	0.009543	0.015918	0.011957	0.012919	0.029664	0.042001	0	0	-8118
zircon-3 to glass	12	40	15	50	3	226	42.5987	0.01802	-0.00071	-0.00071	32.9903	11.2921	-0.00143	0.367227	1.10658	0.652267	0.408171	48.5002	95.3328	0.030058	-0.00096	70.5781	21.3362	-0.00238	0.472436	1.54832	0.879241	0.49168	0	95.3328	0.004598	0.007076	0.0075	0.006496	0.007981	0.025569	0.037015	0	0	0.00767	0.009558	0.016044	0.012274	0.013235	0.032895	0.051792	0	0	-8115
zircon-3 to glass	12	40	15	50	3	227	46.2042	0.015429	0.005049	0.005049	32.2308	10.9608	-0.00467	0.361358	0.974149	0.911086	0	47.2903	92.7442	0.025736	0.006821	68.9531	20.7102	-0.00774	0.464886	1.36303	1.22812	0	1.1e-05	92.7442	0.004556	0.00662	0.007715	0.006635	0.008121	0.023865	0.035771	0	0	0.0076	0.008942	0.016506	0.012536	0.013468	0.030703	0.050051	0	0	-8112
zircon-3 to glass	12	40	15	50	3	228	48.4403	0.018897	-0.00259	-0.00259	32.6087	10.9375	-0.00554	0.319229	0.820435	0.8457	0.905097	47.7882	94.2356	0.031522	-0.00349	69.7617	20.6662	-0.00919	0.410687	1.14795	1.13999	1.09027	0	94.2356	0.004501	0.007026	0.007791	0.006449	0.008094	0.023724	0.022786	0	0	0.007508	0.009491	0.016667	0.012185	0.013422	0.030521	0.031883	0	0	-8110
zircon-3 to glass	12	40	15	50	3	229	51.6026	0.052512	0.014005	0.014005	34.5815	9.1712	0.010891	0.744583	0.857428	0.795976	0.847497	48.6114	95.687	0.087593	0.018918	73.9821	17.3288	0.01806	0.957904	1.19971	1.07296	1.02089	4e-06	95.687	0.004741	0.006999	0.007427	0.006516	0.008117	0.02304	0.006292	0	0	0.007909	0.009454	0.015889	0.012311	0.01346	0.029641	0.008804	0	0	-8107
zircon-3 to glass	12	40	15	50	3	230	54.431	0.129215	0.041712	0.041712	37.1208	6.28764	0.037688	1.39665	0.34424	0.464265	1.35069	48.9878	96.1607	0.215538	0.056345	79.4146	11.8804	0.062497	1.79678	0.481662	0.625818	1.62703	0	96.1607	0.004713	0.006882	0.007424	0.006337	0.007936	0.023728	0.033726	0	0	0.007861	0.009297	0.015882	0.011974	0.013159	0.030525	0.047189	0	0	-8105
zircon-3 to glass	12	40	15	50	3	231	57.5933	0.126449	0.040732	0.040732	37.0352	6.326	0.031939	1.40265	0.36752	0.462728	1.39971	48.9389	96.1318	0.210924	0.05502	79.2315	11.9529	0.052964	1.8045	0.514235	0.623747	1.68608	1.5e-05	96.1318	0.004625	0.006803	0.007319	0.006482	0.008084	0.023956	0.011776	0	0	0.007715	0.00919	0.015658	0.012248	0.013405	0.030819	0.016476	0	0	-8102
zircon-3 to glass	12	40	15	50	3	232	61.1988	0.057438	0.018191	0.018191	34.4385	9.40919	0.020638	0.771553	0.86716	0.663903	1.4001	48.7501	96.3967	0.095811	0.024573	73.6762	17.7785	0.034224	0.9926	1.21333	0.894927	1.68656	8e-06	96.3967	0.004733	0.006953	0.00767	0.006482	0.008004	0.022722	0.022727	0	0	0.007896	0.009392	0.016409	0.012247	0.013273	0.029231	0.031799	0	0	-8099
zircon-3 to glass	12	40	15	50	3	233	63.4349	0.018391	-0.00322	-0.00322	33.5244	11.4392	0.001483	0.417477	1.20417	0.536104	0.111094	49.193	96.4422	0.030677	-0.00435	71.7208	21.6142	0.00246	0.537083	1.68487	0.722656	0.133823	4e-06	96.4422	0.004534	0.007025	0.007341	0.006623	0.007921	0.022496	0.043492	0	0	0.007563	0.00949	0.015705	0.012513	0.013135	0.02894	0.060855	0	0	-8097
zircon-3 to glass	12	40	15	50	3	234	67.0404	0.0154	-0.00028	-0.00028	32.7116	11.084	-0.00039	0.367085	1.02914	0.833516	0.619972	48.0721	94.7321	0.025687	-0.00038	69.9817	20.9431	-0.00064	0.472254	1.43998	1.12356	0.746814	4e-06	94.7321	0.004626	0.006976	0.007769	0.006387	0.008025	0.024506	0.029144	0	0	0.007716	0.009423	0.016621	0.012068	0.013307	0.031527	0.040778	0	0	-8094
zircon-3 to glass	12	40	15	50	3	235	70.2027	0.013168	-0.00143	-0.00143	32.2373	10.9983	0.00521	0.357721	1.10925	1.01378	0	47.4223	93.1556	0.021965	-0.00193	68.967	20.7811	0.00864	0.460207	1.55207	1.36656	0	8e-06	93.1556	0.004651	0.007008	0.007673	0.0066	0.007919	0.02347	0.032259	0	0	0.007758	0.009466	0.016414	0.01247	0.013132	0.030194	0.045137	0	0	-8091
zircon-3 to glass	12	40	15	50	3	236	72.4388	0.014131	-0.00197	-0.00197	32.5668	10.9777	0.000267	0.395196	1.09912	0.855533	0	47.7284	93.6352	0.023572	-0.00266	69.6721	20.7422	0.000443	0.508418	1.53789	1.15324	0	0	93.6352	0.004636	0.006944	0.007794	0.006417	0.008048	0.023198	0.019336	0	0	0.007733	0.00938	0.016674	0.012125	0.013346	0.029844	0.027055	0	0	-8089
zircon-3 to glass	12	40	15	50	3	237	76.0443	0.017848	0.002323	0.002323	31.9144	10.9533	0.002123	0.34934	1.22266	1.03626	0.159597	47.1002	92.758	0.029771	0.003138	68.2762	20.696	0.00352	0.449425	1.71075	1.39685	0.192249	8e-06	92.758	0.004553	0.006883	0.007626	0.006649	0.007879	0.026366	0.023787	0	0	0.007596	0.009298	0.016314	0.012563	0.013066	0.033919	0.033283	0	0	-8086
zircon-3 to glass	12	40	15	50	3	238	79.2066	0.013218	-0.00065	-0.00065	32.3036	11.0258	-0.00211	0.374505	1.20799	0.95732	0.815484	47.7093	94.4045	0.022049	-0.00088	69.109	20.8331	-0.00351	0.4818	1.69022	1.29045	0.982326	0	94.4045	0.004676	0.006867	0.007652	0.006652	0.00817	0.02257	0.024707	0	0	0.007799	0.009276	0.01637	0.012568	0.013548	0.029036	0.03457	0	0	-8083
zircon-3 to glass	12	40	15	50	3	239	82.035	0.014238	-0.00051	-0.00051	32.329	11.0889	0.001392	0.351059	1.20224	0.865328	0	47.5895	93.4412	0.02375	-0.00068	69.1632	20.9523	0.002308	0.451637	1.68218	1.16644	0	-1e-05	93.4412	0.00462	0.007114	0.007587	0.006558	0.007942	0.02417	0.026526	0	0	0.007706	0.009609	0.016232	0.01239	0.013171	0.031095	0.037116	0	0	-8081
zircon-3 to glass	12	40	15	50	3	240	85.1973	0.083843	0.023668	0.023668	35.64	8.55551	0.021668	1.00873	0.655944	0.557897	1.50403	49.348	97.3993	0.139855	0.031971	76.2467	16.1655	0.035933	1.29773	0.917797	0.752033	1.81174	1.1e-05	97.3993	0.004601	0.00721	0.007556	0.006454	0.00831	0.023905	0.030746	0	0	0.007675	0.009739	0.016165	0.012195	0.01378	0.030753	0.04302	0	0	-8078
zircon-3 to glass	12	40	15	50	3	241	88.0257	0.127942	0.042286	0.042286	37.415	6.52483	0.036204	1.38505	0.451884	0.505059	1.18693	49.5527	97.2279	0.213415	0.057119	80.0441	12.3285	0.060037	1.78187	0.632277	0.680808	1.42976	4e-06	97.2279	0.004624	0.007142	0.007508	0.006524	0.008177	0.024908	0	0	0	0.007713	0.009648	0.016061	0.012328	0.013561	0.032044	0	0	0	-8076
zircon-4 to glass	13	40	15	50	3	242	0	0.11281	4.7376		34.9051	5.66271	0.027724	1.31546	0.273834	0.589735	2.19252	47.7018	97.5192	0.188174	6.39954	74.6744	10.6996	0.045974	1.69234	0.383149	0.794949	2.6411	8e-06	97.5192	0.004909	0.007362	0.007858	0.006753	0.008916	0.026585	0.024783	0	0	0.008188	0.009945	0.016811	0.01276	0.014785	0.034202	0.034677	0	0	-8336
zircon-4 to glass	13	40	15	50	3	243	3.16228	0.133986	0.194265	0.162265	36.9345	6.16886	0.036989	1.42736	0.39153	0.508447	0.222429	48.5384	94.5568	0.223497	0.262413	79.0162	11.656	0.061339	1.8363	0.547829	0.685376	0.267937	0	94.5568	0.004632	0.006864	0.007307	0.006607	0.008058	0.024854	0.013597	0	0	0.007727	0.009272	0.015632	0.012483	0.013362	0.031974	0.019025	0	0	-8333
zircon-4 to glass	13	40	15	50	3	244	6.32456	0.13196	0.050891	0.041891	36.596	6.13196	0.02951	1.41204	0.348853	0.510085	1.53742	48.3115	95.0601	0.220117	0.068744	78.2919	11.5862	0.048936	1.81658	0.488115	0.687583	1.85197	0	95.0601	0.0045	0.006844	0.007197	0.006333	0.007997	0.024016	0.023882	0	0	0.007506	0.009245	0.015396	0.011966	0.013261	0.030896	0.033415	0	0	-8330
zircon-4 to glass	13	40	15	50	3	245	9.15298	0.134394	0.040642	0.036642	36.9906	6.20335	0.036979	1.38207	0.3451	0.488827	1.34496	48.7707	95.7377	0.224177	0.054899	79.1362	11.7211	0.061323	1.77803	0.482865	0.658928	1.62013	-1e-05	95.7377	0.004549	0.007005	0.007257	0.006455	0.008035	0.024081	0.020671	0	0	0.007588	0.009462	0.015524	0.012197	0.013325	0.03098	0.028923	0	0	-8328
zircon-4 to glass	13	40	15	50	3	246	12.3153	0.122569	0.044561	0.042161	35.2289	5.88449	0.035677	1.36669	0.324921	0.433037	1.35879	46.4434	91.243	0.204451	0.060193	75.3672	11.1186	0.059164	1.75824	0.45463	0.583724	1.63678	0	91.243	0.004563	0.006893	0.007084	0.006307	0.008015	0.023276	0.033154	0	0	0.007611	0.00931	0.015156	0.011917	0.013292	0.029945	0.046389	0	0	-8325
zircon-4 to glass	13	40	15	50	3	247	15.4775	0.131245	0.047559	0.046059	36.8981	6.02719	0.031495	1.42809	0.373364	0.493203	1.41703	48.5461	95.3934	0.218925	0.064242	78.9383	11.3883	0.052229	1.83724	0.522412	0.664826	1.70695	0	95.3934	0.004473	0.006972	0.007356	0.006453	0.008296	0.023484	0.021793	0	0	0.007461	0.009418	0.015737	0.012193	0.013758	0.030212	0.030493	0	0	-8322
zircon-4 to glass	13	40	15	50	3	248	18.6398	0.135027	0.045932	0.044832	37.2026	6.15029	0.032903	1.42521	0.369015	0.444771	1.27412	48.9567	96.0365	0.225233	0.062045	79.5896	11.6209	0.054564	1.83352	0.516327	0.599541	1.53479	4e-06	96.0365	0.00441	0.006885	0.007411	0.006585	0.00795	0.023543	0.023905	0	0	0.007356	0.009301	0.015855	0.012442	0.013183	0.030288	0.033448	0	0	-8319
zircon-4 to glass	13	40	15	50	3	249	20.8759	0.127224	0.045363	0.044463	38.6249	6.40636	0.045414	1.43804	0.335775	-0.85007	0.578716	50.2054	96.9571	0.212218	0.061276	82.6325	12.1047	0.07531	1.85003	0.469817	-1.1459	0.697117	0	96.9571	0.004701	0.007201	0.007301	0.006349	0.007943	0.024594	0.029287	0	0	0.007842	0.009727	0.01562	0.011997	0.013173	0.03164	0.040979	0	0	-8317
zircon-4 to glass	13	40	15	50	3	250	24.0382	0.122826	0.04096	0.048626	37.2049	6.20571	0.035709	1.37235	0.335546	0.443227	1.16653	48.9495	95.8773	0.204881	0.055329	79.5946	11.7256	0.059216	1.76552	0.469496	0.59746	1.4052	8e-06	95.8773	0.004607	0.006983	0.007422	0.006545	0.00816	0.024591	0.031642	0	0	0.007686	0.009433	0.015878	0.012366	0.013531	0.031636	0.044274	0	0	-8314
zircon-4 to glass	13	40	15	50	3	251	27.6437	0.133644	0.045289	0.038609	36.8813	6.21737	0.031498	1.38629	0.384622	0.49105	1.29226	48.6631	95.5264	0.222925	0.061177	78.9023	11.7476	0.052234	1.78346	0.538164	0.661924	1.55665	8e-06	95.5264	0.004659	0.006841	0.007211	0.006411	0.008116	0.024361	0.020654	0	0	0.007772	0.009241	0.015428	0.012114	0.013458	0.031341	0.028899	0	0	-8311
zircon-4 to glass	13	40	15	50	3	252	30.806	0.129612	0.041444	0.046406	36.7626	6.1913	0.03746	1.37597	0.336432	0.484404	1.29807	48.4813	95.1386	0.2162	0.055983	78.6484	11.6984	0.06212	1.77018	0.470736	0.652966	1.56364	0	95.1386	0.004719	0.006798	0.007175	0.006445	0.007648	0.024175	0.031647	0	0	0.007871	0.009183	0.015349	0.012178	0.012683	0.031102	0.04428	0	0	-8308
zircon-4 to glass	13	40	15	50	3	253	33.0421	0.128596	0.041914	0.042164	37.4498	6.40242	0.034499	1.4084	0.361244	0.355291	0.964805	49.3556	96.5025	0.214506	0.056618	80.1185	12.0973	0.057209	1.8119	0.505453	0.478924	1.1622	-1e-05	96.5025	0.004587	0.006975	0.007316	0.006451	0.008042	0.0238	0.020596	0	0	0.007651	0.009422	0.015652	0.012188	0.013336	0.030618	0.028818	0	0	-8306
zircon-4 to glass	13	40	15	50	3	254	36.2043	0.132177	0.039506	0.00233	36.9843	6.26279	0.031145	1.43229	0.327788	0.456771	1.13019	48.7631	95.56	0.22048	0.053365	79.1227	11.8334	0.051647	1.84263	0.458642	0.615717	1.36142	0	95.56	0.004688	0.007057	0.007316	0.006489	0.008391	0.021905	0.026729	0	0	0.00782	0.009532	0.015652	0.01226	0.013914	0.028181	0.037399	0	0	-8303
zircon-4 to glass	13	40	15	50	3	255	39.3666	0.131612	0.04116	-0.0042	37.0042	6.17271	0.04338	1.43619	0.366001	0.419266	0.884161	48.6668	95.1654	0.219537	0.055598	79.1651	11.6632	0.071937	1.84766	0.512109	0.565161	1.06505	4e-06	95.1654	0.004542	0.007082	0.007173	0.006535	0.007933	0.023528	0.02066	0	0	0.007577	0.009567	0.015346	0.012349	0.013156	0.030269	0.028908	0	0	-8300
zircon-4 to glass	13	40	15	50	3	256	42.9722	0.129079	0.039348	-0.00071	36.3584	6.13271	0.039678	1.39696	0.313291	-0.85007	0.981938	47.4366	91.9779	0.215311	0.053152	77.7835	11.5877	0.065798	1.79718	0.438358	-1.1459	1.18284	0	91.9779	0.004489	0.007073	0.007323	0.006359	0.007909	0.024097	0.030911	0	0	0.007489	0.009554	0.015668	0.012016	0.013116	0.031001	0.043251	0	0	-8297
zircon-4 to glass	13	40	15	50	3	257	45.2082	0.131754	0.038972	0.005049	37.5763	6.27548	0.036045	1.47317	0.329381	0.326128	0.89286	49.3699	96.45	0.219773	0.052644	80.3892	11.8574	0.059773	1.89522	0.460871	0.439613	1.07553	0	96.45	0.004493	0.007083	0.007454	0.006591	0.008137	0.02356	0.024883	0	0	0.007495	0.009568	0.015946	0.012453	0.013493	0.030309	0.034816	0	0	-8295
zircon-4 to glass	13	40	15	50	3	258	48.3705	0.128481	0.049518	-0.00259	37.299	6.13094	0.036349	1.41764	0.323598	0.375532	1.08915	48.9663	95.8165	0.214313	0.066888	79.796	11.5843	0.060278	1.82379	0.452779	0.506209	1.31198	4e-06	95.8165	0.004537	0.006842	0.007408	0.006398	0.008117	0.023554	0.033876	0	0	0.007567	0.009242	0.015849	0.012089	0.013461	0.030302	0.0474	0	0	-8292
zircon-4 to glass	13	40	15	50	3	259	51.5328	0.131906	0.043159	0.014005	36.7421	6.18011	0.032409	1.4082	0.295832	0.51892	1.33318	48.459	95.1448	0.220027	0.058299	78.6045	11.6772	0.053744	1.81164	0.413929	0.699493	1.60594	8e-06	95.1448	0.004565	0.006827	0.007217	0.006519	0.008167	0.02417	0.036626	0	0	0.007615	0.009222	0.01544	0.012318	0.013543	0.031094	0.051248	0	0	-8289
zircon-4 to glass	13	40	15	50	3	260	54.6951	0.126042	0.036558	0.041712	36.9746	6.26024	0.028037	1.42018	0.308792	0.479919	1.28701	48.7716	95.693	0.210245	0.049383	79.1019	11.8286	0.046493	1.82706	0.432062	0.64692	1.55032	4e-06	95.693	0.004696	0.007007	0.007346	0.006285	0.008208	0.025076	0.037895	0	0	0.007833	0.009465	0.015716	0.011876	0.013611	0.032261	0.053023	0	0	-8286
zircon-4 to glass	13	40	15	50	3	261	56.9311	0.128704	0.038094	0.040732	37.2596	6.37039	0.034265	1.47895	0.408781	0.427033	1.05612	49.1919	96.3938	0.214685	0.051457	79.7117	12.0367	0.056822	1.90266	0.571967	0.575631	1.2722	0	96.3938	0.004652	0.007016	0.00729	0.006409	0.008128	0.022977	0	0	0	0.007759	0.009477	0.015597	0.01211	0.013479	0.02956	0	0	0	-8284
zircon-4 to glass	13	40	15	50	3	262	60.5367	0.124617	0.038087	0.018191	36.9659	6.24645	0.038179	1.39569	0.330248	0.470111	1.33997	48.7647	95.7139	0.207869	0.051448	79.0833	11.8026	0.063312	1.79555	0.462084	0.633698	1.61411	0	95.7139	0.004741	0.006796	0.007425	0.006655	0.007842	0.023636	0.028493	0	0	0.007908	0.00918	0.015885	0.012575	0.013004	0.030408	0.039868	0	0	-8281
zircon-15 to glass			15	200	5		5	0.14	0.0898	0.08106	35.1	5.86	0.05	1.74	0.39	2.33	4.23	47.98	97.98	0.24		75.09	11.07	0.08	2.49	0.55	3.14	5.1		97.98	0.0394	0.0115	0.0611	0.0428	0.0351	0.1089	0.0694	0.1006	0.0744										4029
zircon-15 to glass			15	200	5		10	0.16	0.0555	0.05198	35.34	5.92	0.06	1.76	0.37	2.26	4.06	48.23	98.25	0.26		75.61	11.19	0.1	2.52	0.51	3.05	4.89		98.25	0.0375	0.0115	0.0598	0.0426	0.0319	0.0999	0.0743	0.0697	0.0904										4034
zircon-15 to glass			15	200	5		15	0.13	0.058	0.0561	35.34	5.88	0.04	1.68	0.4	2.19	4.16	48.16	98.11	0.22		75.61	11.11	0.07	2.4	0.56	2.95	5.01		98.11	0.0385	0.0115	0.0573	0.0418	0.0351	0.1056	0.0609	0.0814	0.0797										4039
zircon-15 to glass			15	200	5		20	0.13	0.043	0.0418	33.21	5.4	0.03	1.51	2.26	1.9	3.98	47.81	97.88	0.22		71.04	10.21	0.05	2.16	3.16	2.56	4.79		97.88	0.0386	0.0116	0.0582	0.0429	0.0367	0.1162	0.0785	0.1101	0.0725										4044
zircon-15 to glass			15	200	5		25	0.12	0.0459	0.04507	35.04	5.91	0.04	1.56	0.34	2.06	4.22	47.69	97.03	0.21		74.97	11.17	0.07	2.24	0.47	2.77	5.08		97.03	0.0403	0.0115	0.0652	0.0432	0.0373	0.1196	0.0869	0.0813	0.0797										4049
zircon-15 to glass			15	200	5		30	0.13	0.0521	0.05148	31.18	5.05	0.04	1.47	0.34	1.56	3.42	42.15	85.37	0.21		66.71	9.53	0.07	2.1	0.47	2.1	4.12		85.37	0.0347	0.0115	0.058	0.0435	0.0334	0.1076	0.0728	0.0759	0.0765										4054
zircon-15 to glass			15	200	5		35	0.13	0.0337	0.03322	35.23	5.9	0.04	1.76	0.43	1.96	4.17	48.01	97.74	0.21		75.36	11.15	0.07	2.51	0.59	2.64	5.02		97.74	0.0406	0.0125	0.0669	0.0453	0.0373	0.1075	0.0801	0.101	0.078										4059
zircon-23 to glass			15	200	5		4.57	0.13	0.1121	0.10238	35.13	5.82	0.03	1.18	0.33	2.66	4.14	47.73	97.17	0.22		75.15	11	0.04	1.69	0.46	3.58	4.99		97.17	0.037	0.0119	0.0616	0.0433	0.0382	0.1182	0.0775	0.0752	0.0635										-4269
zircon-23 to glass			15	200	5		9.14	0.15	0.0537	0.0497	34.99	5.85	0.02	1.33	0.36	2.61	4.15	47.67	97.17	0.24		74.85	11.05	0.04	1.9	0.5	3.52	4.99		97.17	0.036	0.0119	0.0657	0.0404	0.0344	0.1197	0.0759	0.1126	0.0933										-4271
zircon-23 to glass			15	200	5		13.72	0.11	0.0446	0.04241	35.12	5.86	0.05	1.21	0.31	2.47	4.15	47.71	97.02	0.18		75.14	11.07	0.07	1.74	0.44	3.33	5		97.02	0.0384	0.0119	0.0615	0.0456	0.0373	0.1197	0.087	0.0808	0.0919										-4273
zircon-23 to glass			15	200	5		18.29	0.12	0.0429	0.04151	35.09	5.82	0.06	1.26	0.27	2.29	4.12	47.57	96.62	0.2		75.07	10.99	0.09	1.8	0.38	3.09	4.96		96.62	0.0398	0.012	0.0585	0.0432	0.0334	0.1021	0.0896	0.0627	0.0782										-4275
zircon-23 to glass			15	200	5		22.86	0.12	0.0426	0.04164	35.03	5.96	0.03	1.25	0.33	2.38	4.18	47.68	97.01	0.2		74.95	11.27	0.04	1.79	0.46	3.21	5.03		97.01	0.0374	0.012	0.0619	0.0442	0.0394	0.1163	0.0816	0.0957	0.0765										-4277
zircon-23 to glass			15	200	5		27.43	0.14	0.0471	0.04639	34.81	6.06	0.03	1.27	0.43	2.59	4.13	47.64	97.16	0.23		74.46	11.46	0.04	1.81	0.6	3.49	4.98		97.16	0.0381	0.0119	0.0591	0.0411	0.0388	0.1129	0.0744	0.1002	0.0875										-4279
zircon-23 to glass			15	200	5		32	0.11	0.0445	0.04395	34.82	6.09	0.04	1.26	0.35	2.67	4.14	47.7	97.28	0.19		74.5	11.52	0.07	1.81	0.49	3.6	4.98		97.28	0.0368	0.0119	0.0656	0.046	0.0367	0.1129	0.0774	0.1043	0.0781										-4281
zircon-23 to glass			15	200	5		36.57	0.06	0.0507	0.05026	32.65	8.5	0.02	0.74	0.85	4.09	3.65	47.66	98.26	0.1		69.86	16.07	0.03	1.06	1.19	5.51	4.39		98.26	0.038	0.0119	0.0615	0.0417	0.0353	0.1076	0.0815	0.1027	0.0813										-4283
zircon-23 to glass			15	200	5		41.15	0.02	0.0483	0.04794	31.09	9.97	0	0.5	1.08	5.28	3.51	47.53	99.04	0.03		66.52	18.83	0	0.72	1.51	7.12	4.22		99.04	0.0394	0.0119	0.0601	0.0488	0	0.1075	0.0814	0.0839	0.0762										-4285
zircon-23 to glass-2			15	200	5		0	0.13	0.0374	0	35.42	6.06	0.03	1.3	0.38	2.56	4.29	48.35	98.55	0.22		75.78	11.46	0.04	1.86	0.54	3.45	5.17		98.55	0.0367	0.0118	0.0614	0.0429	0.0382	0.1174	0.0788	0.0921	0.0777										-4244
zircon-23 to glass-2			15	200	5		5.04	0.03	0.0009	0	32.02	9.16	0	0.47	0.74	4.42	4.16	47.56	98.6	0.04		68.51	17.31	0	0.67	1.04	5.95	5.02		98.6	0.0371	0.0118	0.0572	0.0478	0.0342	0.0816	0.0767	0.0965	0.0612										-4240.1
zircon-23 to glass-2			15	200	5		10.09	0	0	0	30.84	10.39	0.01	0.18	1.05	5.45	3.78	47.56	99.29	0		65.97	19.63	0.02	0.26	1.46	7.35	4.55		99.29	0	0	0.0572	0.0444	0.0316	0.1103	0.0702	0.0712	0.0662										-4236.2
zircon-23 to glass-2			15	200	5		15.13	0.01	0	0	30.85	10.12	0	0.22	1.07	5.2	3.82	47.28	98.6	0.01		65.99	19.13	0	0.31	1.5	7.01	4.61		98.6	0.035	0	0.0519	0.0431	0	0.1174	0.0801	0.1058	0.0738										-4232.3
zircon-23 to glass-2			15	200	5		20.18	0.03	0	0	30.92	9.94	0	0.5	1.05	5.44	3.58	47.35	98.81	0.04		66.15	18.78	0	0.72	1.47	7.33	4.32		98.81	0.0358	0	0.0585	0.0461	0	0.0944	0.0701	0.0994	0.0793										-4228.4
zircon-23 to glass-2			15	200	5		25.22	0.08	0.0279	0.02708	33.79	7.37	0.01	1.08	0.58	3.37	3.97	47.84	98.16	0.13		72.29	13.93	0.02	1.54	0.82	4.54	4.78		98.16	0.0361	0.0119	0.0577	0.0449	0.0425	0.1026	0.0801	0.1014	0.0679										-4224.5
zircon-23 to glass-2			15	200	5		30.27	0.13	0.0379	0.03729	35.56	5.99	0.05	1.33	0.33	2.49	4.19	48.41	98.54	0.22		76.07	11.31	0.08	1.9	0.46	3.35	5.05		98.54	0.038	0.0118	0.0575	0.0444	0.0346	0.0944	0.069	0.0987	0.0835										-4220.6
zircon-23 to glass-2			15	200	5		35.31	0.11	0.043	0.04253	35.54	5.96	0.03	1.29	0.34	2.24	4.28	48.25	98.09	0.18		76.04	11.26	0.05	1.85	0.47	3.02	5.16		98.09	0.0392	0.0117	0.0601	0.0434	0.0382	0.1088	0.0676	0.095	0.063										-4216.7
zircon-23 to glass-2			15	200	5		40.36	0.12	0.0363	0.03593	35.52	5.89	0.03	1.28	0.34	2.34	4.26	48.19	98.01	0.21		75.99	11.13	0.05	1.83	0.47	3.16	5.13		98.01	0.0376	0.0117	0.0558	0.0392	0.0364	0.1057	0.0767	0.0987	0.0768										-4212.8
zircon-23 to glass-2			15	200	5		45.4	0.13	0.0369	0.0366	35.33	5.98	0.04	1.4	0.35	2.2	4.03	48.05	97.57	0.22		75.58	11.3	0.07	2	0.49	2.96	4.86		97.57	0.0381	0.0117	0.0603	0.0417	0.0352	0.0909	0.0716	0.0989	0.0695										-4208.9
zircon-23 to glass-2			15	200	5		50.45	0.14	0.0339	0.03365	35.44	5.84	0.04	1.32	0.3	2.44	4.13	48.08	97.75	0.24		75.81	11.04	0.07	1.89	0.42	3.29	4.98		97.75	0.0374	0.0118	0.0583	0.0432	0.0311	0.0961	0.0778	0.0911	0.0796										-4205
zircon-32 to glass			15	200	5		0	0.1	0.0999	0.05745	33.35	7.69	0.08	1.65	1.99	3.08	1.91	47.98	97.92	0.17		71.35	14.53	0.13	2.36	2.79	4.15	2.3		97.92	0.0375	0.0117	0.0609	0.0446	0.035	0.1171	0.085	0.1011	0.0569										-3975
zircon-32 to glass			15	200	5		4.98	0.13	0.0511	0.04232	35.05	5.82	0.1	1.87	0.79	2.5	2.55	47.81	96.67	0.22		74.99	11	0.17	2.67	1.1	3.37	3.07		96.67	0.0362	0.0119	0.0605	0.0399	0.0304	0.083	0.074	0.1011	0.0824										-3973.1
zircon-32 to glass			15	200	5		9.95	0.13	0.054	0.05045	35.17	5.9	0.08	1.83	0.78	2.44	2.56	47.97	96.98	0.22		75.24	11.15	0.14	2.62	1.09	3.29	3.09		96.98	0.0371	0.0117	0.0575	0.0438	0.0369	0.1016	0.0874	0.0586	0.0741										-3971.2
zircon-32 to glass			15	200	5		14.93	0.15	0.0471	0.04518	35.16	5.73	0.08	1.89	0.83	2.7	2.44	47.93	96.96	0.25		75.22	10.82	0.14	2.7	1.17	3.64	2.94		96.96	0.036	0.0117	0.0597	0.0446	0.0383	0.1068	0.0731	0.0979	0.0646										-3969.2
zircon-32 to glass			15	200	5		19.91	0.15	0.0453	0.04409	35.21	5.88	0.09	1.79	0.81	2.43	2.48	48	96.92	0.25		75.33	11.11	0.15	2.56	1.13	3.28	2.99		96.92	0.0375	0.0117	0.0573	0.0421	0.0363	0.1115	0.0732	0.098	0.0816										-3967.3
zircon-32 to glass			15	200	5		24.88	0.15	0.0374	0.03656	35.41	5.92	0.08	1.85	0.8	2.62	2.56	48.35	97.8	0.25		75.76	11.19	0.14	2.65	1.11	3.53	3.08		97.8	0.0375	0.0118	0.0573	0.0392	0.035	0.102	0.0691	0.0587	0.0788										-3965.4
zircon-32 to glass			15	200	5		29.86	0.13	0.0438	0.04318	35.22	5.83	0.09	1.84	0.83	2.14	2.45	47.88	96.5	0.22		75.35	11.02	0.15	2.63	1.16	2.88	2.96		96.5	0.0365	0.0117	0.0592	0.0388	0.0328	0.0969	0.0746	0.0652	0.0831										-3963.5
zircon-32 to glass			15	200	5		34.83	0.13	0.0423	0.04182	34.93	5.83	0.07	1.91	0.74	2.62	2.55	47.7	96.53	0.22		74.74	11.02	0.12	2.74	1.04	3.53	3.07		96.53	0.0352	0.0118	0.0592	0.0431	0.0414	0.1037	0.0719	0.076	0.0803										-3961.5
zircon-32 to glass			15	200	5		39.81	0.11	0.0439	0.04352	34.45	6.58	0.09	1.78	1.42	2.76	2.33	48.04	97.65	0.19		73.71	12.44	0.15	2.54	1.99	3.73	2.81		97.65	0.0388	0.0118	0.0598	0.0409	0.0291	0.126	0.0771	0.094	0.0788										-3959.6
zircon-32 to glass			15	200	5		44.79	0.13	0.0453	0.04499	34.2	6.7	0.08	1.63	1.46	2.76	2.26	47.81	97.1	0.22		73.18	12.65	0.13	2.33	2.04	3.72	2.72		97.1	0.035	0.0116	0.061	0.0431	0.0322	0.1147	0.0771	0.0978	0.0728										-3957.7
zircon-32 to glass			15	200	5		49.76	0.13	0.0337	0.03344	35.1	5.99	0.08	1.94	0.95	2.77	2.52	48.2	97.8	0.21		75.09	11.33	0.14	2.77	1.32	3.73	3.04		97.8	0.0347	0.0118	0.0524	0.04	0.0352	0.0969	0.0719	0.0651	0.0647										-3955.8
zircon-32 to glass			15	200	5		54.74	0.12	0.0367	0.03648	35.24	5.92	0.07	1.75	0.93	2.25	2.63	48.03	97.02	0.2		75.39	11.19	0.12	2.5	1.3	3.03	3.17		97.02	0.0369	0.0118	0.0574	0.046	0.0329	0.1022	0.0693	0.0761	0.0714										-3953.8
zircon-32 to glass			15	200	5		59.72	0.15	0.0427	0.04251	35.35	5.96	0.1	1.84	0.75	2.72	2.6	48.36	97.92	0.25		75.63	11.26	0.16	2.63	1.06	3.67	3.13		97.92	0.0355	0.0117	0.0538	0.0422	0.0322	0.1038	0.0833	0.0855	0.0789										-3951.9
zircon-32 to glass			15	200	5		64.69	0.11	0.0383	0.03814	32.78	8.44	0.05	1.39	2.47	3.33	1.73	48.07	98.4	0.18		70.14	15.95	0.09	1.99	3.46	4.48	2.09		98.4	0.0336	0.0118	0.0569	0.0458	0.0373	0.0839	0.0843	0.1013	0.0829										-3950
zircon-32 to glass			15	200	5		69.67	0.1	0.0324	0.03226	32.36	8.42	0.05	1.35	2.26	3.6	1.68	47.55	97.39	0.17		69.22	15.9	0.09	1.93	3.16	4.86	2.03		97.39	0.0361	0.0118	0.0567	0.0408	0.0366	0.0952	0.0875	0.0971	0.0815										-3948.1
zircon-32 to glass			15	200	5		74.65	0.07	0.0342	0.03408	30.43	10.18	0.03	1.06	3.47	4.01	1.21	47.29	97.78	0.11		65.11	19.23	0.06	1.51	4.85	5.41	1.46		97.78	0.0346	0.0118	0.06	0.044	0.0386	0.1037	0.0767	0.1004	0.0709										-3946.2
zircon-32 to glass			15	200	5		79.62	0.03	0.0335	0.03339	29.87	10.93	0.03	0.8	3.82	4.45	0.93	47.43	98.32	0.05		63.9	20.65	0.05	1.14	5.35	6	1.12		98.32	0.0384	0.0118	0.0533	0.0441	0.0339	0.1054	0.0873	0.1169	0.0839										-3944.2
zircon-32 to glass			15	200	5		84.6	0.01	0.0432	0.0431	29.42	11.88	0.03	0.84	4.37	4.61	0.59	47.98	99.77	0.02		62.94	22.44	0.06	1.2	6.11	6.22	0.71		99.77	0.0363	0.0117	0.0519	0.0444	0.0325	0.0951	0.0914	0.096	0.0782										-3942.3
zircon-32 to glass			15	200	5		89.57	0.12	0.0386	0.03851	34.99	6.06	0.07	1.84	0.88	2.56	2.47	47.94	96.98	0.21		74.86	11.46	0.11	2.64	1.22	3.45	2.97		96.98	0.0383	0.0118	0.055	0.0419	0.0426	0.0987	0.0719	0.09	0.0745										-3940.4
zircon-32 to glass			15	200	5		94.55	0.13	0.0405	0.04042	35.36	5.72	0.09	1.85	0.77	2.66	2.44	48.08	97.18	0.21		75.65	10.8	0.14	2.65	1.08	3.58	2.94		97.18	0.0375	0.0117	0.0605	0.0422	0.0364	0.1205	0.0832	0.0759	0.0681										-3938.5
zircon-32 to glass			15	200	5		99.53	0.12	0.0386	0.03853	35.28	5.95	0.07	1.81	0.74	2.24	2.54	48.04	96.89	0.2		75.47	11.24	0.12	2.59	1.03	3.02	3.06		96.89	0.0377	0.0117	0.0558	0.0433	0.0356	0.1147	0.0867	0.1058	0.0845										-3936.5
zircon-37 to glass			15	200	5		5.02	0.08	0.054	0.045	35.95	5.97	0.02	1.48	0.34	0.64	3.62	48.09	96.24	0.14	0.0729	76.91	11.28	0.03	2.12	0.48	0.86	4.36	0	96.24	0.00039	0.0115	0.0561	0.04	0.0376	0.1147	0.0801	0.08	0.0673	0.000156391	0.00298643	0.120214	0.0755819	0.014928	0.0344962	0.11214	0.10785	0.0811051	-8766.3
zircon-37 to glass			15	200	5		10.05	0.1	0.0403	0.037	35.54	5.81	0	1.37	0.3	1.1	3.97	47.66	95.94	0.17	0.0544	76.03	10.98	0	1.95	0.42	1.48	4.78	0	95.94	0.00037	0.0115	0.0575	0.0443	0	0.1056	0.0859	0.0844	0.072	0.000148371	0.00298643	0.123214	0.083707	0	0.0317594	0.12026	0.113782	0.0867692	-8769.7
zircon-37 to glass			15	200	5		15.07	0.08	0.0399	0.038	35.31	5.89	0.05	1.36	0.27	1.99	4.1	47.81	96.94	0.13	0.0539	75.54	11.12	0.08	1.95	0.38	2.68	4.93	0	96.94	0.000382	0.0116	0.0567	0.0437	0.0314	0.1117	0.0859	0.0884	0.0909	0.000153183	0.0030124	0.1215	0.0825732	0.0124665	0.033594	0.12026	0.119175	0.109546	-8773
zircon-37 to glass			15	200	5		20.09	0.09	0.0389	0.038	35.42	5.9	0.03	1.38	0.31	2.06	4.04	48	97.37	0.16	0.0525	75.77	11.14	0.05	1.97	0.44	2.78	4.86	0	97.37	0.000385	0.0115	0.063	0.04	0.0336	0.0991	0.0776	0.0747	0.075	0.000154386	0.00298643	0.135	0.0755819	0.01334	0.0298045	0.10864	0.100705	0.0903846	-8776.3
zircon-37 to glass			15	200	5		25.11	0.1	0.0337	0.033	35.22	5.94	0.02	1.53	0.29	1.97	4	47.78	96.88	0.16	0.0455	75.36	11.22	0.03	2.18	0.4	2.65	4.82	0	96.88	0.000354	0.0116	0.0564	0.0454	0.0387	0.1071	0.0712	0.0696	0.0846	0.000141955	0.0030124	0.120857	0.0857855	0.0153648	0.0322105	0.09968	0.0938298	0.101954	-8779.7
zircon-37 to glass			15	200	5		30.14	0.1	0.0329	0.032	35.25	5.96	0.02	1.49	0.33	2.13	4.06	47.92	97.35	0.17	0.0444	75.42	11.25	0.03	2.14	0.46	2.88	4.89	0	97.35	0.000362	0.0115	0.0601	0.0407	0.0399	0.1071	0.0776	0.104	0.0688	0.000145163	0.00298643	0.128786	0.0769046	0.0158412	0.0322105	0.10864	0.140205	0.0829128	-8783
zircon-37 to glass			15	200	5		35.16	0.08	0.046	0.046	35.35	5.82	0.05	1.37	0.3	2.17	4.06	47.85	97.1	0.14	0.0621	75.62	10.99	0.09	1.96	0.42	2.92	4.89	0	97.1	0.000382	0.0116	0.0593	0.0435	0.0322	0.0991	0.0777	0.084	0.0921	0.000153183	0.0030124	0.127071	0.0821953	0.0127841	0.0298045	0.10878	0.113243	0.110992	-8786.3
zircon-37 to glass			15	200	5		40.18	0.13	0.0359	0.036	35.41	5.82	0.05	1.47	0.27	2.04	3.96	47.94	97.19	0.21	0.0485	75.76	11	0.08	2.1	0.37	2.75	4.77	0	97.19	0.000345	0.0115	0.0578	0.0431	0.0343	0.0974	0.0751	0.0842	0.0833	0.000138346	0.00298643	0.123857	0.0814395	0.0136179	0.0292932	0.10514	0.113512	0.100387	-8789.7
zircon-37 to glass			15	200	5		45.2	0.09	0.0323	0.032	35.18	6.02	0.04	1.37	0.36	2.18	4.06	47.86	97.24	0.15	0.0436	75.25	11.38	0.07	1.96	0.51	2.94	4.89	0	97.24	0.000371	0.0116	0.0619	0.0381	0.0329	0.1087	0.0699	0.0695	0.0735	0.000148772	0.0030124	0.132643	0.0719918	0.013062	0.0326917	0.09786	0.093695	0.0885769	-8793
zircon-37 to glass			15	200	5		50.23	0.08	0.0328	0.033	35.14	5.98	0.01	1.44	0.3	2.26	4.15	47.83	97.27	0.14	0.0443	75.19	11.29	0.01	2.07	0.42	3.04	5	0	97.27	0.000392	0.0115	0.0592	0.0404	0.04	0.1024	0.0824	0.1002	0.0749	0.000157193	0.00298643	0.126857	0.0763377	0.0158809	0.030797	0.11536	0.135083	0.0902641	-8796.3
zircon-37 to glass			15	200	5		55.25	0.12	0.0305	0.03	35.49	5.91	0.04	1.32	0.4	1.9	4.04	48.05	97.32	0.21	0.0412	75.92	11.16	0.06	1.88	0.57	2.56	4.86	0	97.32	0.000347	0.0115	0.0583	0.0403	0.0349	0.1117	0.0712	0.0884	0.0704	0.000139148	0.00298643	0.124929	0.0761488	0.0138561	0.033594	0.09968	0.119175	0.084841	-8799.7
zircon-37 to glass			15	200	5		60.27	0.11	0.042	0.042	35.47	5.97	0.04	1.42	0.38	2.12	3.95	48.15	97.66	0.18	0.0567	75.89	11.27	0.06	2.03	0.53	2.85	4.76	0	97.66	0.000359	0.0115	0.0593	0.0455	0.0343	0.1072	0.0699	0.064	0.0859	0.00014396	0.00298643	0.127071	0.0859744	0.0136179	0.0322406	0.09786	0.0862802	0.103521	-8803
zircon-37 to glass			15	200	5		65.29	0.1	0.0304	0.03	35.15	5.91	0.04	1.59	0.35	2.08	4	47.78	97.04	0.17	0.041	75.2	11.16	0.06	2.27	0.49	2.8	4.82	0	97.04	0.000356	0.0115	0.0572	0.0455	0.0369	0.1056	0.0858	0.1041	0.0735	0.000142757	0.00298643	0.122571	0.0859744	0.0146501	0.0317594	0.12012	0.14034	0.0885769	-8806.3
zircon-37 to glass			15	200	5		70.32	0.09	0.0357	0.036	35.09	5.86	0.03	1.55	0.29	2.24	4.12	47.71	97.07	0.15	0.0482	75.07	11.08	0.05	2.22	0.4	3.02	4.97	0	97.07	0.000383	0.0115	0.0535	0.0426	0.0351	0.0973	0.0858	0.0796	0.0704	0.000153584	0.00298643	0.114643	0.0804947	0.0139355	0.0292632	0.12012	0.107311	0.084841	-8809.7
zircon-37 to glass			15	200	5		75.34	0.08	0.0359	0.036	35.04	5.81	0.03	1.48	0.33	2.11	3.91	47.5	96.37	0.14	0.0485	74.97	10.98	0.05	2.12	0.47	2.84	4.71	0	96.37	0.000369	0.0115	0.0601	0.0432	0.0343	0.1007	0.0764	0.0926	0.075	0.00014797	0.00298643	0.128786	0.0816285	0.0136179	0.0302857	0.10696	0.124837	0.0903846	-8813
zircon-37 to glass			15	200	5		80.36	0.1	0.032	0.032	35.38	5.93	0.04	1.36	0.29	2.12	4.06	47.96	97.24	0.16	0.0432	75.69	11.21	0.06	1.94	0.4	2.86	4.89	0	97.24	0.000376	0.0116	0.0569	0.044	0.0416	0.1102	0.0881	0.0794	0.082	0.000150777	0.0030124	0.121929	0.0831401	0.0165161	0.0331429	0.12334	0.107041	0.0988205	-8816.3
zircon-37 to glass			15	200	5		85.38	0.12	0.0289	0.029	35.06	5.75	0.03	1.4	0.34	2.17	4.1	47.52	96.56	0.2	0.039	75.01	10.86	0.06	2	0.48	2.92	4.93	0	96.56	0.000364	0.0122	0.0544	0.0371	0.0337	0.1102	0.0726	0.1003	0.0688	0.000145965	0.00316821	0.116571	0.0701022	0.0133797	0.0331429	0.10164	0.135217	0.0829128	-8819.7
zircon-38 to glass			15	200	5		0	0.11	0.0541	0.01165	35.63	5.98	0.04	2.02	0.32	2.36	4.14	48.71	99.41	0.18		76.23	11.31	0.07	2.89	0.44	3.18	4.98		99.41	0.0371	0.0117	0.0591	0.0436	0.0336	0.1051	0.0772	0.0761	0.0828										-7927
zircon-38 to glass			15	200	5		5.13	0.12	0.0411	0.03262	35.92	5.87	0.02	1.94	0.29	2.17	4.07	48.79	99.26	0.19		76.84	11.09	0.04	2.78	0.41	2.92	4.9		99.26	0.0371	0.012	0.0589	0.0427	0.0358	0.1056	0.0848	0.0753	0.0834										-7924.9
zircon-38 to glass			15	200	5		10.27	0.14	0.0434	0.04001	35.44	5.89	0.04	1.96	0.33	2.43	4.11	48.43	98.84	0.23		75.83	11.13	0.07	2.81	0.46	3.28	4.95		98.84	0.0364	0.0118	0.0598	0.0422	0.0318	0.1072	0.0671	0.0932	0.0764										-7922.8
zircon-38 to glass			15	200	5		15.4	0.1	0.0444	0.04258	34.75	5.75	0.03	1.83	0.34	2.34	3.83	47.32	96.33	0.16		74.34	10.87	0.05	2.61	0.47	3.16	4.61		96.33	0.0366	0.0118	0.0575	0.0437	0.0419	0.1204	0.0671	0.0751	0.0779										-7920.6
zircon-38 to glass			15	200	5		20.53	0.12	0.0421	0.04095	35.69	5.92	0.02	1.87	0.33	2.34	3.97	48.6	98.91	0.2		76.36	11.18	0.03	2.67	0.46	3.16	4.78		98.91	0.0359	0.0118	0.057	0.0437	0.0413	0.1057	0.0685	0.0582	0.0873										-7918.5
zircon-38 to glass			15	200	5		25.67	0.1	0.0421	0.0413	35.87	5.93	0.04	1.79	0.34	2.37	4.13	48.86	99.54	0.17		76.74	11.21	0.07	2.56	0.48	3.2	4.97		99.54	0.0377	0.0118	0.0575	0.0479	0.0359	0.0885	0.0825	0.0845	0.0689										-7916.4
zircon-38 to glass			15	200	5		30.8	0.09	0.0381	0.03751	35.51	5.93	0.03	1.76	0.32	2.4	3.97	48.36	98.4	0.14		75.97	11.21	0.04	2.52	0.44	3.23	4.78		98.4	0.0371	0.0118	0.0598	0.0403	0.0402	0.0957	0.0892	0.0929	0.0705										-7914.3
zircon-38 to glass			15	200	5		35.94	0.11	0.0383	0.03785	35.56	5.93	0.03	1.76	0.29	2.29	4.24	48.45	98.76	0.19		76.08	11.2	0.05	2.52	0.4	3.09	5.1		98.76	0.0354	0.0118	0.0619	0.0451	0.0384	0.0991	0.0944	0.108	0.0704										-7912.2
zircon-38 to glass			15	200	5		41.07	0.11	0.0363	0.03594	35.77	5.87	0.01	1.63	0.3	2.06	4.17	48.47	98.46	0.18		76.52	11.09	0.02	2.33	0.42	2.77	5.02		98.46	0.037	0.0119	0.0586	0.0364	0.0406	0.1118	0.0777	0.1007	0.0735										-7910.1
zircon-38 to glass			15	200	5		46.2	0.1	0.0413	0.041	35.58	5.95	0.03	1.64	0.36	2.16	4.21	48.39	98.44	0.16		76.12	11.25	0.04	2.34	0.5	2.91	5.07		98.44	0.0379	0.0119	0.0577	0.0456	0.0357	0.119	0.079	0.1209	0.072										-7907.9
zircon-38 to glass			15	200	5		51.34	0.1	0.0471	0.04685	35.73	5.95	0.05	1.53	0.36	2.36	4	48.58	98.73	0.17		76.44	11.25	0.09	2.19	0.5	3.18	4.82		98.73	0.0383	0.0118	0.061	0.0421	0.0301	0.094	0.0726	0.0748	0.0848										-7905.8
zircon-38 to glass			15	200	5		56.47	0.11	0.0458	0.04559	35.67	5.91	0.03	1.65	0.33	2.31	4.11	48.5	98.69	0.18		76.31	11.17	0.05	2.36	0.47	3.12	4.96		98.69	0.0365	0.0117	0.0594	0.0418	0.0358	0.0992	0.0765	0.0798	0.072										-7903.7
zircon-38 to glass			15	200	5		61.6	0.1	0.0423	0.04212	35.67	5.94	0.01	1.52	0.37	2.18	4.09	48.44	98.41	0.17		76.3	11.22	0.02	2.18	0.51	2.94	4.92		98.41	0.0354	0.0117	0.0618	0.0417	0.0406	0.1009	0.079	0.0797	0.0751										-7901.6
zircon-38 to glass			15	200	5		66.74	0.1	0.0412	0.04105	35.88	5.97	0.02	1.5	0.32	2.31	4.02	48.69	98.87	0.16		76.76	11.27	0.04	2.15	0.45	3.11	4.84		98.87	0.0355	0.0118	0.0582	0.0417	0.037	0.1245	0.0777	0.0796	0.0765										-7899.5
zircon-38 to glass			15	200	5		71.87	0.11	0.0382	0.03807	35.49	5.79	0.03	1.53	0.33	2.06	4.04	48.04	97.53	0.18		75.92	10.95	0.04	2.19	0.46	2.78	4.87		97.53	0.0373	0.0122	0.0602	0.0438	0.04	0.1073	0.0739	0.0844	0.0705										-7897.4
zircon-38 to glass			15	200	5		77	0.1	0.0395	0.03938	35.86	5.99	0.01	1.51	0.32	2.12	4.09	48.61	98.63	0.16		76.71	11.33	0.01	2.15	0.44	2.86	4.93		98.63	0.0364	0.0118	0.0575	0.0447	0.0406	0.1088	0.0778	0.0797	0.0639										-7895.2
zircon-38 to glass			15	200	5		82.14	0.08	0.0354	0.0353	36.59	6.14	0.02	1.62	0.36	0.97	3.69	49.19	98.72	0.13		78.29	11.59	0.03	2.32	0.51	1.31	4.44		98.72	0.0394	0.0119	0.0619	0.0404	0.0401	0.1009	0.0726	0.0891	0.064										-7893.1
zircon-38 to glass			15	200	5		87.27	0.09	0.0396	0.03951	35.73	5.96	0.05	1.56	0.33	1.63	4.09	48.33	97.82	0.15		76.44	11.26	0.09	2.22	0.46	2.2	4.93		97.82	0.04	0.0118	0.0571	0.041	0.0314	0.1119	0.0727	0.0888	0.0705										-7891
zircon-38 to glass			15	200	5		92.4	0.09	0.0385	0.03842	37.02	6.14	0.06	1.78	0.4	0.39	2.72	49.38	98.04	0.15		79.19	11.61	0.1	2.54	0.56	0.52	3.27		98.04	0.0388	0.0118	0.0573	0.0462	0.0288	0.0959	0.0579	0.0975	0.0837										-7888.9
zircon-38 to glass			15	200	5		97.54	0.12	0.0358	0.03573	36.05	5.91	0.05	1.67	0.37	1.55	4.01	48.7	98.5	0.2		77.13	11.18	0.09	2.38	0.52	2.09	4.83		98.5	0.0337	0.0118	0.0566	0.0474	0.0307	0.094	0.0642	0.0847	0.0821										-7886.8
[truncated: 4 more columns]

## Sheet: Table S2 EPMA (France)
IDDP-1 zircon compositions by EPMA (France)																Det.Lim ppm(A)														StdDev wt%
	Comment	Al2O3	SiO2	CaO	FeO	Y2O3	ZrO2	HfO2	P2O5	Total	Al	Si	Ca	Fe	Y	Zr	Hf	P	O	Al	Si	Ca	Fe	Y	Zr	Hf	P	O	X	Y	Z	Beam X	Beam Y	Comment	Distance (µ)	Mean Z	Point#	Date
1 / 1 .	IDDP-1 zircon1-l2	10.58	78.05	0.46	2.03	0	1.12	0	0	93.24	255	319	508	717		961				0.12	0.51	0.06	0.14	0	0.12	0	0		-8729	2238	202			IDDP-1 zircon1-l2	0	11.21	1	vendredi 7 mai 2021 05:27:17
1 / 2 .	IDDP-1 zircon1-l2	0	32.46	0	0.58	0.16	66	1.07	0.06	100.5		309		965	773	1466	779	301		0	0.25	0	0.1	0.07	0.77	0.09	0.03		-8722.1	2239.7	202			IDDP-1 zircon1-l2	7.09	25.41	2	vendredi 7 mai 2021 05:29:42
1 / 3 .	IDDP-1 zircon1-l2	0	32.77	0	0.49	0.11	66.29	0.98	0.01	100.89	262	305		958	798	1446	785	309		0.02	0.25	0	0.1	0.07	0.77	0.09	0.03		-8715.2	2241.3	202			IDDP-1 zircon1-l2	14.17	25.48	3	vendredi 7 mai 2021 05:31:53
1 / 4 .	IDDP-1 zircon1-l2	0	32.4	0	0.49	0.34	65.67	1.2	0.14	100.47		312		965	832	1482	810	312		0	0.25	0	0.1	0.08	0.77	0.1	0.03		-8708.3	2243	202			IDDP-1 zircon1-l2	21.26	25.43	4	vendredi 7 mai 2021 05:34:01
1 / 5 .	IDDP-1 zircon1-l2	0	32.02	0.02	0.49	0.28	65.49	1.07	0.15	99.71		305	674	961	808	1508	817	288		0	0.24	0.06	0.1	0.08	0.77	0.09	0.03		-8701.4	2244.7	202			IDDP-1 zircon1-l2	28.35	25.23	5	vendredi 7 mai 2021 05:36:10
1 / 6 .	IDDP-1 zircon1-l2	0	32.02	0	0.55	0.73	65.3	1.14	0.12	100		314		943	810	1502	788	341		0	0.24	0	0.1	0.09	0.77	0.09	0.03		-8694.6	2246.3	202			IDDP-1 zircon1-l2	35.44	25.31	6	vendredi 7 mai 2021 05:38:19
1 / 7 .	IDDP-1 zircon1-l2	0	32.19	0.01	0.58	0.71	64.53	1.09	0.19	99.71		309	695	950	798	1497	805	278		0	0.25	0.06	0.1	0.09	0.76	0.09	0.03		-8687.7	2248	202			IDDP-1 zircon1-l2	42.53	25.26	7	vendredi 7 mai 2021 05:40:26
1 / 8 .	IDDP-1 zircon1-l2	0	32.12	0	0.74	0.56	65.48	1.11	0.24	100.53		304		887	817	1478	793	307		0	0.24	0	0.1	0.09	0.77	0.09	0.03		-8680.8	2249.7	202			IDDP-1 zircon1-l2	49.61	25.46	8	vendredi 7 mai 2021 05:42:33
1 / 9 .	IDDP-1 zircon1-l2	1.6	48.57	15.61	13.86	0.21	9.37	0.28	0	89.85	278	295	660	921	762	1154	771			0.05	0.34	0.4	0.35	0.07	0.27	0.07	0		-8673.9	2251.3	202			IDDP-1 zircon1-l2	56.7	14.49	9	vendredi 7 mai 2021 05:44:39
1 / 10 .	IDDP-1 zircon1-l2	4.85	72.74	5.3	4.48	0	0	0	0	87.69	250	293	589	793						0.08	0.48	0.19	0.2	0	0	0	0		-8667	2253	202			IDDP-1 zircon1-l2	63.79	10.51	10	vendredi 7 mai 2021 05:46:46
2 / 1 .	IDDP-1 zircon1-l3	9.71	83.03	0.39	2.15	0	0.05	0	0	95.97	259	305	612	714		986				0.12	0.53	0.07	0.14	0	0.08	0	0		-8703	2265	202			IDDP-1 zircon1-l3	0	11.06	11	vendredi 7 mai 2021 05:48:57
2 / 2 .	IDDP-1 zircon1-l3	0	32.36	0.06	0.82	0.29	65.52	1.1	0.06	100.38		301	588	907	800	1445	821	307		0	0.25	0.05	0.1	0.08	0.77	0.09	0.03		-8701.3	2259.1	202			IDDP-1 zircon1-l3	6.12	25.36	12	vendredi 7 mai 2021 05:51:05
2 / 3 .	IDDP-1 zircon1-l3	0	31.79	0	0.61	1.18	64.57	1.03	0.25	99.72		293	646	975	834	1538	795	330		0	0.24	0.05	0.1	0.11	0.76	0.09	0.03		-8699.7	2253.2	202			IDDP-1 zircon1-l3	12.24	25.27	13	vendredi 7 mai 2021 05:53:13
2 / 4 .	IDDP-1 zircon1-l3	0	31.83	0.04	0.53	1.21	63.18	1.04	0.3	98.39		299	650	980	849	1565	790	329		0	0.24	0.06	0.1	0.11	0.75	0.09	0.03		-8698	2247.3	202			IDDP-1 zircon1-l3	18.36	24.84	14	vendredi 7 mai 2021 05:55:21
2 / 5 .	IDDP-1 zircon1-l3	0	31.87	0	0.45	0.78	64.37	1.03	0.16	99.05		320		1030	794	1498	799	303		0	0.24	0	0.1	0.09	0.76	0.09	0.03		-8696.3	2241.4	202			IDDP-1 zircon1-l3	24.48	25.11	15	vendredi 7 mai 2021 05:57:29
2 / 6 .	IDDP-1 zircon1-l3	0	32.04	0	0.47	0.53	65.66	1.07	0.14	100.19		311	660	965	819	1434	797	303		0	0.24	0.05	0.1	0.09	0.77	0.09	0.03		-8694.7	2235.6	202			IDDP-1 zircon1-l3	30.6	25.39	16	vendredi 7 mai 2021 05:59:37
2 / 7 .	IDDP-1 zircon1-l3	0	32.12	0.01	0.54	0.68	65.3	1.11	0.16	100.18		301	716	954	782	1467	781	309		0	0.24	0.06	0.1	0.09	0.77	0.09	0.03		-8693	2229.7	202			IDDP-1 zircon1-l3	36.72	25.41	17	vendredi 7 mai 2021 06:01:43
2 / 8 .	IDDP-1 zircon1-l3	0	31.78	0.06	0.69	0.53	65.5	1.09	0.15	99.85		316	657	895	843	1502	800	307		0	0.24	0.06	0.1	0.09	0.77	0.09	0.03		-8691.3	2223.8	202			IDDP-1 zircon1-l3	42.84	25.27	18	vendredi 7 mai 2021 06:03:51
2 / 9 .	IDDP-1 zircon1-l3	0.88	39.6	0.1	0.73	0.72	60.01	0.86	0.26	103.83	306	310	664	916	792	1450	805	319		0.04	0.29	0.06	0.1	0.09	0.73	0.09	0.03		-8689.7	2217.9	202			IDDP-1 zircon1-l3	48.96	24.83	19	vendredi 7 mai 2021 06:05:59
2 / 10 .	IDDP-1 zircon1-l3	11.26	79.42	0.59	2.09	0.05	0.06	0	0	94.54	247	309	519	766	678	979				0.13	0.51	0.07	0.14	0.06	0.08	0	0		-8688	2212	202			IDDP-1 zircon1-l3	55.08	11.2	20	vendredi 7 mai 2021 06:08:07
3 / 1 .	IDDP-1 zircon1-l4	11.12	78.91	0.53	2.21	0.01	0.1	0	0	94	263	319	567	731	742	988				0.13	0.51	0.07	0.14	0.06	0.09	0	0		-8687	2194	202			IDDP-1 zircon1-l4	0	11.17	21	vendredi 7 mai 2021 06:10:17
3 / 2 .	IDDP-1 zircon1-l4	6.37	47.77	0.36	1.72	0	29.46	1.07	0	87.39	237	327	521	772		1305	847			0.09	0.34	0.06	0.13	0	0.49	0.1	0		-8687.6	2190.2	202			IDDP-1 zircon1-l4	3.82	16.79	22	vendredi 7 mai 2021 06:12:24
3 / 3 .	IDDP-1 zircon1-l4	0	32.26	0.02	0.87	0.27	66.02	1.15	0.02	101.2	272	300	684	957	826	1460	806	322		0.02	0.25	0.06	0.11	0.08	0.77	0.09	0.03		-8688.1	2186.4	202			IDDP-1 zircon1-l4	7.64	25.75	23	vendredi 7 mai 2021 06:14:31
3 / 4 .	IDDP-1 zircon1-l4	0	32.34	0.05	0.83	0.12	65.64	1.24	0.06	100.35		307	671	1037	805	1466	789	289		0	0.25	0.06	0.11	0.07	0.77	0.1	0.03		-8688.7	2182.7	202			IDDP-1 zircon1-l4	11.46	25.34	24	vendredi 7 mai 2021 06:16:37
3 / 5 .	IDDP-1 zircon1-l4	0	32.46	0.03	1.01	0.27	65.7	1.1	0.07	100.99		312	699	947	784	1468	822	322		0	0.25	0.06	0.11	0.08	0.77	0.09	0.03		-8689.2	2178.9	202			IDDP-1 zircon1-l4	15.27	25.55	25	vendredi 7 mai 2021 06:18:47
3 / 6 .	IDDP-1 zircon1-l4	0	32.33	0.01	1.12	0.38	64.7	1.11	0.08	99.95		305	685	948	809	1474	796	314		0	0.25	0.06	0.12	0.08	0.76	0.09	0.03		-8689.8	2175.1	202			IDDP-1 zircon1-l4	19.09	25.24	26	vendredi 7 mai 2021 06:20:55
3 / 7 .	IDDP-1 zircon1-l4	0.61	36.6	0.04	1.12	0.52	62.02	0.95	0.08	102.3	280	307	705	919	808	1476	810	294		0.04	0.27	0.06	0.11	0.09	0.74	0.09	0.03		-8690.3	2171.3	202			IDDP-1 zircon1-l4	22.91	24.94	27	vendredi 7 mai 2021 06:23:03
3 / 8 .	IDDP-1 zircon1-l4	6.69	52.94	0.28	1.66	0.44	27.84	0.68	0.08	91.34	276	315	577	826	827	1321	795	271		0.1	0.37	0.06	0.13	0.09	0.47	0.08	0.03		-8690.9	2167.6	202			IDDP-1 zircon1-l4	26.73	16.78	28	vendredi 7 mai 2021 06:25:11
3 / 9 .	IDDP-1 zircon1-l4	10.76	77.63	0.49	2.21	0.02	0.27	0	0	92.25	284	304	567	731	756	990				0.12	0.5	0.07	0.14	0.06	0.09	0	0		-8691.4	2163.8	202			IDDP-1 zircon1-l4	30.55	10.89	29	vendredi 7 mai 2021 06:27:18
3 / 10 .	IDDP-1 zircon1-l4	10.78	77.22	0.52	2.15	0.01	0.1	0	0	91.7	264	312	437	784	732	939				0.12	0.5	0.06	0.14	0.06	0.08	0	0		-8692	2160	202			IDDP-1 zircon1-l4	34.37	10.79	30	vendredi 7 mai 2021 06:29:25
4 / 1 .	IDDP-1 zircon3-l5	17.7	72.01	1.54	0.74	0	0	0	0	92.81	277	305	529	701						0.16	0.48	0.1	0.09	0	0	0	0		-8142	1548	202			IDDP-1 zircon3-l5	0	10.74	31	vendredi 7 mai 2021 06:31:33
4 / 2 .	IDDP-1 zircon3-l5	4.05	50.42	0.18	0.69	0.07	41.19	0.71	0	97.97	278	299	628	882	788	1297	748	247		0.07	0.35	0.06	0.1	0.07	0.58	0.08	0.02		-8138.8	1543.5	202			IDDP-1 zircon3-l5	5.53	20.1	32	vendredi 7 mai 2021 06:33:42
4 / 3 .	IDDP-1 zircon3-l5	0	31.92	0.03	0.07	0.37	64.86	1.33	0.06	99.11		309	639	913	809	1458	826	329		0	0.24	0.05	0.08	0.08	0.76	0.1	0.03		-8135.6	1539	202			IDDP-1 zircon3-l5	11.06	25.31	33	vendredi 7 mai 2021 06:35:49
4 / 4 .	IDDP-1 zircon3-l5	0	31.89	0.04	0.26	0.53	64.47	1.19	0.07	98.78	273	310	646	918	808	1479	817	287		0.02	0.24	0.06	0.09	0.09	0.76	0.1	0.03		-8132.4	1534.5	202			IDDP-1 zircon3-l5	16.59	25.12	34	vendredi 7 mai 2021 06:37:57
4 / 5 .	IDDP-1 zircon3-l5	0	29.23	0.2	1.44	6.68	53.47	0.96	0	93.71		302	621	876	903	1723	826			0	0.23	0.06	0.12	0.22	0.68	0.09	0		-8129.1	1530	202			IDDP-1 zircon3-l5	22.12	24.37	35	vendredi 7 mai 2021 06:40:06
4 / 6 .	IDDP-1 zircon3-l5	0	30.43	0.37	0.38	8.67	56.6	0.84	0	100.63		309	657	924	890	1723	819			0	0.24	0.07	0.09	0.26	0.7	0.09	0		-8125.9	1525.5	202			IDDP-1 zircon3-l5	27.65	27.06	36	vendredi 7 mai 2021 06:42:15
4 / 7 .	IDDP-1 zircon3-l5	2.25	28.12	2.59	1.59	2.42	41.57	0.92	0.12	80.82	294	304	612	955	853	1710	827	420		0.06	0.22	0.13	0.13	0.14	0.59	0.09	0.04		-8122.7	1521	202			IDDP-1 zircon3-l5	33.18	19.46	37	vendredi 7 mai 2021 06:44:25
4 / 8 .	IDDP-1 zircon3-l5	0.19	30.08	0.84	0.25	1.68	59.26	0.98	0.17	94.71	283	306	660	936	845	1619	810	342		0.03	0.23	0.09	0.09	0.12	0.72	0.09	0.03		-8119.5	1516.5	202			IDDP-1 zircon3-l5	38.71	24.34	38	vendredi 7 mai 2021 06:46:32
4 / 9 .	IDDP-1 zircon3-l5	0.01	31.22	0.05	0.52	0.59	62.5	1.15	0.17	96.69	275	303	713	972	802	1497	806	287		0.02	0.24	0.06	0.1	0.09	0.75	0.09	0.03		-8116.3	1512	202			IDDP-1 zircon3-l5	44.24	24.61	39	vendredi 7 mai 2021 06:48:40
4 / 10 .	IDDP-1 zircon3-l5	0.01	31.88	0.03	0.15	0.24	65.25	1.13	0.13	99.26	283	314	706	880	792	1476	809	295		0.02	0.24	0.06	0.08	0.08	0.77	0.09	0.03		-8113.1	1507.5	202			IDDP-1 zircon3-l5	49.77	25.28	40	vendredi 7 mai 2021 06:50:46
4 / 11 .	IDDP-1 zircon3-l5	0.01	31.71	0.02	0.14	0.38	64.05	1.24	0.12	98.21	280	308	665	989	798	1497	803	295		0.02	0.24	0.06	0.09	0.08	0.76	0.1	0.03		-8109.9	1503	202			IDDP-1 zircon3-l5	55.3	25.11	41	vendredi 7 mai 2021 06:52:55
4 / 12 .	IDDP-1 zircon3-l5	0.2	32	0	0.12	0.39	63.8	1.33	0.1	98.86	290	306		939	809	1505	807	292		0.03	0.24	0	0.08	0.08	0.76	0.1	0.03		-8106.6	1498.5	202			IDDP-1 zircon3-l5	60.83	25.41	42	vendredi 7 mai 2021 06:55:02
4 / 13 .	IDDP-1 zircon3-l5	0.01	31.77	0.01	0.13	0.33	64.62	1.68	0.07	99	275	320	726	920	808	1459	803	278		0.02	0.24	0.06	0.08	0.08	0.76	0.11	0.02		-8103.4	1494	202			IDDP-1 zircon3-l5	66.36	25.36	43	vendredi 7 mai 2021 06:57:12
4 / 14 .	IDDP-1 zircon3-l5	0.03	32.05	0	0.06	0.5	63.57	2.42	0	98.95	271	321		980	784	1477	807			0.02	0.25	0	0.08	0.08	0.75	0.12	0		-8100.2	1489.5	202			IDDP-1 zircon3-l5	71.89	25.5	44	vendredi 7 mai 2021 06:59:21
4 / 15 .	IDDP-1 zircon3-l5	0.08	32.13	0.02	0.09	0.86	62.55	2.33	0.01	98.69	284	326	706	991	847	1472	823	339		0.03	0.25	0.06	0.09	0.1	0.75	0.12	0.03		-8097	1485	202			IDDP-1 zircon3-l5	77.42	25.5	45	vendredi 7 mai 2021 07:01:30
5 / 1 .	IDDP-1 zircon3-l6	9.38	72.42	0.48	1.61	0.07	6.16	0.02	0.01	91.28	266	304	605	790	646	1010	711	237		0.11	0.48	0.07	0.13	0.06	0.22	0.06	0.02		-8164	1526	202			IDDP-1 zircon3-l6	0	12.1	46	vendredi 7 mai 2021 07:03:38
5 / 2 .	IDDP-1 zircon3-l6	0	31.81	0	0.03	1.18	64.37	1.25	0.06	99.24		312	639	1009	849	1508	799	329		0	0.24	0.05	0.09	0.11	0.76	0.1	0.03		-8160.1	1527.3	202			IDDP-1 zircon3-l6	4.13	25.4	47	vendredi 7 mai 2021 07:05:45
5 / 3 .	IDDP-1 zircon3-l6	0	31.91	0.02	0.1	0.77	64.33	1.24	0.07	98.88		308	679	972	818	1497	806	314		0	0.24	0.06	0.08	0.1	0.76	0.1	0.03		-8156.1	1528.6	202			IDDP-1 zircon3-l6	8.27	25.22	48	vendredi 7 mai 2021 07:07:52
5 / 4 .	IDDP-1 zircon3-l6	0	31.86	0.01	0.13	0.51	64.66	1.25	0.06	98.94		317	661	954	838	1457	809	317		0	0.24	0.06	0.08	0.09	0.76	0.1	0.03		-8152.2	1529.9	202			IDDP-1 zircon3-l6	12.4	25.26	49	vendredi 7 mai 2021 07:09:57
5 / 5 .	IDDP-1 zircon3-l6	0	31.8	0.02	0.11	0.81	64.48	1.33	0.01	98.89		309	668	903	815	1497	798	338		0	0.24	0.06	0.08	0.1	0.76	0.1	0.03		-8148.3	1531.1	202			IDDP-1 zircon3-l6	16.53	25.25	50	vendredi 7 mai 2021 07:12:06
5 / 6 .	IDDP-1 zircon3-l6	0.01	32.14	0.02	0.19	0.18	64.84	1.29	0.05	99.13	272	314	707	865	788	1478	814	287		0.02	0.25	0.06	0.08	0.07	0.76	0.1	0.03		-8144.4	1532.4	202			IDDP-1 zircon3-l6	20.67	25.26	51	vendredi 7 mai 2021 07:14:15
5 / 7 .	IDDP-1 zircon3-l6	27.22	24.74	0.33	0.62	6.21	34.88	0.64	0	97.24	352	299	685	981	954	1735	891			0.21	0.21	0.07	0.1	0.22	0.53	0.09	0		-8140.4	1533.7	202			IDDP-1 zircon3-l6	24.8	21.14	52	vendredi 7 mai 2021 07:16:24
5 / 8 .	IDDP-1 zircon3-l6	0.14	31.26	0.01	0.15	0.46	64.37	1.3	0.08	98.19	254	308	679	891	793	1477	827	313		0.02	0.24	0.06	0.08	0.08	0.76	0.1	0.03		-8136.5	1535	202			IDDP-1 zircon3-l6	28.94	25.09	53	vendredi 7 mai 2021 07:18:32
5 / 9 .	IDDP-1 zircon3-l6	0.01	31.89	0.01	0.06	0.76	64.79	1.19	0.07	99.19	281	300	654	999	829	1499	824	317		0.02	0.24	0.05	0.09	0.1	0.76	0.1	0.03		-8132.6	1536.3	202			IDDP-1 zircon3-l6	33.07	25.32	54	vendredi 7 mai 2021 07:20:42
5 / 10 .	IDDP-1 zircon3-l6	0	31.88	0	0.19	1.43	64.26	1.1	0.01	99.65		307		871	871	1525	804	371		0	0.24	0	0.08	0.12	0.76	0.09	0.03		-8128.6	1537.6	202			IDDP-1 zircon3-l6	37.2	25.55	55	vendredi 7 mai 2021 07:22:50
5 / 11 .	IDDP-1 zircon3-l6	0	31.99	0	0.14	0.82	64.72	1.15	0.07	99.32		309		899	813	1482	808	309		0	0.24	0	0.08	0.1	0.76	0.1	0.03		-8124.7	1538.9	202			IDDP-1 zircon3-l6	41.34	25.32	56	vendredi 7 mai 2021 07:24:55
5 / 12 .	IDDP-1 zircon3-l6	0.06	32	0.01	0.13	0.57	63.79	1.29	0.11	98.65	271	314	612	914	807	1449	806	300		0.02	0.24	0.05	0.08	0.09	0.76	0.1	0.03		-8120.8	1540.1	202			IDDP-1 zircon3-l6	45.47	25.25	57	vendredi 7 mai 2021 07:27:02
5 / 13 .	IDDP-1 zircon3-l6	10.82	76.88	0.47	1.83	0.03	0.5	0	0	91.23	255	313	563	649	683	910				0.12	0.5	0.07	0.13	0.06	0.1	0	0		-8116.9	1541.4	202			IDDP-1 zircon3-l6	49.6	10.68	58	vendredi 7 mai 2021 07:29:10
5 / 14 .	IDDP-1 zircon3-l6	11.4	79.97	0.52	1.87	0.03	0.04	0	0	94.56	254	308	540	762	730	995		244		0.13	0.52	0.07	0.13	0.06	0.08	0	0.02		-8112.9	1542.7	202			IDDP-1 zircon3-l6	53.74	10.97	59	vendredi 7 mai 2021 07:31:17
5 / 15 .	IDDP-1 zircon3-l6	11.46	79.39	0.51	1.82	0.05	0.07	0	0	94.15	257	325	577	695	708	1014				0.13	0.51	0.07	0.13	0.06	0.09	0	0		-8109	1544	202			IDDP-1 zircon3-l6	57.87	10.99	60	vendredi 7 mai 2021 07:33:25
6 / 1 .	IDDP-1 zircon4-1	0.02	31.9	0.02	0.12	0.95	61.99	2.44	0.02	98.19	290	329	674	983	820	1551	821	341		0.02	0.24	0.06	0.09	0.1	0.74	0.12	0.03		-8289	1593	202			IDDP-1 zircon4-1		25.49	61	vendredi 7 mai 2021 07:35:33
7 / 1 .	IDDP-1 zircon4-2	0.94	36.94	0.03	0.26	0.59	59.84	2.02	0.02	101.11	285	324	702	926	859	1461	840	326		0.04	0.27	0.06	0.09	0.09	0.73	0.12	0.03		-8292	1583	202			IDDP-1 zircon4-2		24.92	62	vendredi 7 mai 2021 07:37:43
8 / 1 .	IDDP-1 zircon3-1	0	31.87	0.01	0.13	0.85	64.14	1.47	0.07	99.11		316	668	906	829	1523	809	283		0	0.24	0.06	0.08	0.1	0.76	0.1	0.03		-8148	1534	202			IDDP-1 zircon3-1		25.43	63	vendredi 7 mai 2021 07:39:52
9 / 1 .	IDDP-1 zircon3-2	0.09	31.34	0.08	0.25	0.6	63.23	1.29	0.04	97.79	270	304	699	887	809	1485	796	327		0.02	0.24	0.06	0.08	0.09	0.75	0.1	0.03		-8111	1493	202			IDDP-1 zircon3-2		25.16	64	vendredi 7 mai 2021 07:42:02
Viti granophyre zircons and reference zircons by EPMA (France)
		Det.Lim ppm(A)							Weight%								Peak cnt (cps)							Bg cnt (cps)							Bg1 cnt (cps)
	Comment	Ti	Hf	Ti wt% measured	Hf	O	Zr	Si	Total	Ti SP5/1	Ti SP4/1	Ti SP3/1	Hf	Ti SP5/1	Ti SP4/1	Ti SP3/1	Hf	Ti SP5/1	Ti SP4/1	Ti SP3/1	Hf	Ti SP5/1	Ti SP4/1	Ti SP3/1	Hf	X	Y	Z	Comment	Distance (µ)	Mean Z	Point#	Date
2 / 1 .	91500-1	37	275	0.0045	0.4356	35.5002	49	16	100.94	796.957	237.386	56.5105	711.165	770.726	234.415	49.3747	281.864	803.391	242.861	50.5418	305.909	738.06	225.968	48.2077	257.819	14642	-26090	162	91500-1		24.9946	2	vendredi 28 janvier 2022 11:17:20
3 / 1 .	Plesovice-1	37	277	0.0092	0.8504	35.5777	49	16	101.437	830.838	242.16	60.7455	1133.12	773.406	236.151	49.6415	289.678	807.01	235.249	49.4081	309.516	739.802	237.052	49.8749	269.84	-15543	-24698	236	Plesovice-1		25.3005	3	vendredi 28 janvier 2022 11:25:20
55 / 1 .	NI7242-Z1-1	39	286	0.0032	1.1632	35.6298	49	16	101.796	929.71	283.031	70.0829	1543.93	920.189	275.116	60.4454	337.479	953.726	277.454	60.8789	370.051	886.653	272.779	60.0119	304.906	1484	-25475	166	NI7242-Z1-1		25.5286	55	vendredi 28 janvier 2022 15:30:11
56 / 1 .	NI7242-Z1-2	38	288	0.0043	0.999	35.6011	49	16	101.604	937.223	280.56	67.0148	1408.21	914.79	272.011	61.0123	355.118	947.285	278.322	60.4787	381.48	882.295	265.699	61.5458	328.756	1509	-25495	166	NI7242-Z1-2		25.4083	56	vendredi 28 janvier 2022 15:33:49
57 / 1 .	NI7242-Z1-3	39	290	0.0037	1.1696	35.6313	49	16	101.805	945.608	282.496	67.7151	1571.51	922.236	280.226	61.6792	352.415	959.764	290.812	62.3462	394.914	884.709	269.64	61.0123	309.917	1520	-25515	166	NI7242-Z1-3		25.5335	57	vendredi 28 janvier 2022 15:37:20
58 / 1 .	NI7242-Z1-4	38	282	0.0034	1.2261	35.6412	49	16	101.871	917.067	278.656	70.283	1620.52	899.33	279.257	58.4446	335.378	925.552	280.793	58.5446	382.883	873.108	277.721	58.3446	287.873	1529	-25484	166	NI7242-Z1-4		25.5749	58	vendredi 28 janvier 2022 15:38:45
59 / 1 .	NI7242-Z1-5	39	283	0.001	0.8948	35.5802	49	16	101.476	909.287	279.892	67.1482	1260.92	911.637	277.888	58.3779	331.664	941.516	284.2	60.6788	354.214	881.758	271.577	56.077	309.115	1508	-25503	166	NI7242-Z1-5		25.3309	59	vendredi 28 janvier 2022 16:05:55
60 / 1 .	NI7242-Z10-1	39	285	0.001	0.962	35.5923	49	16	101.555	902.245	273.714	64.247	1332.03	902.55	269.239	60.0453	335.074	934.205	275.784	62.1461	367.245	870.896	262.694	57.9444	302.902	9158	-36074	166	NI7242-Z10-1		25.3802	60	vendredi 28 janvier 2022 16:21:58
61 / 1 .	NI7242-Z10-2	39	287	0.0001	0.8577	35.573	49	16	101.431	900.837	268.538	66.9481	1224.63	906.271	270.875	58.3779	337.579	929.174	272.979	60.4787	370.853	883.368	268.772	56.2771	304.305	9200	-36064	166	NI7242-Z10-2		25.3034	61	vendredi 28 janvier 2022 16:55:30
62 / 1 .	NI7242-Z10-3	39	284	0.0021	0.8137	35.5664	49	16	101.382	919.616	272.979	64.8139	1181.29	902.955	274.649	61.8793	335.073	943.059	276.519	61.5458	362.634	862.85	272.779	62.2128	307.512	9193	-36073	166	NI7242-Z10-3		25.2717	62	vendredi 28 janvier 2022 16:56:55
63 / 1 .	NI7242-Z10-4	38	286	0.0003	0.9772	35.5945	49	16	101.572	888.565	266.401	67.7485	1350.59	892.694	268.538	58.8114	338.279	932.125	275.183	61.6792	364.839	853.263	261.893	55.9437	311.72	9193	-36103	166	NI7242-Z10-4		25.3912	63	vendredi 28 janvier 2022 16:58:21
64 / 1 .	NI7242-Z10-5	38	283	0.0037	0.9002	35.583	49	16	101.487	900.77	271.443	66.4146	1261.33	877.736	270.374	59.3783	329.66	896.444	270.174	59.2783	351.006	859.028	270.575	59.4783	308.313	9206	-36107	166	NI7242-Z10-5		25.3356	64	vendredi 28 janvier 2022 16:59:46
65 / 1 .	NI7242-Z10-6	38	284	0.0023	0.8944	35.581	49	16	101.478	888.162	265.466	64.347	1265.56	879.883	260.524	58.2779	334.772	904.626	268.371	58.3446	363.636	855.14	252.677	58.2112	305.909	9215	-36119	166	NI7242-Z10-6		25.331	65	vendredi 28 janvier 2022 17:01:12
66 / 1 .	NI7242-Z7-Z8-Z9-1	38	279	0.0029	1.0733	35.6135	49	16	101.69	893.829	262.46	63.5467	1421.03	875.424	264.831	55.01	316.231	903.486	265.566	53.7429	339.58	847.363	264.097	56.2771	292.883	2828	-36741	178	NI7242-Z7-Z8-Z9-1		25.4625	66	vendredi 28 janvier 2022 17:02:39
67 / 1 .	NI7242-Z7-Z8-Z9-2	38	282	0.0031	0.9954	35.5997	49	16	101.598	881.289	261.459	63.3466	1365.12	862.384	258.921	58.478	330.363	895.17	263.763	58.1445	359.827	829.598	254.079	58.8114	300.899	2841	-36753	178	NI7242-Z7-Z8-Z9-2		25.4053	67	vendredi 28 janvier 2022 17:04:05
68 / 1 .	NI7242-Z7-Z8-Z9-3	38	281	0.0014	1.0333	35.6053	49	16	101.64	884.139	262.36	64.6471	1400.95	876.901	264.698	58.0778	327.956	913.278	264.297	56.8773	345.594	840.525	265.098	59.2783	310.317	2830	-36765	178	NI7242-Z7-Z8-Z9-3		25.4327	68	vendredi 28 janvier 2022 17:05:29
69 / 1 .	NI7242-Z7-Z8-Z9-4	37	278	0.0024	0.7906	35.5625	49	16	101.356	849.475	255.315	63.7801	1136.04	839.185	253.98	55.3101	318.438	853.33	260.424	54.3431	350.605	825.04	247.535	56.2771	286.27	2811	-36772	178	NI7242-Z7-Z8-Z9-4		25.2548	69	vendredi 28 janvier 2022 17:06:56
70 / 1 .	NI7242-Z7-Z8-Z9-5	37	282	0.0083	1.1205	35.6255	49	16	101.754	902.916	270.274	66.5146	1501.6	856.081	257.018	56.0771	332.067	884.105	262.694	56.0104	366.242	828.057	251.342	56.1437	297.892	2803	-36784	178	NI7242-Z7-Z8-Z9-5		25.4987	70	vendredi 28 janvier 2022 17:08:21
71 / 1 .	NI7242-Z4-1	38	286	0.0004	0.741	35.5522	49	16	101.293	871.868	259.255	65.4141	1094.54	872.072	261.692	59.7785	332.366	899.73	263.362	59.8785	358.624	844.413	260.023	59.6784	306.109	-5126	-37285	188	NI7242-Z4-1		25.2178	71	vendredi 28 janvier 2022 17:09:50
72 / 1 .	NI7242-Z4-2		278	0	0.6345	35.5329	49	16	101.167	873.812	268.204	61.7126	981.871	882.934	263.262	58.678	321.343	908.516	265.499	59.0782	346.997	857.352	261.025	58.2779	295.688	-5126	-37296	188	NI7242-Z4-2		25.1394	72	vendredi 28 janvier 2022 17:11:16
73 / 1 .	NI7242-Z4-3	37	278	0.0026	0.9413	35.5896	49	16	101.534	871.197	268.371	64.5471	1311.75	865.769	258.62	57.5109	325.753	891.817	259.422	57.7443	356.619	839.721	257.819	57.2775	294.887	-5126	-37305	188	NI7242-Z4-3		25.3655	73	vendredi 28 janvier 2022 17:12:41
74 / 1 .	NI7242-Z4-4	38	283	0.0026	0.8227	35.5684	49	16	101.394	888.028	263.696	64.6138	1180.38	871.504	265.098	57.6776	329.361	910.528	270.04	57.0107	361.431	832.481	260.156	58.3446	297.291	-5126	-37317	188	NI7242-Z4-4		25.2784	74	vendredi 28 janvier 2022 17:14:07
75 / 1 .	NI7242-Z4-5	37	274	0.003	0.6321	35.5345	49	16	101.17	882.563	270.007	61.9793	989.722	873.951	257.318	57.1108	322.245	909.857	261.425	58.5446	350.405	838.045	253.211	55.6769	294.085	-5124	-37327	188	NI7242-Z4-5		25.1385	75	vendredi 28 janvier 2022 17:15:34
76 / 1 .	NI7242-Z4-6	38	278	0.0013	0.6935	35.5443	49	16	101.239	875.254	264.798	63.4466	1036.73	872.407	263.896	56.1437	318.538	900.267	267.302	55.9437	348.801	844.547	260.49	56.3438	288.274	-5126	-37339	188	NI7242-Z4-6		25.1832	76	vendredi 28 janvier 2022 17:16:59
77 / 1 .	NI7242-Z4-7	36	270	0.0023	0.7538	35.5558	49	16	101.312	892.521	267.77	67.7151	1148.13	883.37	265.098	59.1449	330.265	908.516	267.102	58.9448	370.252	858.224	263.095	59.345	290.278	-5129	-37350	188	NI7242-Z4-7		25.2277	77	vendredi 28 janvier 2022 17:18:25
78 / 1 .	NI7242-Z4-8		268	0	0.6722	35.5396	49	16	101.212	872.404	257.919	61.8793	1035.33	872.844	271.076	59.2116	315.63	907.711	265.432	58.1445	340.382	837.977	276.719	60.2787	290.879	-5103	-37324	188	NI7242-Z4-8		25.1671	78	vendredi 28 janvier 2022 17:19:51
79 / 1 .	NI7242-Z4-9	37	277	0.0026	0.6688	35.5408	49	16	101.212	871.332	268.738	63.9468	1033.51	864.495	260.324	56.6773	328.157	893.292	267.102	55.7436	351.207	835.698	253.545	57.611	305.107	-5138	-37318	188	NI7242-Z4-9		25.1654	79	vendredi 28 janvier 2022 17:21:17
80 / 1 .	NI7242-Z4-10	37	275	0.0032	1.1009	35.6186	49	16	101.723	869.387	261.459	63.58	1471.31	854.204	256.417	56.3772	318.839	882.228	259.889	52.4091	353.211	826.18	252.944	60.3454	284.467	-5162	-37304	188	NI7242-Z4-10		25.4829	80	vendredi 28 janvier 2022 17:22:45
81 / 1 .	NI3702-Z11-1	38	281	0.0013	1.2407	35.6424	49	16	101.884	856.112	261.459	66.1811	1615.37	862.485	255.148	55.4101	327.256	895.304	254.881	57.1441	359.025	829.665	255.415	53.6762	295.488	-3977	28566	231	NI3702-Z11-1		25.585	81	vendredi 28 janvier 2022 17:24:21
82 / 1 .	NI3702-Z11-2	38	277	0.001	0.698	35.5449	49	16	101.244	871.902	257.051	62.3795	1044.79	867.814	258.22	57.1441	318.937	895.975	264.764	56.6106	339.38	839.653	251.675	57.6776	298.494	-3978	28547	231	NI3702-Z11-2		25.1863	82	vendredi 28 janvier 2022 17:25:46
83 / 1 .	NI3702-Z11-3	38	278	0.002	0.8513	35.5731	49	16	101.426	863.621	262.227	62.2795	1202.15	858.931	257.652	54.6765	319.739	891.951	259.823	56.4105	343.188	825.912	255.482	52.9426	296.289	-3992	28562	231	NI3702-Z11-3		25.2992	83	vendredi 28 janvier 2022 17:27:11

## Sheet: Table S3 Geochemical modeling
Geochemical modeling of the residence timescale based on Zr profiles
Data	T K	T°C	104/T	P GPa	H2O content (wt%)	Glass	SiO2	TiO2	Al2O3	Fe2O3	FeO	MnO	MgO	CaO	Na2O	K2O	M	FM	G factor	Si	Ti	Al	Fe3+	Fe2+	Mn	Mg	Ca	Na	K	NBO/ T=(Na+K+2(Ca+Mg+Mn+Fe2+)-Al-Fe3+)/(Si+Al+Ti+Fe3+).	Total mol	lnDZr (Zhang & Xu, 2016)	DZr m2/s	DZr cm2/s	logDZr	residence time (yr)
IDDP rhyolite	1073.15	800	9.31836	0.05	2	Rhy1	75	0.24	12		4		0.4	1.8	4	2.7	1.53529		9.64909	1.24825	0.00300507	0.235384	0.0050098	0.0501086	0	0.00992457	0.0320987	0.129076	0.0573279	0.0873352	1.77019	-39.2922	8.62243e-18	8.62243e-14	-13.0644	36.7759
IDDP rhyolite	1173.15	900	8.52406	0.05	2	Rhy1	75	0.24	12		4		0.4	1.8	4	2.7	1.53529		9.64909	1.24825	0.00300507	0.235384	0.0050098	0.0501086	0	0.00992457	0.0320987	0.129076	0.0573279	0.0873352	1.77019	-37.0467	8.14335e-17	8.14335e-13	-12.0892	3.89395
LA-ICP-MS analyses of the IDDP-1 glasses with errors and detection limits (SILLS)
SAMPLES: Composition Summary
File	Info	Li7	B11	Na23	Mg25	Al27	Si29	P31	K39	Ca43	Ti49	Mn55	Fe57	As75	Rb85	Sr88	Y89	Zr90	Nb93	Sb121	Cs133	Ba138	La139	Ce140	Pr141	Nd146	Sm147	Eu151	Gd157	Tb159	Dy163	Ho165	Er166	Tm169	Yb173	Lu175	Hf180	Ta181	Pb208	Th232	U238
		µg/g	µg/g	µg/g	µg/g	µg/g	µg/g	µg/g	µg/g	µg/g	µg/g	µg/g	µg/g	µg/g	µg/g	µg/g	µg/g	µg/g	µg/g	µg/g	µg/g	µg/g	µg/g	µg/g	µg/g	µg/g	µg/g	µg/g	µg/g	µg/g	µg/g	µg/g	µg/g	µg/g	µg/g	µg/g	µg/g	µg/g	µg/g	µg/g	µg/g
003_ATHO-G.FIN2	ATHO	27.9635	6.10048	31860.2	557.342	63507.3	353749	96.7841	33315.8	12198.3	1533.65	817.883	27269.8	1.5152	62.1396	89.3619	89.5133	483.178	56.3826	0.299232	0.928599	534.753	52.3055	115.878	14.0441	59.1484	14.1325	2.55843	14.0443	2.36755	15.6443	3.32578	10.04	1.41269	9.71609	1.45595	13.1203	3.57054	6.02099	7.39873	2.23226
004_ATHO-G.FIN2	ATHO	26.7639	5.88009	30766.1	555.997	63507.3	351297	92.0865	34546.9	12024	1554.8	820.26	27977	2.07189	62.1933	90.7612	88.6732	481.538	56.6163	0.172866	0.923599	546.537	54.334	118.785	13.9362	57.3734	14.0993	2.7196	12.8763	2.39909	15.4097	3.20376	9.79317	1.3877	9.89525	1.45004	13.1357	3.35992	5.83152	7.12594	2.15103
005_NIST610.FIN2	NIST610	474.582	365.551	104286	508.027	10584.5	345486	290.116	775.533	91501.1	544.347	489.572	552.147	385.368	462.405	579.712	522.227	490.531	522.167	458.193	416.528	497.229	495.703	496.697	493.797	467.271	505.264	498.092	474.401	494.961	463.64	490.036	476.353	468.912	496.836	481.328	453.25	488.798	484.433	501.311	507.299
006_NIST610.FIN2	NIST610	466.966	366.152	101367	494.941	10584.5	341837	284.019	674.201	86089.6	509.655	471.372	555.038	357.434	419.312	527.906	476.131	456.512	484.976	444.006	391.521	462.972	463.23	457.51	458.759	441.76	462.081	468.391	458.354	481.901	464.381	489.943	477.122	461.496	493.434	478.092	449.904	481.321	470.368	506.668	487.97
007_IDDP-1_001.FIN2	IDDP	23.562	3.54963	25751.5	1247.98	59802.7	312781	129.723	31521.3	10396.9	2047.12	487.714	22336.5	<1.7271	68.9337	57.1035	61.2738	399.299	32.2172	<0.29498	0.895747	491.461	37.9862	77.6365	9.53075	37.9888	8.40891	1.45961	8.87916	1.53629	9.81073	2.18278	6.57675	1.00126	6.93872	1.05987	10.4915	2.21618	5.37326	7.27253	2.10304
008_IDDP-1_002.FIN2	IDDP	24.8009	<2.5768	26271.9	1190.09	59802.7	322735	156.722	33516.9	10187.1	2098.05	489.858	22426.9	2.39974	71.2094	57.0617	63.8907	410.243	33.6067	0.322994	0.780318	500.51	38.8106	80.7943	9.47769	37.3856	8.5361	1.41882	8.76758	1.53546	10.6043	2.10308	6.5502	0.944434	7.16132	0.927272	10.5878	2.16039	5.26387	7.30191	2.10688
009_IDDP-1_003.FIN2	IDDP	24.0276	4.5555	26334.7	1273.7	59802.7	305591	141.644	29385.2	10238.9	2054.84	497.454	23147.4	1.98403	71.1636	58.5918	61.9185	412.581	32.8529	0.313475	0.821506	500.095	38.2451	78.791	9.26996	36.9492	8.83425	1.60879	8.8589	1.57913	10.2457	2.17888	6.7125	0.979888	7.17235	1.14486	10.7762	2.28981	5.31687	7.50804	2.1642
010_IDDP-1_004.FIN2	IDDP	28.5188	3.3431	26661.6	1188.98	59802.7	320121	172.42	34951.2	10318.1	2167.09	507.813	23097.9	2.00554	72.1256	56.2314	60.4319	405.634	33.0727	0.306281	0.790096	487.611	37.8572	79.7865	9.39057	38.1298	8.57131	1.4749	9.04672	1.49649	10.1982	2.15971	6.50454	0.964123	7.04109	1.08386	10.2725	2.13899	5.21831	7.2377	2.16355
011_IDDP-1_005.FIN2	IDDP	28.2813	4.75011	26986	1199.09	59802.7	318537	159.81	32803.1	10216.4	2145.52	507.114	23429.6	1.29201	75.3857	58.7174	62.8475	415.154	33.0987	<0.1656	0.811542	482.109	37.3223	79.4576	9.2262	38.3111	8.66992	1.41514	8.98817	1.59138	9.95662	2.23837	6.45722	0.925405	7.09917	1.00685	10.5598	2.39103	5.64206	7.44013	2.19789
012_IDDP-1_006.FIN2	IDDP	29.8395	4.66049	26486	1215.52	59802.7	321547	168.033	31638.4	10135.3	2031.72	491.079	22978.9	2.53361	76.2555	58.9964	62.1847	408.9	33.474	0.501236	0.857644	500.645	38.8016	81.8384	9.32485	37.066	9.15355	1.5509	9.16089	1.49997	10.0887	2.18716	6.42598	0.962047	7.03362	1.05827	10.2807	2.39705	5.56387	7.46486	2.19371
013_IDDP-1_007.FIN2	IDDP	27.8515	3.67995	26542.9	1250.42	59802.7	321597	177.326	31818.2	10089.6	2139.2	508.534	23917.7	2.43152	76.7401	58.7778	62.5521	410.387	33.4171	0.364648	0.909764	496.292	38.5212	80.8694	9.43777	37.2637	8.97475	1.48873	9.15672	1.57893	10.243	2.24219	6.56924	0.987741	7.33519	1.07971	10.3371	2.36832	5.16316	7.66916	2.25127
014_IDDP-1_008.FIN2	IDDP	27.6391	5.16516	26599.1	1240.96	59802.7	325143	153.891	31707.1	10458.9	2098.68	498.822	24219.7	1.88195	77.2436	56.4504	60.3212	389.968	32.3758	0.37076	0.840992	472.531	36.0248	76.5195	8.82061	34.5727	8.29457	1.45872	8.52576	1.58074	9.55006	2.15598	6.46016	0.938044	6.77429	1.07655	10.558	2.27	5.32749	7.23222	2.1947
015_IDDP-1_009.FIN2	IDDP	27.6503	4.25498	26756	1240.33	59802.7	331108	165.935	31944.7	10057.2	2151.99	516.401	23197.4	1.44357	72.1685	57.1186	60.808	402.259	32.7242	0.301565	0.879102	501.504	38.7232	81.4421	9.47082	38.5795	8.93723	1.51844	9.42096	1.56377	10.5846	2.18023	6.9311	1.00275	6.83541	1.02886	10.3616	2.26037	5.35888	7.5343	2.40816
016_IDDP-1_010.FIN2	IDDP	27.9301	3.74709	26014.8	1248.53	59802.7	323669	161.764	32312.3	10641.5	2104.36	513.217	23826.1	1.9659	72.3846	57.4798	61.0632	394.525	32.0727	0.266382	0.83664	474.453	36.9016	75.9556	9.02291	36.2377	8.17633	1.42366	8.6031	1.5686	10.1557	2.09229	6.60657	0.921092	7.44903	1.05116	10.5983	2.28949	5.11148	7.37843	2.10669
017_IDDP-1_011.FIN2	IDDP	28.4706	4.41589	26596.2	1262.58	59802.7	326474	170.183	30958	10748.3	2156.52	513.68	24004.1	1.67718	73.493	60.9966	63.1932	407.749	33.1754	0.305618	0.850421	492.258	38.5452	78.3869	9.41178	36.9084	8.77581	1.50777	9.1405	1.58546	10.3763	2.11823	6.76513	1.05249	7.63986	1.10173	11.1601	2.36883	5.48802	7.56658	2.20046
018_IDDP-1_012.FIN2	IDDP	27.3342	3.61961	26797.4	1195.75	59802.7	327875	172.948	30793.3	10215	2105.5	500.173	23627.3	1.76634	75.6209	58.8425	63.449	412.924	33.236	0.394234	0.852764	502.963	38.7877	81.4108	9.40558	36.8517	9.15021	1.53385	9.28207	1.54725	10.2707	2.28889	6.84516	1.04082	7.39622	1.14139	11.0361	2.30271	5.80434	7.4885	2.30758
019_IDDP-1_013.FIN2	IDDP	28.0243	5.37198	26919.9	1243.38	59802.7	320262	168.746	30758.1	10375.8	2081.22	491.632	22361.8	2.38516	71.0851	57.9864	61.4175	399.277	32.4238	0.316732	0.903769	493.221	38.7328	80.1597	9.30668	37.6797	8.53329	1.46408	8.72492	1.61288	10.0511	2.16084	6.84157	1.01732	6.6714	1.08006	9.93835	2.17699	5.04055	7.09908	2.1372
020_IDDP-1_014.FIN2	IDDP	28.6621	4.07281	26672.7	1218.01	59802.7	322380	174.187	30366.2	10245.3	2147.94	506.758	23170.3	<1.2184	72.06	56.5727	60.9797	394.061	32.4143	0.454696	0.840009	500.066	38.8268	79.9944	9.59613	37.9101	9.14703	1.51987	9.57148	1.54284	10.5315	2.17145	6.79629	1.02318	6.79204	1.14714	11.1115	2.30844	5.63297	7.45573	2.2079
021_IDDP-1_015.FIN2	IDDP	26.3758	3.76452	25830.3	1224.16	59802.7	309876	154.144	28734.5	10231.8	2076.26	486.809	22841	1.82404	73.3542	60.3934	65.3325	417.658	34.2179	0.414809	0.834274	505.177	39.4979	80.6281	9.33212	37.3374	8.59919	1.59379	9.55049	1.5965	10.382	2.23337	6.98461	1.04268	7.11323	1.0886	10.3359	2.29828	5.49288	7.16808	2.07413
024_ATHO-G.FIN2	ATHO	29.6208	6.48439	31256	548.008	63507.3	344862	85.0308	28612.5	12160.1	1566.57	813.098	27858.2	1.96874	59.8904	89.5675	86.1218	480.682	56.0566	0.280103	0.83909	542.927	52.6873	117.304	14.2701	59.0366	13.8969	2.68605	13.6897	2.44668	16.1626	3.19881	9.63659	1.47077	10.0705	1.42814	13.1028	3.60163	5.6341	7.09952	2.24137
025_ATHO-G.FIN2	ATHO	31.5401	5.24751	30457.6	539.753	63507.3	345825	110.874	28299.3	11786.5	1559.16	793.8	27481.2	2.27272	60.9429	90.4078	88.8327	479.373	56.9972	0.286399	0.921943	542.644	52.6638	118.891	14.3508	57.9031	14.0291	2.79521	14.6073	2.48547	15.5602	3.27514	9.64579	1.37075	9.92925	1.49533	13.4009	3.54555	6.10806	7.05991	2.22735
026_NIST610.FIN2	NIST610	521.266	386.127	102938	505.666	10584.5	352977	338.962	612.803	89386	531.46	490.937	544.628	376.231	439.175	549.756	488.085	468.434	500.353	447.875	404.071	489.296	474.666	490.396	480.911	461.59	482.13	478.072	471.291	482.165	464.999	496.725	485.417	469.147	495.505	487.107	457.724	495.154	466.193	495.101	488.206
027_NIST610.FIN2	NIST610	505.955	360.853	101450	489.096	10584.5	335909	329.228	607.696	87063.2	513.951	470.768	555.983	363.258	447.864	551.866	495.108	475.459	501.298	423.195	389.849	478.746	465.933	485.836	489.284	469.717	489.992	484.744	465.432	471.747	453.608	514.478	499.941	493.05	512.969	483.254	464.539	500.809	475.286	521.42	514.129
028_IDDP-1_016.FIN2	IDDP	28.9702	4.312	27164.7	1241.94	59802.7	317319	166.622	29067	10093.2	2092.07	498.538	23409.5	1.43785	70.2159	58.9384	62.1755	401.225	31.2763	0.270815	0.825553	486.74	37.5271	79.7269	9.17299	36.423	8.4698	1.51076	8.91377	1.5523	10.0314	2.15368	6.61471	1.0042	6.60332	0.990375	10.1171	2.14341	5.54108	7.14286	2.17685
029_IDDP-1_017.FIN2	IDDP	26.7297	5.03212	25748.8	1208.75	59802.7	316591	164.348	27850.5	10102.4	2154.8	509.601	24349.1	1.25017	77.1583	60.7764	63.4904	417.773	33.604	0.384734	0.814363	498.011	38.6675	79.8254	9.29374	37.4608	8.85526	1.46487	9.02943	1.52311	10.2105	2.16933	7.09831	0.996769	7.45948	1.07964	10.5003	2.28095	5.23144	7.36455	2.11338
030_IDDP-1_018.FIN2	IDDP	25.6188	3.88441	26397.6	1253.85	59802.7	321241	164.529	26987.1	10465.4	2070.7	493.579	23852.8	2.07059	72.6379	60.4649	61.9763	405.204	32.393	0.296087	0.806401	494.565	39.0366	81.2042	9.53328	38.8522	9.1093	1.47983	9.23596	1.636	10.4373	2.28379	6.86964	0.991832	7.29577	1.11894	11.2986	2.36643	5.46833	7.44003	2.16419
031_IDDP-1_019.FIN2	IDDP	27.9743	4.31112	25114.6	1256.6	59802.7	325298	170.421	26988.9	10530.4	2107.62	488.657	23056.3	2.39688	71.9393	60.4076	62.5031	412.066	33.1673	0.28133	0.843402	496.579	38.6627	80.8888	9.32754	37.4482	8.91687	1.51171	9.23291	1.54632	10.4694	2.19937	6.54292	0.960132	7.00704	1.09846	10.6619	2.26723	5.43801	7.44102	2.20242
032_IDDP-1_020.FIN2	IDDP	23.0102	<15.25	25703.1	1261	59802.7	300190	230.016	26114.3	10086	2095.99	472.809	23032.7	<10.8705	79.6286	61.2293	65.5551	429.814	33.6196	<1.6643	<0.6856	499.021	41.6062	85.7308	9.829	34.2234	9.83642	1.395	10.5682	1.45359	11.1004	2.43847	7.43747	1.42717	7.90063	1.07512	10.7362	2.52725	5.45317	7.38	1.85973
033_IDDP-1_021.FIN2	IDDP	27.7279	4.28164	26545.3	1261.6	59802.7	310636	162.027	25734.8	10184.5	2089.41	485.153	23282.4	1.70574	71.1746	59.8004	62.9877	420.488	33.4387	0.313835	0.935715	496.562	39.0036	81.728	9.50879	37.6953	9.27623	1.55466	9.13447	1.65176	10.2678	2.21316	6.7877	0.984626	7.31486	1.0833	10.7865	2.27481	5.44493	7.39663	2.31404
034_IDDP-1_022.FIN2	IDDP	26.8592	3.19617	25211.2	1237.64	59802.7	314629	171.271	26299	10533.3	2177.95	511.813	24472.7	2.08734	70.324	58.1145	60.6367	402.238	31.8912	0.365229	0.809877	490.586	38.9119	80.9379	9.56	38.5513	8.89224	1.44414	8.94949	1.49357	10.5252	2.21135	6.54513	0.990782	6.95974	0.98075	10.5686	2.20136	5.36821	6.78049	2.09704
035_IDDP-1_023.FIN2	IDDP	25.8894	4.03356	25164.2	1218.73	59802.7	314439	171.253	25585.5	10272.1	2059.9	480.882	23332.9	<1.091	73.8505	58.0824	62.3878	401.263	31.417	0.323891	0.804184	489.109	38.0974	80.3597	9.25269	37.5415	8.58283	1.4234	8.9282	1.47651	10.3999	2.35844	6.60338	1.00837	6.97751	1.06489	10.6547	2.2571	5.46602	7.2995	2.13397
036_IDDP-1_024.FIN2	IDDP	25.2159	4.3751	25487.8	1235.98	59802.7	318330	155.457	26110.4	10122.9	2074.91	491.725	23638.7	2.58036	72.1205	58.9117	61.3694	398.866	31.8974	0.24406	0.722334	491.89	38.5864	79.5071	9.65586	37.7088	8.62654	1.4716	9.08674	1.59778	10.3791	2.32617	6.49001	0.985851	6.91912	1.0151	10.7659	2.22743	5.27479	7.29155	2.1995
037_IDDP-1_025.FIN2	IDDP	26.1882	3.77715	27045	1130.25	59802.7	321547	162.157	26916.9	9690.21	2107.31	482.704	22881	2.04581	73.8997	57.5441	62.5855	409.482	31.9776	<0.14401	0.915853	484.96	38.4333	80.0537	9.34371	37.4945	8.49418	1.37245	8.95199	1.54911	10.9524	2.20584	6.91142	1.00172	7.14319	1.04756	11.2173	2.34466	5.30379	7.33811	1.98714
038_IDDP-1_026.FIN2	IDDP	25.6933	3.75607	25999	1262.67	59802.7	313488	167.7	25258	10042.3	2127.16	498.428	23215.1	2.5123	72.9439	59.6199	62.7378	407.384	33.3116	0.326734	0.869699	496.299	38.7269	81.9063	9.45934	38.4883	8.91963	1.45763	9.16728	1.54053	10.4334	2.1924	6.87931	0.972583	7.04465	0.970844	10.5654	2.35495	5.13803	7.25341	2.02531
039_IDDP-1_027.FIN2	IDDP	27.5919	3.02078	26658.1	1090.22	59802.7	325161	160.337	25694.4	9569.23	2100.38	464.688	22385.1	2.2136	70.9731	56.6396	62.9713	415.942	32.8683	0.297397	0.913638	499.94	38.907	82.9949	9.31926	38.5478	8.73017	1.55703	10.0029	1.60122	10.5869	2.28222	7.08224	1.06457	7.50556	1.11938	10.8592	2.42573	5.52179	7.29356	2.19874
040_IDDP-1_028.FIN2	IDDP	26.8118	5.36371	26310.7	1060.52	59802.7	316839	175.309	24972.6	9516.58	2124.56	476.263	23175.8	1.46466	74.1304	56.4807	62.611	408.432	33.4261	0.29881	0.732529	506.67	39.1544	82.916	9.5267	38.3795	8.73676	1.5324	9.55684	1.63542	10.9391	2.3207	6.78783	1.02262	7.39542	1.10347	10.8585	2.48024	5.30765	7.71841	2.21708
041_IDDP-1_029.FIN2	IDDP	26.8634	3.35939	26047.1	1259.42	59802.7	333010	153.014	25753.2	10334.1	2130.1	519.739	24284.4	1.61973	73.306	59.6301	61.3485	401.451	33.2592	0.296847	0.849057	507.01	39.2757	81.7504	9.40795	39.3109	9.11919	1.60778	9.20046	1.56787	10.8378	2.39069	6.56983	1.09329	7.71458	1.07958	11.1114	2.51864	5.68812	7.77606	2.3807
042_IDDP-1_030.FIN2	IDDP	27.0307	3.71101	26838.2	1252.75	59802.7	311682	150.239	24973.8	10717.4	2197.56	523.424	25370.1	1.60316	75.9294	61.6618	62.9816	413.37	33.8184	0.228333	0.787639	507.247	39.8984	85.5258	9.89824	39.7989	8.93519	1.48785	9.79233	1.66063	10.7989	2.35349	7.15347	1.07667	7.5097	1.07215	11.3818	2.30851	5.30715	7.6912	2.24943
SAMPLES: Error Summary (1 sigma)
File	Info	Li7	B11	Na23	Mg25	Al27	Si29	P31	K39	Ca43	Ti49	Mn55	Fe57	As75	Rb85	Sr88	Y89	Zr90	Nb93	Sb121	Cs133	Ba138	La139	Ce140	Pr141	Nd146	Sm147	Eu151	Gd157	Tb159	Dy163	Ho165	Er166	Tm169	Yb173	Lu175	Hf180	Ta181	Pb208	Th232	U238
		µg/g	µg/g	µg/g	µg/g	µg/g	µg/g	µg/g	µg/g	µg/g	µg/g	µg/g	µg/g	µg/g	µg/g	µg/g	µg/g	µg/g	µg/g	µg/g	µg/g	µg/g	µg/g	µg/g	µg/g	µg/g	µg/g	µg/g	µg/g	µg/g	µg/g	µg/g	µg/g	µg/g	µg/g	µg/g	µg/g	µg/g	µg/g	µg/g	µg/g
003_ATHO-G.FIN2	ATHO	3.55777	1.03329	3409.21	57.8885	6167.31	35986.5	13.3472	3511.01	1352.97	165	87.0833	2816.43	0.703614	6.61314	8.97263	9.04786	47.0665	5.85507	0.152152	0.120731	56.3623	5.4921	12.3593	1.51775	6.14336	1.64587	0.270822	1.47442	0.243235	1.65226	0.380245	1.09397	0.148489	1.07963	0.163366	1.34921	0.37588	0.712624	0.817592	0.264838
004_ATHO-G.FIN2	ATHO	2.98673	1.1148	3139.32	57.3746	6317.52	35633.8	13.839	3417.05	1292.33	157.312	83.8729	3021.27	0.679546	6.4643	9.22507	9.08647	46.5854	5.62492	0.0898921	0.126181	56.1897	5.30042	12.1839	1.43467	5.59176	1.36093	0.271424	1.28998	0.262429	1.52401	0.327313	0.952261	0.149808	1.05824	0.161102	1.31078	0.342465	0.62707	0.747584	0.210042
005_NIST610.FIN2	NIST610	26.9212	22.8911	5906.15	27.1684	549.972	17987	21.748	64.6922	5434.59	32.9153	27.0591	41.6273	20.1093	27.4637	35.3173	31.6359	29.7091	31.7912	25.7133	24.9658	30.1429	32.3881	30.9831	29.8917	27.6905	31.3482	30.1963	28.2244	32.6071	28.095	31.3542	28.0764	27.1281	29	30.8324	26.2914	26.566	27.887	29.4871	30.9006
006_NIST610.FIN2	NIST610	45.5185	28.5064	8595.71	44.0398	949.636	33137.2	30.0602	67.135	8067.04	44.2954	45.1286	55.7937	26.7517	34.1887	44.121	38.5666	37.8612	42.6326	40.0543	37.0608	39.855	39.7968	42.6074	38.2882	36.7717	39.7815	41.6557	40.5141	44.523	41.2378	45.4618	41.7453	39.5919	41.9532	39.7902	37.3347	39.5396	43.0673	45.2363	45.3341
007_IDDP-1_001.FIN2	IDDP	4.96936	1.5662	4282.74	208.916	9962.24	53837.5	33.5061	5373.82	1669.04	341.132	83.7366	3718.63	<1.7271	11.0952	9.44985	9.9469	64.1657	5.46714	<0.29498	0.137905	84.4713	6.30346	13.0893	1.59352	6.68364	1.49115	0.274259	1.4722	0.257235	1.60653	0.400917	1.11252	0.191477	1.20571	0.185505	1.81366	0.350244	0.939641	1.27882	0.388728
008_IDDP-1_002.FIN2	IDDP	4.87449	<2.5768	4648.73	211.722	10511.4	59881.5	37.3233	6279.5	1865.97	379.521	88.9341	4103.23	1.39293	12.6083	10.234	11.3529	73.8787	5.99424	0.161779	0.181176	93.6577	7.21742	15.3359	1.79308	7.03977	1.6359	0.258623	1.59387	0.274826	2.00188	0.386995	1.14494	0.169431	1.2889	0.190455	2.03705	0.413443	0.920573	1.44711	0.403456
009_IDDP-1_003.FIN2	IDDP	3.24591	1.04203	3187.84	155.323	7164.45	35832.7	20.4434	3323.04	1207.68	241.025	61.2474	2853.85	0.716892	8.94428	7.2797	7.62868	51.8114	4.17274	0.112626	0.125299	62.3337	4.60936	9.56611	1.11881	4.33477	0.997026	0.207878	1.01422	0.189092	1.2426	0.257194	0.87218	0.124567	0.862502	0.133963	1.35061	0.270449	0.710914	0.937366	0.286483
010_IDDP-1_004.FIN2	IDDP	4.44911	1.1498	3464.89	155.482	7562.22	40406.4	28.3681	4637.4	1312.53	277.152	68.0582	3096.32	0.588052	9.52567	6.84284	7.33521	52.4744	4.25523	0.137917	0.11321	60.659	4.66874	10.2115	1.18677	5.27609	1.21074	0.219987	1.21021	0.192104	1.36072	0.286372	0.896281	0.130278	0.895328	0.147903	1.26775	0.277071	0.707071	0.980839	0.311096
011_IDDP-1_005.FIN2	IDDP	4.22716	1.04831	3610.96	157.607	7343.33	38803	22.209	3903.85	1356.68	282.498	69.0985	3103.28	0.843191	9.41136	7.10815	7.63278	50.9901	3.97461	<0.1656	0.121915	56.014	4.23208	9.28033	1.16868	4.92354	1.15516	0.191481	1.14922	0.184395	1.17624	0.283042	0.764301	0.128207	0.94324	0.151707	1.45811	0.314878	0.82263	0.981496	0.292439
012_IDDP-1_006.FIN2	IDDP	4.05152	1.21753	3441.26	158.207	7611.72	40820.8	22.8071	3918.64	1349.43	252.138	62.7842	3081.81	0.790748	9.757	7.68229	8.06562	51.3702	4.31349	0.124146	0.142535	63.4589	4.96241	10.7782	1.20559	4.93213	1.2122	0.252166	1.23059	0.19247	1.28647	0.291459	0.852918	0.140225	1.06493	0.162906	1.41963	0.338643	0.810617	1.03376	0.30683
013_IDDP-1_007.FIN2	IDDP	4.58904	1.09437	3330.47	164.025	7520.26	41305.4	24.9741	4058.5	1434.24	288.381	70.7291	3371.81	0.653542	11.3128	8.22022	8.51791	55.5622	4.64436	0.116613	0.132508	68.0508	5.18639	10.8145	1.31494	5.15974	1.19451	0.215537	1.25236	0.232155	1.40679	0.290705	0.889945	0.149499	0.957111	0.157026	1.45952	0.328609	0.735121	1.08995	0.345744
014_IDDP-1_008.FIN2	IDDP	3.81293	1.16102	3540.81	159.845	7860.16	44250.9	24.7481	4267.45	1313.99	271.811	65.3513	3445.7	0.879451	11.0457	7.30395	7.69914	49.1908	4.13832	0.11573	0.123291	61.3063	4.51894	9.81849	1.07284	4.23781	1.06727	0.195311	1.10943	0.202677	1.41665	0.279196	0.888054	0.120271	0.87592	0.14827	1.40347	0.294013	0.66334	0.934821	0.281371
015_IDDP-1_009.FIN2	IDDP	4.09811	1.15318	3316.38	150.503	7142.38	41271.9	23.6739	3989.14	1216.33	260.333	63.9969	2890.91	0.681997	9.08931	6.94334	7.49671	49.9736	4.01826	0.0874775	0.145268	64.8655	4.84524	10.2823	1.21447	4.63045	1.24003	0.209573	1.21378	0.207341	1.34852	0.271837	0.900883	0.133539	0.92018	0.127919	1.41373	0.324302	0.783995	0.979132	0.350364
016_IDDP-1_010.FIN2	IDDP	4.24481	1.1003	3499.56	164.234	7848.67	43369.7	24.3324	4621.32	1475.5	280.686	70.8057	3226.3	0.905837	9.79862	7.33245	7.58944	50.3438	4.28041	0.101204	0.109568	61.2591	4.57435	9.54668	1.14964	4.54445	1.07863	0.20608	1.28065	0.237324	1.29211	0.274419	0.837863	0.11651	1.01678	0.131154	1.34954	0.336471	0.691765	1.00312	0.297326
017_IDDP-1_011.FIN2	IDDP	4.15565	0.830466	3412.71	155.729	7335.52	42982.6	24.8938	4149.58	1440.6	283.604	65.9912	3212.49	0.603098	10.0746	8.10286	8.22293	52.9974	4.40895	0.0950307	0.1319	66.3704	4.88206	10.106	1.23121	4.85342	1.24103	0.188999	1.2974	0.199862	1.32537	0.278346	0.838497	0.137473	1.09503	0.135972	1.4535	0.326033	0.721052	1.01345	0.310866
018_IDDP-1_012.FIN2	IDDP	4.39384	1.19612	3740.51	156.76	7742.7	44996.7	27.0008	4085.74	1408.18	282.621	69.5173	3328.19	0.708158	11.1937	8.16219	8.45008	55.4465	4.53546	0.137285	0.139686	67.3697	4.91161	10.554	1.24698	4.81697	1.12036	0.240758	1.37561	0.220372	1.3454	0.302165	0.917479	0.140036	0.951455	0.157192	1.41408	0.315854	0.821135	1.01183	0.351717
019_IDDP-1_013.FIN2	IDDP	4.08607	1.75011	3543.88	157.877	7377.97	43281.3	26.6529	4117.1	1342.79	254.475	63.8715	2834.71	0.765216	8.80006	7.00978	7.45136	48.8852	4.06618	0.138058	0.125764	63.4864	4.67593	9.90645	1.14407	4.55369	1.03934	0.203663	1.11152	0.202608	1.26603	0.251701	0.869187	0.129043	0.886059	0.134536	1.18881	0.270101	0.620372	0.88214	0.272791
020_IDDP-1_014.FIN2	IDDP	4.48382	1.22186	3353.31	155.446	7211.22	41732.1	26.267	4217.14	1286.18	286.343	66.8382	3014.36	<1.2184	9.17031	6.66839	6.71893	45.3815	3.89468	0.124483	0.137686	63.9326	4.72771	10.0599	1.16019	4.61591	1.29129	0.22973	1.27269	0.185973	1.43054	0.294542	0.819463	0.132382	0.978351	0.164614	1.40335	0.324735	0.743514	0.902656	0.314167
021_IDDP-1_015.FIN2	IDDP	2.75698	1.22474	2210.49	117.243	5190.97	31593.2	26.7339	3354.75	1151.74	209.572	48.086	2089.2	0.892397	8.23719	6.36762	7.10406	39.8979	3.36913	0.161949	0.105702	52.7515	3.72796	8.07967	0.828004	3.19657	0.837468	0.0923469	0.881869	0.225657	0.820226	0.165731	0.651271	0.11	0.628317	0.0961013	1.13088	0.275677	0.847673	0.560985	0.225368
024_ATHO-G.FIN2	ATHO	3.69276	1.30858	3395.76	57.5011	6634.88	38565.2	14.6764	3060.58	1328.66	163.443	90.1821	3192.32	0.896749	6.62854	10.0259	8.99456	51.7997	6.41732	0.10093	0.118242	58.767	5.74429	13.0748	1.6146	6.47625	1.53585	0.302168	1.65213	0.269395	1.72449	0.342268	1.0655	0.150369	1.06523	0.154525	1.40168	0.364671	0.650696	0.772356	0.244467
025_ATHO-G.FIN2	ATHO	3.40648	1.23335	2830.59	51.6082	5864.88	31368.6	14.8349	2561.07	1072.7	144.003	77.7926	2704.06	0.549765	6.09755	8.93757	8.60001	46.3024	5.42805	0.108098	0.126517	53.3779	4.9674	11.2234	1.34183	5.80867	1.36454	0.306497	1.69957	0.23548	1.48189	0.300578	0.909106	0.147813	0.897256	0.136429	1.34046	0.338471	0.651128	0.728788	0.234604
026_NIST610.FIN2	NIST610	33.2937	21.2114	6547.38	31.6486	658.108	22643.2	24.1896	43.1241	6373.18	37.1372	30.1158	40.0965	19.4433	27.2813	32.8582	29.6389	28.1055	28.7118	24.6253	23.5403	32.9605	29.8411	29.7552	30.4582	28.0083	29.8472	28.7103	29.7169	31.0165	29.7922	31.9954	30.8554	30.23	28.7182	29.4487	29.0556	31.3971	29.4643	32.3711	29.655
027_NIST610.FIN2	NIST610	20.5583	23.8168	4921.1	19.3504	340.365	16980.8	24.161	28.357	3401.28	15.6025	15.5027	39.8446	12.7828	22.27	18.5567	18.91	18.9325	19.4422	22.7368	16.8632	16.9527	18.1127	20.2741	23.1114	26.9608	23.7654	25.2619	24.9194	24.793	20.2988	20.8706	21.5851	15.5698	19.9325	15.2254	14.8056	25.0049	25.3504	24.8373	28.341
028_IDDP-1_016.FIN2	IDDP	4.23509	0.901405	3703.66	159.351	7296.72	41586.2	24.4109	4143.17	1363.64	270.34	66.7063	3034.19	0.859361	9.63256	7.79339	8.16659	52.3662	4.19676	0.133683	0.139446	64.4312	4.85273	10.3025	1.23334	4.84397	1.19203	0.217134	1.16194	0.204297	1.32373	0.286117	0.859129	0.134667	0.859124	0.135864	1.24256	0.259863	0.726006	0.914802	0.285013
029_IDDP-1_017.FIN2	IDDP	4.06863	1.07788	3320.58	146.952	7528.14	42190.2	24.3489	3677.02	1426.26	287.408	69.4383	3490.72	0.748143	10.9157	7.99815	7.94786	52.7172	4.62897	0.145544	0.136737	65.504	4.9655	10.2997	1.15712	4.73867	1.1903	0.187528	1.07821	0.186723	1.27393	0.274361	0.924574	0.130239	1.04652	0.161233	1.30908	0.286243	0.69258	0.934381	0.308386
030_IDDP-1_018.FIN2	IDDP	3.15668	1.22999	2717.06	133.187	6344.93	35316.9	20.8691	2931.74	1092.72	216.674	53.7766	2423.04	0.764975	8.13821	6.24301	6.4063	42.1854	3.42379	0.130289	0.116041	52.1303	4.01654	8.63744	0.991323	4.2371	1.04301	0.169379	0.935143	0.172729	1.01397	0.27315	0.726663	0.112914	0.895748	0.123664	1.1105	0.275593	0.743885	0.880683	0.253119
031_IDDP-1_019.FIN2	IDDP	3.46141	0.938127	2997.14	146.722	7030.15	40369.7	20.8276	3410.41	1324.5	252.374	60.5859	2807.9	0.545656	9.03119	7.41608	7.36875	49.6363	4.04458	0.101644	0.128724	59.8101	4.45591	9.60284	1.09642	4.47458	1.02611	0.176247	1.15521	0.191863	1.33983	0.285155	0.784813	0.10392	0.937441	0.125612	1.32939	0.274988	0.682525	0.880611	0.28672
032_IDDP-1_020.FIN2	IDDP	8.29281	<15.25	4113.94	189.601	8403.45	46441.5	108.544	4127.97	2335.52	315.989	70.3535	3409.37	<10.8705	12.736	7.82414	8.17732	58.1945	4.99107	<1.6643	<0.6856	69.3055	5.28067	10.7143	1.56247	4.43206	1.7433	0.304749	1.49359	0.263768	1.19028	0.398763	1.44122	0.173226	1.27714	0.206025	1.48628	0.320384	1.02425	1.0935	0.302497
033_IDDP-1_021.FIN2	IDDP	3.85099	0.938726	3305.03	152.798	7217.68	37962.5	22.1736	3225.99	1255.46	256.672	62.0123	2910.36	0.672758	9.80165	7.76078	8.02832	54.0491	4.3111	0.114883	0.142342	65.3124	5.03094	10.8327	1.26004	4.9963	1.12278	0.196312	1.16503	0.221337	1.21758	0.261554	0.792108	0.111264	0.951884	0.139545	1.31623	0.296841	0.765689	0.887588	0.330267
034_IDDP-1_022.FIN2	IDDP	3.92356	1.18016	3191.94	150.336	7080.74	39272.9	22.0225	3392.67	1457.71	282.836	69.2705	3328.57	0.68343	9.24561	7.21262	7.53412	51.1097	4.15171	0.117427	0.137538	62.7914	4.845	10.4211	1.2924	4.76592	1.21028	0.181719	1.12419	0.180075	1.31997	0.268579	0.813486	0.116472	0.837218	0.111352	1.29425	0.266806	0.690457	0.82225	0.269795
035_IDDP-1_023.FIN2	IDDP	3.3857	0.905144	3038.87	155.726	7103.51	40293.5	22.825	3254.1	1264.91	258.439	61.3363	2987.82	<1.091	10.3681	7.19592	8.00179	51.6314	4.15916	0.112434	0.13915	60.365	4.59459	9.77031	1.14759	4.67549	1.04093	0.171295	1.02325	0.175861	1.253	0.289941	0.807701	0.135181	0.810815	0.148341	1.17934	0.295539	0.721149	0.904147	0.262003
036_IDDP-1_024.FIN2	IDDP	3.46293	0.877044	3073.54	152.599	7063.41	38534.1	24.8179	3085.19	1278.91	250.057	63.0743	3039.99	0.710454	8.74789	7.02552	6.93505	46.2979	3.80675	0.11848	0.121355	56.7781	4.38359	9.32544	1.11276	4.53749	1.00656	0.187285	1.14524	0.201535	1.25353	0.282031	0.770385	0.129824	0.8626	0.137949	1.36208	0.268141	0.747327	0.859653	0.285854
037_IDDP-1_025.FIN2	IDDP	4.04435	1.04642	3856.32	149.355	7730.31	43550.8	23.2483	3726.08	1373.14	287.516	65.7013	3182.06	0.792576	10.5794	7.73886	8.01867	52.3713	4.03505	<0.14401	0.127039	63.8822	4.81883	10.3072	1.20038	4.49881	1.13721	0.163778	1.22454	0.205197	1.55029	0.308594	0.945243	0.134769	0.92105	0.152455	1.49705	0.320123	0.701833	0.940916	0.253864
038_IDDP-1_026.FIN2	IDDP	4.29088	1.09641	3683.62	170.292	8003.34	43103.5	25.8264	3327.89	1378.96	282.091	66.6673	3189.22	0.815398	9.93217	7.9118	8.45971	56.4722	4.68426	0.0978898	0.14323	65.1644	4.83571	10.3832	1.17508	5.07059	1.18466	0.186995	1.15114	0.172813	1.28317	0.251352	0.875547	0.120015	0.871615	0.120769	1.33867	0.327677	0.729705	0.963003	0.273775
039_IDDP-1_027.FIN2	IDDP	4.06892	1.13698	3524.08	140.976	7667.05	42754.8	21.8536	3307.78	1265.13	263.148	56.9797	2737.3	0.778388	8.97824	7.08579	7.70507	52.3696	4.08404	0.113261	0.137022	66.934	5.13558	11.2775	1.20635	4.72095	1.11758	0.206442	1.41907	0.197504	1.4407	0.292661	0.953263	0.173622	1.00879	0.162781	1.54173	0.32351	0.693732	0.939502	0.310227
040_IDDP-1_028.FIN2	IDDP	3.39334	0.894303	3058.27	122.181	6681.38	35317.2	19.9082	2732.56	1083.86	234.884	54.1964	2665.66	0.66906	9.04755	6.47313	7.18172	47.2434	3.93424	0.108204	0.115605	59.8042	4.4374	9.7695	1.13981	4.41858	1.04966	0.207803	1.12383	0.220451	1.2371	0.282198	0.837997	0.121291	1.07186	0.139337	1.26196	0.309936	0.669374	0.957253	0.280741
041_IDDP-1_029.FIN2	IDDP	2.02287	0.63143	1808.65	80.2795	3645.93	24571.4	15.341	1693.12	605.795	135.579	30.1677	1435.05	0.506461	5.23581	4.15325	3.44286	25.4897	1.92797	0.0808222	0.0990058	35.0039	2.42352	4.89476	0.571876	2.87033	0.632597	0.115642	0.77928	0.122508	0.773467	0.153732	0.463157	0.0850514	0.447633	0.0822149	0.818142	0.284373	0.466015	0.578208	0.168528
042_IDDP-1_030.FIN2	IDDP	1.67476	0.648477	1696.9	67.8724	3668.21	21212	11.5162	1490.49	752.361	112.605	31.1161	1769.78	0.477007	4.02258	2.81908	3.01894	22.4488	1.84739	0.086424	0.0704799	25.8984	2.07305	4.5317	0.463917	2.21028	0.856652	0.118411	0.789681	0.141051	0.59687	0.129628	0.576737	0.0911508	0.634948	0.0998276	0.571677	0.146806	0.33594	0.424089	0.109726
SAMPLES: Limits of Detection Summary
File	Info	Li7	B11	Na23	Mg25	Al27	Si29	P31	K39	Ca43	Ti49	Mn55	Fe57	As75	Rb85	Sr88	Y89	Zr90	Nb93	Sb121	Cs133	Ba138	La139	Ce140	Pr141	Nd146	Sm147	Eu151	Gd157	Tb159	Dy163	Ho165	Er166	Tm169	Yb173	Lu175	Hf180	Ta181	Pb208	Th232	U238
		µg/g	µg/g	µg/g	µg/g	µg/g	µg/g	µg/g	µg/g	µg/g	µg/g	µg/g	µg/g	µg/g	µg/g	µg/g	µg/g	µg/g	µg/g	µg/g	µg/g	µg/g	µg/g	µg/g	µg/g	µg/g	µg/g	µg/g	µg/g	µg/g	µg/g	µg/g	µg/g	µg/g	µg/g	µg/g	µg/g	µg/g	µg/g	µg/g	µg/g
003_ATHO-G.FIN2	ATHO	1.32921	1.63046	6.08915	1.63898	1.02294	77.2074	17.7842	9.76527	205.755	0.902952	0.41569	22.6318	1.1619	0.13498	0.220145	0.0330795	0.0274829	0.0145317	0.179449	0.062332	0.0588794	0.0154426	0.0158231	0.0124304	0.0439523	0.0327496	0.0175975	0.0976123	0.015193	0.0305664	0.00615743	0.0129608	0.00557244	0.0442561	0.0150929	0.0274838	0.00910248	0.0331681	0.0227484	0.00643043
004_ATHO-G.FIN2	ATHO	1.23598	1.5061	5.70385	1.50008	0.988045	71.2625	16.4332	8.98259	196.196	0.912939	0.383087	21.0901	1.05204	0.117804	0.198864	0.0318585	0.0155495	0.0146696	0.166019	0.0580858	0.0529961	0.0190056	0.0152981	0.011853	0.0402669	0.0105933	0.00982466	0.091154	0.0150832	0.0219461	0.00432095	0.0203512	0.00351236	0.0426243	0.0104761	0.0132635	0.0129161	0.0331089	0.0207485	0.00137655
005_NIST610.FIN2	NIST610	1.3863	1.72155	6.56318	1.69811	1.18246	80.5872	18.7459	10.1199	218.846	1.17837	0.434936	23.8523	1.19081	0.142432	0.23189	0.0349327	0.0147782	0.0187729	0.198138	0.0627661	0.0600454	0.0242143	0.0111558	0.0136502	0.0552305	0.0513986	0.0151167	0.114785	0.0161417	0.0331807	0.00632747	0.017395	0.00471884	0.0101771	0.0113438	0.021878	0.0121307	0.0310507	0.0234289	0.00505753
006_NIST610.FIN2	NIST610	1.48347	1.79272	7.117	1.78933	1.23799	85.6567	19.8931	10.6041	234.689	1.19029	0.473397	24.5406	1.28884	0.154422	0.243381	0.0381737	0.0194131	0.0199403	0.235989	0.0726656	0.0640904	0.017279	0.00852091	0.0181031	0.0658349	0.014676	0.0225073	0.120232	0.0173619	0.0428608	0.00724988	0.0288981	0.00766145	0.0120446	0.0152288	0.0209024	0.0136812	0.0494545	0.0251178	0.00191049
007_IDDP-1_001.FIN2	IDDP	2.02274	2.34698	9.77914	2.54188	1.66754	109.809	25.9303	13.5896	305.804	1.59724	0.615601	33.6016	1.72711	0.206737	0.323622	0.0446394	0.0299606	0.0162587	0.294982	0.0982537	0.092602	0.0303564	0.0203481	0.0162744	0.0661771	0.0471837	0.0416532	0.16005	0.0218408	0.0576096	0.0103526	0.0372277	0.0156604	0.0656307	0.0170411	0.0187057	0.011002	0.062526	0.0311697	0.00223747
008_IDDP-1_002.FIN2	IDDP	2.1647	2.57676	10.4087	2.60733	1.81388	118.135	27.5437	14.4149	341.945	1.66156	0.64794	36.1456	1.77922	0.220462	0.357672	0.0550066	0.0341551	0.0216359	0.291491	0.102	0.107901	0.0281127	0.0201509	0.0151781	0.0543146	0.0669135	0.0233868	0.185491	0.0132579	0.0511437	0.00993416	0.0360731	0.0114074	0.0859618	0.0245123	0.0216173	0.0127301	0.0598391	0.0340103	0.00240899
009_IDDP-1_003.FIN2	IDDP	1.25334	1.41098	5.99129	1.61338	1.07252	69.0808	16.0895	8.28547	193.717	1.04423	0.376756	20.5313	1.02295	0.125128	0.205848	0.0330417	0.0258041	0.0118942	0.159852	0.0602202	0.0560949	0.0168407	0.0122379	0.00614848	0.0455682	0.0398625	0.0207475	0.104746	0.0151331	0.0261112	0.00651875	0.0206972	0.00952305	0.0245945	0.00699997	0.0041219	0.00509714	0.0333813	0.020007	0.00131099
010_IDDP-1_004.FIN2	IDDP	1.39512	1.62436	6.39464	1.72309	1.18224	71.9338	17.564	8.92774	209.745	1.15517	0.404359	21.9959	1.07551	0.142085	0.212297	0.028353	0.0337608	0.0124838	0.169185	0.0649897	0.0639477	0.0196644	0.0164722	0.00149479	0.0404143	0.0396263	0.02351	0.0862571	0.011581	0.0262244	0.00980587	0.0279737	0.00740305	0.00917342	0.0127453	0.0191406	0.0168399	0.0306691	0.0199743	0.0014568
011_IDDP-1_005.FIN2	IDDP	1.40253	1.5373	6.42531	1.58144	1.22715	71.7319	17.6382	8.94655	211.283	0.99153	0.396047	21.6942	1.11166	0.139713	0.214523	0.025729	0.0237882	0.0133754	0.165601	0.0667248	0.0646576	0.0194706	0.0141205	0.00857169	0.0558281	0.0488531	0.02305	0.107579	0.0153353	0.0244524	0.00716418	0.0247831	0.0064818	0.0424661	0.0130952	0.0242241	0.0121184	0.034907	0.0196499	0.0014917
012_IDDP-1_006.FIN2	IDDP	1.39008	1.59116	6.44991	1.71556	1.23731	72.0107	17.5987	8.92742	215.147	1.07941	0.403143	21.7928	1.06533	0.142036	0.220569	0.0340984	0.0291584	0.0138377	0.145239	0.0661602	0.0646013	0.0161107	0.0152345	0.00987971	0.0554888	0.0461093	0.0196648	0.122771	0.0126658	0.0167395	0.00719735	0.0203956	0.0093831	0.0296673	0.0116233	0.01481	0.0156481	0.0412401	0.0218799	0.00154055
013_IDDP-1_007.FIN2	IDDP	1.47311	1.77467	6.72114	1.66727	1.31473	74.8887	18.3006	9.16505	225.064	1.27398	0.423662	22.8555	1.11243	0.14222	0.230731	0.0324623	0.0243982	0.0186447	0.160628	0.0680925	0.0692029	0.0209448	0.00851529	0.00648343	0.0469772	0.0119793	0.019659	0.110204	0.0121447	0.0308951	0.00554777	0.0208047	0.00747781	0.0322076	0.0165425	0.0128115	0.0130521	0.0418432	0.0232514	0.00456982
014_IDDP-1_008.FIN2	IDDP	1.41591	1.45747	6.56449	1.73193	1.31615	72.7152	17.8602	8.91792	215.21	1.20226	0.40796	22.6957	1.09135	0.145868	0.220513	0.03081	0.0141292	0.0112616	0.151799	0.0656048	0.064801	0.0200041	0.0146001	0.010832	0.0516593	0.0457659	0.0226401	0.104434	0.010827	0.0375013	0.00534746	0.0164583	0.00575532	0.00984275	0.0149676	0.0140178	0.0114169	0.0320749	0.0204814	0.00156502
015_IDDP-1_009.FIN2	IDDP	1.40203	1.53226	6.40752	1.54645	1.30085	71.1754	17.6302	8.66726	211.318	1.04083	0.405887	21.6525	1.05758	0.150794	0.216251	0.0325438	0.0272733	0.0138175	0.151873	0.0662293	0.065269	0.0166244	0.0102537	0.00646755	0.0589811	0.0529313	0.0236473	0.0970214	0.0129524	0.0172082	0.00855472	0.01863	0.00728486	0.0491942	0.015134	0.0210466	0.0115615	0.0353208	0.0185654	0.00141655
016_IDDP-1_010.FIN2	IDDP	1.36064	1.5754	6.41496	1.74047	1.32542	71.2589	17.5122	8.6473	216.323	1.18013	0.40398	21.9742	1.05886	0.145441	0.207834	0.0327565	0.0257718	0.0179181	0.153295	0.0628951	0.069891	0.0218331	0.0165464	0.013495	0.063711	0.011283	0.0171677	0.117977	0.0121442	0.0299845	0.00151116	0.0202595	0.00656882	0.0300206	0.00902015	0.0213223	0.0128793	0.0287784	0.0263619	0.00147968
017_IDDP-1_011.FIN2	IDDP	1.35798	1.53161	6.32326	1.61363	1.31685	70.6013	17.226	8.40707	206.181	0.954847	0.39135	21.4854	1.08065	0.143573	0.213095	0.0333893	0.00496276	0.0135251	0.142463	0.066624	0.0663673	0.0177841	0.0166806	0.00881056	0.0533467	0.0589109	0.0189446	0.0996929	0.0127317	0.0327611	0.00423103	0.0305519	0.00696271	0.00953862	0.0129438	0.0195043	0.0125802	0.0358767	0.0169337	0.00151818
018_IDDP-1_012.FIN2	IDDP	1.6084	1.80204	7.26872	2.04345	1.55048	81.8542	19.7071	9.63328	245.77	1.41344	0.453658	24.6882	1.23295	0.166662	0.245163	0.0333824	0.0314765	0.0139625	0.176912	0.0791863	0.0767056	0.018907	0.0151258	0.0153207	0.0601469	0.0114087	0.00346147	0.140745	0.0130941	0.0335232	0.00992435	0.0160505	0.00752814	0.00941587	0.00930409	0.00470088	0.0160794	0.0352918	0.0261987	0.00149903
019_IDDP-1_013.FIN2	IDDP	1.38617	1.55541	6.50628	1.77564	1.39437	72.12	17.6952	8.53652	221.351	1.11305	0.404823	22.4766	1.07162	0.141465	0.216978	0.0350275	0.0310132	0.0124937	0.152152	0.0608551	0.0727137	0.0201273	0.0139618	0.0131256	0.0101844	0.0576704	0.0241417	0.0930778	0.0100962	0.0276612	0.00975472	0.0133221	0.0080772	0.0475143	0.0128654	0.0143428	0.00854939	0.0320969	0.02474	0.00164792
020_IDDP-1_014.FIN2	IDDP	1.56787	1.79604	7.34444	2.01127	1.59179	81.5737	19.9479	9.55897	246.534	1.27288	0.46101	25.1234	1.21838	0.163867	0.252502	0.0367332	0.0312945	0.015993	0.15858	0.074108	0.0839448	0.0233764	0.0142165	0.0103119	0.011218	0.0998709	0.0275477	0.0978163	0.0102677	0.0445293	0.0111527	0.0177111	0.00827591	0.0368015	0.0124519	0.0212236	0.0191085	0.0376425	0.0246845	0.0018162
021_IDDP-1_015.FIN2	IDDP	1.77387	2.07556	8.31739	2.29598	1.81254	91.9381	22.6274	10.7472	278.632	1.49452	0.531829	28.155	1.41973	0.188444	0.279661	0.0429998	0.0543028	0.0272443	0.187061	0.0844501	0.0982877	0.0224233	0.0171557	0.0143538	0.0639408	0.0545608	0.0322907	0.168747	0.0198812	0.0689431	0.0115791	0.0340451	0.0125984	0.0222122	0.0152573	0.0232108	0.0182649	0.0504082	0.0315448	0.00962794
024_ATHO-G.FIN2	ATHO	1.39547	1.72799	6.77105	1.73109	1.45204	77.952	19.1854	8.80821	223.218	1.14304	0.429184	23.3414	1.13407	0.151839	0.226674	0.0287863	0.0440529	0.00280777	0.154092	0.0678179	0.0681889	0.020606	0.0119903	0.00738426	0.0610241	0.0600333	0.0182227	0.13327	0.0136632	0.0226862	0.00725913	0.031893	0.00159651	0.0332411	0.0121557	0.025793	0.0151862	0.0413456	0.0257025	0.00164306
025_ATHO-G.FIN2	ATHO	1.25546	1.57378	6.19113	1.55165	1.33711	70.119	17.1868	7.92567	205.826	1.01635	0.396225	21.024	1.04396	0.1322	0.20455	0.0291671	0.0296353	0.0147585	0.142042	0.0618544	0.0718448	0.0210682	0.011048	0.00745745	0.0371276	0.0632253	0.014488	0.0986878	0.0149154	0.00618695	0.0062344	0.0275608	0.00149805	0.0360037	0.0134778	0.0134354	0.0120089	0.032506	0.0226957	0.00154246
026_NIST610.FIN2	NIST610	1.47228	1.66986	7.22133	1.96925	1.57735	81.1705	19.6538	9.1068	237.72	1.13398	0.439535	24.4655	1.20975	0.154061	0.232142	0.0326046	0.0293796	0.015454	0.179263	0.0711514	0.0722108	0.023654	0.0175385	0.00555428	0.0476473	0.0136184	0.0239223	0.128489	0.0157029	0.0436473	0.00618838	0.00542301	0.011047	0.0492383	0.0136626	0.0172394	0.0128837	0.0372823	0.0275944	0.00180115
027_NIST610.FIN2	NIST610	1.4703	1.68279	7.19434	1.86467	1.55624	79.2681	19.4325	8.74938	233.933	1.18565	0.446731	23.7576	1.19823	0.16484	0.237893	0.0431834	0.0362815	0.0188937	0.213774	0.0724025	0.0765747	0.0271885	0.0194212	0.0137746	0.0189464	0.0876011	0.00707342	0.0984283	0.0123332	0.0480398	0.0118041	0.0286986	0.00651924	0.0390412	0.0140697	0.0194942	0.0143467	0.0334738	0.0259606	0.00308545
028_IDDP-1_016.FIN2	IDDP	1.43903	1.51621	7.27616	1.81416	1.51115	75.019	18.6019	8.27405	234.969	1.23657	0.428535	23.1149	1.16806	0.15645	0.22777	0.0391047	0.0349086	0.0129208	0.185978	0.0738415	0.0799068	0.022834	0.0135903	0.00987414	0.0668046	0.0654821	0.0275238	0.098528	0.0169343	0.0261986	0.0081681	0.0214616	0.00616149	0.0421417	0.0131484	0.0210427	0.0107723	0.0456025	0.0227214	0.00166972
029_IDDP-1_017.FIN2	IDDP	1.42942	1.49131	7.31479	1.73075	1.51684	74.6552	18.5764	8.20097	234.879	1.29531	0.426507	23.2499	1.12989	0.16056	0.227575	0.0352262	0.0318302	0.0118403	0.164683	0.0726733	0.0813015	0.017315	0.0132969	0.00723529	0.0373397	0.0510505	0.0157893	0.102609	0.0179676	0.0346685	0.0104089	0.0242999	0.005837	0.0495297	0.0136676	0.0164968	0.0176682	0.0345127	0.0269639	0.00167919
030_IDDP-1_018.FIN2	IDDP	1.26015	1.43925	6.27134	1.60759	1.32653	63.7932	15.7967	6.95255	199.624	1.05101	0.365598	19.7315	0.947104	0.143311	0.199699	0.0333047	0.0216159	0.0137656	0.148432	0.0617224	0.065164	0.0163926	0.0146423	0.00998085	0.0673087	0.0405263	0.0140688	0.108403	0.0125971	0.0067976	0.0017276	0.00511115	0.0081593	0.040545	0.00805513	0.0152696	0.00905513	0.0325729	0.0202513	0.00170218
031_IDDP-1_019.FIN2	IDDP	1.24592	1.4027	6.46434	1.57069	1.38773	66.3064	16.3767	7.15636	205.417	1.17912	0.378852	20.3469	0.98037	0.140567	0.205433	0.0307155	0.0223079	0.0164043	0.145324	0.0605988	0.069824	0.011537	0.0154354	0.0079263	0.037424	0.0570565	0.0230964	0.0959715	0.0133505	0.0322915	0.00484991	0.0290262	0.00648241	0.0298904	0.0121923	0.00487821	0.0167894	0.0337682	0.0209917	0.00156229
032_IDDP-1_020.FIN2	IDDP	13.9094	15.25	69.4198	17.3906	15.2079	717.521	176.973	76.8483	224	12.3286	4.11659	221.699	10.8705	1.53696	2.20924	0.386271	0.335266	0.23296	1.6643	0.685597	0.71226	0.223294	0.158569	0.0920159	0.542392	0.767271	0.2453	1.13165	0.145624	0.300189	0.0609438	0.332014	0.0226697	0.146563	0.10493	0.301962	0.0663881	0.395969	0.247248	0.0234454
033_IDDP-1_021.FIN2	IDDP	1.40391	1.59152	7.04902	1.75705	1.55308	73.7408	18.4262	7.88995	227.126	1.15255	0.424095	23.2782	1.11416	0.152932	0.231854	0.0350233	0.0336693	0.0148705	0.151702	0.0681291	0.072981	0.0153463	0.0170575	0.0103827	0.0340381	0.0574756	0.0141066	0.128625	0.0173043	0.0330615	0.00564415	0.0192472	0.00594675	0.0568746	0.0098657	0.0157882	0.0144769	0.0324082	0.0168179	0.0059287
034_IDDP-1_022.FIN2	IDDP	1.45668	1.57268	7.10734	1.76882	1.57672	74.3611	18.3426	7.81309	238.532	1.06914	0.428539	22.9035	1.08088	0.159386	0.228459	0.0394704	0.0398054	0.0191259	0.144113	0.0711091	0.0755917	0.0180164	0.018604	0.0150834	0.0395995	0.0691114	0.0158017	0.108708	0.012238	0.0363322	0.00569788	0.0168475	0.00459611	0.0112063	0.0127375	0.00559624	0.014061	0.0363625	0.0306142	0.00179416
035_IDDP-1_023.FIN2	IDDP	1.35186	1.48765	6.72461	1.72502	1.5047	70.0012	17.3263	7.35523	219.079	1.21472	0.398272	21.565	1.09097	0.144854	0.218349	0.0318897	0.0410255	0.0206276	0.134238	0.0674249	0.0769193	0.0140924	0.0154803	0.0100535	0.0393142	0.0469958	0.023123	0.0986702	0.0130684	0.0436983	0.00469284	0.0143849	0.00995523	0.011376	0.0178205	0.00568105	0.0106662	0.0452576	0.0254288	0.00182185
036_IDDP-1_024.FIN2	IDDP	1.35685	1.46215	6.69147	1.66093	1.53505	70.02	17.4054	7.28375	219.888	1.08182	0.400681	21.3796	1.0164	0.145218	0.217496	0.0298666	0.0208696	0.0104772	0.146607	0.0668898	0.077468	0.0206308	0.0176652	0.0062496	0.0541718	0.0125476	0.0253784	0.129482	0.0124164	0.0457962	0.00547202	0.0245621	0.00823937	0.0494169	0.00695477	0.0179588	0.0124397	0.0444676	0.0250886	0.00167456
037_IDDP-1_025.FIN2	IDDP	1.42303	1.6471	7.07808	1.67686	1.62431	73.9362	18.2726	7.68073	232.762	1.22045	0.420748	23.0883	1.08298	0.156834	0.232185	0.0357666	0.0325936	0.0253977	0.144012	0.0651547	0.0755409	0.0203212	0.0155839	0.0127652	0.0547972	0.0132639	0.0298444	0.102589	0.0172519	0.046872	0.0108383	0.0271291	0.00443198	0.048238	0.0130734	0.0194479	0.0114839	0.0366951	0.0236088	0.00177144
038_IDDP-1_026.FIN2	IDDP	1.54251	1.71604	7.59051	1.965	1.76729	79.828	19.7215	8.21534	254.272	1.35105	0.456446	24.972	1.15904	0.167175	0.245541	0.0337575	0.0243017	0.0151105	0.162396	0.0748045	0.0872232	0.0195859	0.015671	0.00993483	0.011673	0.0399116	0.0232863	0.130443	0.0138949	0.00760764	0.00655177	0.0272816	0.00654143	0.0119597	0.0114402	0.023801	0.0144668	0.0441573	0.0240791	0.00191755
039_IDDP-1_027.FIN2	IDDP	1.42443	1.63673	7.17047	1.85403	1.67649	75.1096	18.7246	7.72362	236.908	1.16376	0.436044	23.5328	1.10363	0.159441	0.231049	0.0319795	0.0273598	0.0174891	0.15629	0.066242	0.0758251	0.0213748	0.0170405	0.00908276	0.0621674	0.0802113	0.0208482	0.115763	0.0117287	0.0327458	0.00833009	0.0297879	0.00980172	0.0549271	0.00580133	0.00529296	0.0145798	0.0397017	0.0291879	0.00169974
040_IDDP-1_028.FIN2	IDDP	1.28847	1.4191	6.44833	1.69835	1.52091	67.7974	16.7244	6.90679	213.372	1.02609	0.384312	20.9151	1.01217	0.139595	0.210925	0.0327441	0.0244933	0.0187812	0.139322	0.0666336	0.0738264	0.0146982	0.0121162	0.00849664	0.0479816	0.0592603	0.0244319	0.105667	0.0101459	0.0321517	0.0109967	0.025617	0.00904309	0.0477554	0.0108986	0.0165789	0.0110581	0.0399925	0.0229353	0.00163544
041_IDDP-1_029.FIN2	IDDP	1.0949	1.27959	5.35314	1.38492	1.28191	57.2175	14.2275	5.79417	180.874	0.919805	0.331754	17.4927	0.843079	0.117154	0.176687	0.0329701	0.0284782	0.0128551	0.119244	0.0508571	0.061592	0.0124806	0.0126936	0.0063373	0.0343292	0.0336907	0.017094	0.0923195	0.0100985	0.0268745	0.00791502	0.0238892	0.00554528	0.0129007	0.00642194	0.013251	0.00685351	0.0320629	0.0175159	0.00207025
042_IDDP-1_030.FIN2	IDDP	1.15279	1.36929	5.80853	1.45913	1.39979	62.0828	15.2566	6.21521	194.379	1.11635	0.35656	19.5701	0.956623	0.131658	0.19153	0.0301858	0.0314075	0.0163198	0.132051	0.058566	0.0717166	0.0168371	0.0129965	0.00949698	0.04181	0.0210043	0.0125684	0.0758062	0.0130951	0.0447202	0.0106657	0.028606	0.00940215	0.0402367	0.00987698	0.0283875	0.0149369	0.0312072	0.0231673	0.0028196

## Sheet: Table S4 Xray-Fl-Correction
X-Ray fluorescence correction based on parameters of the run (15 KV), rhyolitic glass, zircon.
TO/keV/Elm/Xray	Distance (um)	Total Inten. %	Fluor. Only %	Fluor. A Only %	Fluor. B Only %	Pri. Int. Only %	Calc. Total Conc. %	Calc. A Flu Conc. %	Calc. B Flu Conc. %	Calc. Pri. Conc. %	Meas. Total Inten. %	Meas. ZAF	Meas. Total Conc. %	Actual A Conc. %	Actual B Conc. %	Actual B Std Conc. %	ZA u/s (Fanal)	Flu u/s (Fanal)	ZAF u/s (Fanal)	ZA u/s (CalcZAF)	Flu u/s (CalcZAF)	ZAF u/s (CalcZAF)	A Abs (CalcZAF)	A Flu (CalcZAF)	A Zed (CalcZAF)	A ZAF (CalcZAF)	B Abs (CalcZAF)	B Flu (CalcZAF)	B Zed (CalcZAF)	B ZAF (CalcZAF)	B Std Abs (CalcZAF)	B Std Flu (CalcZAF)	B Std Zed (CalcZAF)	B Std ZAF (CalcZAF)	Distance (ug/cm2)
40/15/Zr/la	-1	0.053655	0.053655	0	0.053655	0	0.032624	0	0.032624	0	0	0	0	0	49.7624	49.7624	0	0	0	1.22183	1.00002	1.22185	1.16873	1	1.2383	1.44724	1.05257	0.999984	1.12532	1.18447	1.05257	0.999984	1.12532	1.18447	500
40/15/Zr/la	-2	0.031234	0.031234	0	0.031234	0	0.018991	0	0.018991	0	0	0	0	0	49.7624	49.7624	0	0	0	1.22183	1.00002	1.22185	1.16873	1	1.2383	1.44724	1.05257	0.999984	1.12532	1.18447	1.05257	0.999984	1.12532	1.18447	1000
40/15/Zr/la	-3	0.020662	0.020662	0	0.020662	0	0.012563	0	0.012563	0	0	0	0	0	49.7624	49.7624	0	0	0	1.22183	1.00002	1.22185	1.16873	1	1.2383	1.44724	1.05257	0.999984	1.12532	1.18447	1.05257	0.999984	1.12532	1.18447	1500
40/15/Zr/la	-4	0.01472	0.01472	0	0.01472	0	0.00895	0	0.00895	0	0	0	0	0	49.7624	49.7624	0	0	0	1.22183	1.00002	1.22185	1.16873	1	1.2383	1.44724	1.05257	0.999984	1.12532	1.18447	1.05257	0.999984	1.12532	1.18447	2000
40/15/Zr/la	-5	0.01103	0.01103	0	0.01103	0	0.006706	0	0.006706	0	0	0	0	0	49.7624	49.7624	0	0	0	1.22183	1.00002	1.22185	1.16873	1	1.2383	1.44724	1.05257	0.999984	1.12532	1.18447	1.05257	0.999984	1.12532	1.18447	2500
40/15/Zr/la	-6	0.008578	0.008578	0	0.008578	0	0.005215	0	0.005215	0	0	0	0	0	49.7624	49.7624	0	0	0	1.22183	1.00002	1.22185	1.16873	1	1.2383	1.44724	1.05257	0.999984	1.12532	1.18447	1.05257	0.999984	1.12532	1.18447	3000
40/15/Zr/la	-7	0.006866	0.006866	0	0.006866	0	0.004175	0	0.004175	0	0	0	0	0	49.7624	49.7624	0	0	0	1.22183	1.00002	1.22185	1.16873	1	1.2383	1.44724	1.05257	0.999984	1.12532	1.18447	1.05257	0.999984	1.12532	1.18447	3500
40/15/Zr/la	-8	0.005624	0.005624	0	0.005624	0	0.003419	0	0.003419	0	0	0	0	0	49.7624	49.7624	0	0	0	1.22183	1.00002	1.22185	1.16873	1	1.2383	1.44724	1.05257	0.999984	1.12532	1.18447	1.05257	0.999984	1.12532	1.18447	4000
40/15/Zr/la	-9	0.004694	0.004694	0	0.004694	0	0.002854	0	0.002854	0	0	0	0	0	49.7624	49.7624	0	0	0	1.22183	1.00002	1.22185	1.16873	1	1.2383	1.44724	1.05257	0.999984	1.12532	1.18447	1.05257	0.999984	1.12532	1.18447	4500
40/15/Zr/la	-10	0.00398	0.00398	0	0.00398	0	0.00242	0	0.00242	0	0	0	0	0	49.7624	49.7624	0	0	0	1.22183	1.00002	1.22185	1.16873	1	1.2383	1.44724	1.05257	0.999984	1.12532	1.18447	1.05257	0.999984	1.12532	1.18447	5000
40/15/Zr/la	-11	0.00342	0.00342	0	0.00342	0	0.002079	0	0.002079	0	0	0	0	0	49.7624	49.7624	0	0	0	1.22183	1.00002	1.22185	1.16873	1	1.2383	1.44724	1.05257	0.999984	1.12532	1.18447	1.05257	0.999984	1.12532	1.18447	5500
40/15/Zr/la	-12	0.002972	0.002972	0	0.002972	0	0.001807	0	0.001807	0	0	0	0	0	49.7624	49.7624	0	0	0	1.22183	1.00002	1.22185	1.16873	1	1.2383	1.44724	1.05257	0.999984	1.12532	1.18447	1.05257	0.999984	1.12532	1.18447	6000
40/15/Zr/la	-13	0.002608	0.002608	0	0.002608	0	0.001586	0	0.001586	0	0	0	0	0	49.7624	49.7624	0	0	0	1.22183	1.00002	1.22185	1.16873	1	1.2383	1.44724	1.05257	0.999984	1.12532	1.18447	1.05257	0.999984	1.12532	1.18447	6500
40/15/Zr/la	-14	0.002309	0.002309	0	0.002309	0	0.001404	0	0.001404	0	0	0	0	0	49.7624	49.7624	0	0	0	1.22183	1.00002	1.22185	1.16873	1	1.2383	1.44724	1.05257	0.999984	1.12532	1.18447	1.05257	0.999984	1.12532	1.18447	7000
40/15/Zr/la	-15	0.002058	0.002058	0	0.002058	0	0.001252	0	0.001252	0	0	0	0	0	49.7624	49.7624	0	0	0	1.22183	1.00002	1.22185	1.16873	1	1.2383	1.44724	1.05257	0.999984	1.12532	1.18447	1.05257	0.999984	1.12532	1.18447	7500
40/15/Zr/la	-16	0.001848	0.001848	0	0.001848	0	0.001123	0	0.001123	0	0	0	0	0	49.7624	49.7624	0	0	0	1.22183	1.00002	1.22185	1.16873	1	1.2383	1.44724	1.05257	0.999984	1.12532	1.18447	1.05257	0.999984	1.12532	1.18447	8000
40/15/Zr/la	-17	0.001668	0.001668	0	0.001668	0	0.001014	0	0.001014	0	0	0	0	0	49.7624	49.7624	0	0	0	1.22183	1.00002	1.22185	1.16873	1	1.2383	1.44724	1.05257	0.999984	1.12532	1.18447	1.05257	0.999984	1.12532	1.18447	8500
40/15/Zr/la	-18	0.001514	0.001514	0	0.001513	0	0.00092	0	0.00092	0	0	0	0	0	49.7624	49.7624	0	0	0	1.22183	1.00002	1.22185	1.16873	1	1.2383	1.44724	1.05257	0.999984	1.12532	1.18447	1.05257	0.999984	1.12532	1.18447	9000
40/15/Zr/la	-19	0.00138	0.00138	0	0.00138	0	0.000839	0	0.000839	0	0	0	0	0	49.7624	49.7624	0	0	0	1.22183	1.00002	1.22185	1.16873	1	1.2383	1.44724	1.05257	0.999984	1.12532	1.18447	1.05257	0.999984	1.12532	1.18447	9500
40/15/Zr/la	-20	0.001263	0.001263	0	0.001263	0	0.000768	0	0.000768	0	0	0	0	0	49.7624	49.7624	0	0	0	1.22183	1.00002	1.22185	1.16873	1	1.2383	1.44724	1.05257	0.999984	1.12532	1.18447	1.05257	0.999984	1.12532	1.18447	10000
40/15/Zr/la	-21	0.001161	0.001161	0	0.001161	0	0.000706	0	0.000706	0	0	0	0	0	49.7624	49.7624	0	0	0	1.22183	1.00002	1.22185	1.16873	1	1.2383	1.44724	1.05257	0.999984	1.12532	1.18447	1.05257	0.999984	1.12532	1.18447	10500
40/15/Zr/la	-22	0.00107	0.00107	0	0.00107	0	0.000651	0	0.000651	0	0	0	0	0	49.7624	49.7624	0	0	0	1.22183	1.00002	1.22185	1.16873	1	1.2383	1.44724	1.05257	0.999984	1.12532	1.18447	1.05257	0.999984	1.12532	1.18447	11000
40/15/Zr/la	-23	0.000989	0.000989	0	0.000989	0	0.000602	0	0.000602	0	0	0	0	0	49.7624	49.7624	0	0	0	1.22183	1.00002	1.22185	1.16873	1	1.2383	1.44724	1.05257	0.999984	1.12532	1.18447	1.05257	0.999984	1.12532	1.18447	11500
40/15/Zr/la	-24	0.000918	0.000918	0	0.000918	0	0.000558	0	0.000558	0	0	0	0	0	49.7624	49.7624	0	0	0	1.22183	1.00002	1.22185	1.16873	1	1.2383	1.44724	1.05257	0.999984	1.12532	1.18447	1.05257	0.999984	1.12532	1.18447	12000
40/15/Zr/la	-25	0.000853	0.000853	0	0.000853	0	0.000519	0	0.000519	0	0	0	0	0	49.7624	49.7624	0	0	0	1.22183	1.00002	1.22185	1.16873	1	1.2383	1.44724	1.05257	0.999984	1.12532	1.18447	1.05257	0.999984	1.12532	1.18447	12500
40/15/Zr/la	-26	0.000795	0.000795	0	0.000795	0	0.000483	0	0.000483	0	0	0	0	0	49.7624	49.7624	0	0	0	1.22183	1.00002	1.22185	1.16873	1	1.2383	1.44724	1.05257	0.999984	1.12532	1.18447	1.05257	0.999984	1.12532	1.18447	13000
40/15/Zr/la	-27	0.000743	0.000743	0	0.000743	0	0.000452	0	0.000452	0	0	0	0	0	49.7624	49.7624	0	0	0	1.22183	1.00002	1.22185	1.16873	1	1.2383	1.44724	1.05257	0.999984	1.12532	1.18447	1.05257	0.999984	1.12532	1.18447	13500
40/15/Zr/la	-28	0.000695	0.000695	0	0.000695	0	0.000423	0	0.000423	0	0	0	0	0	49.7624	49.7624	0	0	0	1.22183	1.00002	1.22185	1.16873	1	1.2383	1.44724	1.05257	0.999984	1.12532	1.18447	1.05257	0.999984	1.12532	1.18447	14000
40/15/Zr/la	-29	0.000652	0.000652	0	0.000652	0	0.000396	0	0.000396	0	0	0	0	0	49.7624	49.7624	0	0	0	1.22183	1.00002	1.22185	1.16873	1	1.2383	1.44724	1.05257	0.999984	1.12532	1.18447	1.05257	0.999984	1.12532	1.18447	14500
40/15/Zr/la	-30	0.000612	0.000612	0	0.000612	0	0.000372	0	0.000372	0	0	0	0	0	49.7624	49.7624	0	0	0	1.22183	1.00002	1.22185	1.16873	1	1.2383	1.44724	1.05257	0.999984	1.12532	1.18447	1.05257	0.999984	1.12532	1.18447	15000
40/15/Zr/la	-31	0.000576	0.000576	0	0.000576	0	0.00035	0	0.00035	0	0	0	0	0	49.7624	49.7624	0	0	0	1.22183	1.00002	1.22185	1.16873	1	1.2383	1.44724	1.05257	0.999984	1.12532	1.18447	1.05257	0.999984	1.12532	1.18447	15500
40/15/Zr/la	-32	0.000543	0.000543	0	0.000543	0	0.00033	0	0.00033	0	0	0	0	0	49.7624	49.7624	0	0	0	1.22183	1.00002	1.22185	1.16873	1	1.2383	1.44724	1.05257	0.999984	1.12532	1.18447	1.05257	0.999984	1.12532	1.18447	16000
40/15/Zr/la	-33	0.000512	0.000512	0	0.000512	0	0.000311	0	0.000311	0	0	0	0	0	49.7624	49.7624	0	0	0	1.22183	1.00002	1.22185	1.16873	1	1.2383	1.44724	1.05257	0.999984	1.12532	1.18447	1.05257	0.999984	1.12532	1.18447	16500
40/15/Zr/la	-34	0.000484	0.000484	0	0.000484	0	0.000294	0	0.000294	0	0	0	0	0	49.7624	49.7624	0	0	0	1.22183	1.00002	1.22185	1.16873	1	1.2383	1.44724	1.05257	0.999984	1.12532	1.18447	1.05257	0.999984	1.12532	1.18447	17000
40/15/Zr/la	-35	0.000458	0.000458	0	0.000458	0	0.000278	0	0.000278	0	0	0	0	0	49.7624	49.7624	0	0	0	1.22183	1.00002	1.22185	1.16873	1	1.2383	1.44724	1.05257	0.999984	1.12532	1.18447	1.05257	0.999984	1.12532	1.18447	17500
40/15/Zr/la	-36	0.000434	0.000434	0	0.000434	0	0.000264	0	0.000264	0	0	0	0	0	49.7624	49.7624	0	0	0	1.22183	1.00002	1.22185	1.16873	1	1.2383	1.44724	1.05257	0.999984	1.12532	1.18447	1.05257	0.999984	1.12532	1.18447	18000
40/15/Zr/la	-37	0.000411	0.000411	0	0.000411	0	0.00025	0	0.00025	0	0	0	0	0	49.7624	49.7624	0	0	0	1.22183	1.00002	1.22185	1.16873	1	1.2383	1.44724	1.05257	0.999984	1.12532	1.18447	1.05257	0.999984	1.12532	1.18447	18500
40/15/Zr/la	-38	0.00039	0.00039	0	0.00039	0	0.000237	0	0.000237	0	0	0	0	0	49.7624	49.7624	0	0	0	1.22183	1.00002	1.22185	1.16873	1	1.2383	1.44724	1.05257	0.999984	1.12532	1.18447	1.05257	0.999984	1.12532	1.18447	19000
40/15/Zr/la	-39	0.000371	0.000371	0	0.000371	0	0.000226	0	0.000226	0	0	0	0	0	49.7624	49.7624	0	0	0	1.22183	1.00002	1.22185	1.16873	1	1.2383	1.44724	1.05257	0.999984	1.12532	1.18447	1.05257	0.999984	1.12532	1.18447	19500
40/15/Zr/la	-40	0.000353	0.000353	0	0.000353	0	0.000215	0	0.000215	0	0	0	0	0	49.7624	49.7624	0	0	0	1.22183	1.00002	1.22185	1.16873	1	1.2383	1.44724	1.05257	0.999984	1.12532	1.18447	1.05257	0.999984	1.12532	1.18447	20000
40/15/Zr/la	-41	0.000336	0.000336	0	0.000336	0	0.000204	0	0.000204	0	0	0	0	0	49.7624	49.7624	0	0	0	1.22183	1.00002	1.22185	1.16873	1	1.2383	1.44724	1.05257	0.999984	1.12532	1.18447	1.05257	0.999984	1.12532	1.18447	20500
40/15/Zr/la	-42	0.00032	0.00032	0	0.00032	0	0.000195	0	0.000195	0	0	0	0	0	49.7624	49.7624	0	0	0	1.22183	1.00002	1.22185	1.16873	1	1.2383	1.44724	1.05257	0.999984	1.12532	1.18447	1.05257	0.999984	1.12532	1.18447	21000
40/15/Zr/la	-43	0.000305	0.000305	0	0.000305	0	0.000186	0	0.000186	0	0	0	0	0	49.7624	49.7624	0	0	0	1.22183	1.00002	1.22185	1.16873	1	1.2383	1.44724	1.05257	0.999984	1.12532	1.18447	1.05257	0.999984	1.12532	1.18447	21500
40/15/Zr/la	-44	0.000291	0.000291	0	0.000291	0	0.000177	0	0.000177	0	0	0	0	0	49.7624	49.7624	0	0	0	1.22183	1.00002	1.22185	1.16873	1	1.2383	1.44724	1.05257	0.999984	1.12532	1.18447	1.05257	0.999984	1.12532	1.18447	22000
40/15/Zr/la	-45	0.000278	0.000278	0	0.000278	0	0.000169	0	0.000169	0	0	0	0	0	49.7624	49.7624	0	0	0	1.22183	1.00002	1.22185	1.16873	1	1.2383	1.44724	1.05257	0.999984	1.12532	1.18447	1.05257	0.999984	1.12532	1.18447	22500
40/15/Zr/la	-46	0.000266	0.000266	0	0.000266	0	0.000162	0	0.000162	0	0	0	0	0	49.7624	49.7624	0	0	0	1.22183	1.00002	1.22185	1.16873	1	1.2383	1.44724	1.05257	0.999984	1.12532	1.18447	1.05257	0.999984	1.12532	1.18447	23000
40/15/Zr/la	-47	0.000255	0.000255	0	0.000255	0	0.000155	0	0.000155	0	0	0	0	0	49.7624	49.7624	0	0	0	1.22183	1.00002	1.22185	1.16873	1	1.2383	1.44724	1.05257	0.999984	1.12532	1.18447	1.05257	0.999984	1.12532	1.18447	23500
40/15/Zr/la	-48	0.000244	0.000244	0	0.000244	0	0.000148	0	0.000148	0	0	0	0	0	49.7624	49.7624	0	0	0	1.22183	1.00002	1.22185	1.16873	1	1.2383	1.44724	1.05257	0.999984	1.12532	1.18447	1.05257	0.999984	1.12532	1.18447	24000
40/15/Zr/la	-49	0.000233	0.000233	0	0.000233	0	0.000142	0	0.000142	0	0	0	0	0	49.7624	49.7624	0	0	0	1.22183	1.00002	1.22185	1.16873	1	1.2383	1.44724	1.05257	0.999984	1.12532	1.18447	1.05257	0.999984	1.12532	1.18447	24500
40/15/Zr/la	-50	0.000224	0.000224	0	0.000224	0	0.000136	0	0.000136	0	0	0	0	0	49.7624	49.7624	0	0	0	1.22183	1.00002	1.22185	1.16873	1	1.2383	1.44724	1.05257	0.999984	1.12532	1.18447	1.05257	0.999984	1.12532	1.18447	25000
X-Ray fluorescence correction on Ti-in-zircon for zircon-Ti-magnetite pair at (15 KV).
Characteristic	line:	22	K	L3
E0	(eV)	=	15000		ZAF=1.1060
E(eV)	d(mum)	K-rat (%)	K-rat (ppm)		Con(ppm)
15000	1	0.052351	523.51		579.002
15000	2	0.0409005	409.01		452.365
15000	3	0.0331788	331.79		366.96
15000	4	0.0275182	275.18		304.349
15000	5	0.0231785	231.79		256.36
15000	6	0.0197534	197.53		218.468
15000	7	0.0169935	169.94		187.954
15000	8	0.0147339	147.34		162.958
15000	9	0.0128605	128.61		142.243
15000	10	0.0112909	112.91		124.878
15000	11	0.00996434	99.64		110.202
15000	12	0.00883457	88.35		97.7151
15000	13	0.00786602	78.66		86.998
15000	14	0.00703079	70.31		77.7629
15000	15	0.00630673	63.07		69.7554
15000	16	0.00567602	56.76		62.7766
15000	17	0.00512424	51.24		56.6714
15000	18	0.00463956	46.4		51.3184
15000	19	0.00421224	42.12		46.5847
15000	20	0.00383418	38.34		42.404
15000	21	0.00349863	34.99		38.6989
15000	22	0.0031999	32		35.392
15000	23	0.00293319	29.33		32.439
15000	24	0.00269441	26.94		29.7956
15000	25	0.0024801	24.8		27.4288
15000	26	0.00228727	22.87		25.2942
15000	27	0.00211336	21.13		23.3698
15000	28	0.00195617	19.56		21.6334
15000	29	0.00181379	18.14		20.0628
15000	30	0.00168455	16.85		18.6361
15000	31	0.00156702	15.67		17.331
15000	32	0.00145992	14.6		16.1476
15000	33	0.00136215	13.62		15.0637
15000	34	0.00127275	12.73		14.0794
15000	35	0.00119085	11.91		13.1725
15000	36	0.0011157	11.16		12.343
15000	37	0.00104664	10.47		11.5798
15000	38	0.000983074	9.83		10.872
15000	39	0.000924474	9.24		10.2194
15000	40	0.000870376	8.7		9.6222
15000	41	0.000820363	8.2		9.0692
15000	42	0.000774063	7.74		8.56044
15000	43	0.000731143	7.31		8.08486
15000	44	0.000691305	6.91		7.64246
15000	45	0.000654281	6.54		7.23324
15000	46	0.00061983	6.2		6.8572
15000	47	0.000587734	5.88		6.50328
15000	48	0.000557798	5.58		6.17148
15000	49	0.000529845	5.3		5.8618
15000	50	0.000503715	5.04		5.57424
15000	51	0.000479262	4.79		5.29774
15000	52	0.000456356	4.56		5.04336
15000	53	0.000434876	4.35		4.8111
15000	54	0.000414714	4.15		4.5899
15000	55	0.00039577	3.96		4.37976
15000	56	0.000377954	3.78		4.18068
15000	57	0.000361184	3.61		3.99266
15000	58	0.000345384	3.45		3.8157
15000	59	0.000330484	3.3		3.6498
15000	60	0.000316422	3.16		3.49496
15000	61	0.000303139	3.03		3.35118
15000	62	0.000290583	2.91		3.21846
15000	63	0.000278703	2.79		3.08574
15000	64	0.000267456	2.67		2.95302
15000	65	0.000256798	2.57		2.84242
15000	66	0.000246692	2.47		2.73182
15000	67	0.000237103	2.37		2.62122
15000	68	0.000227997	2.28		2.52168
15000	69	0.000219344	2.19		2.42214
15000	70	0.000211117	2.11		2.33366
15000	71	0.000203289	2.03		2.24518
15000	72	0.000195837	1.96		2.16776
15000	73	0.000188737	1.89		2.09034
15000	74	0.00018197	1.82		2.01292
15000	75	0.000175515	1.76		1.94656
15000	76	0.000169355	1.69		1.86914
15000	77	0.000163472	1.63		1.80278
15000	78	0.000157853	1.58		1.74748
15000	79	0.000152481	1.52		1.68112
15000	80	0.000147343	1.47		1.62582
15000	81	0.000142427	1.42		1.57052
15000	82	0.00013772	1.38		1.52628
15000	83	0.000133212	1.33		1.47098
15000	84	0.000128892	1.29		1.42674
15000	85	0.00012475	1.25		1.3825
15000	86	0.000120777	1.21		1.33826
15000	87	0.000116965	1.17		1.29402
15000	88	0.000113305	1.13		1.24978
15000	89	0.000109791	1.1		1.2166
15000	90	0.000106414	1.06		1.17236
15000	91	0.000103168	1.03		1.13918
15000	92	0.000100047	1		1.106
15000	93	9.70445e-05	0.97		1.07282
15000	94	9.41554e-05	0.94		1.03964
15000	95	9.13742e-05	0.91		1.00646
15000	96	8.86959e-05	0.89		0.98434
15000	97	8.61158e-05	0.86		0.95116
15000	98	8.36295e-05	0.84		0.92904
15000	99	8.12327e-05	0.81		0.89586
15000	100	7.89215e-05	0.79		0.87374
15000	101	7.6692e-05	0.77		0.85162
15000	102	7.45408e-05	0.75		0.8295
15000	103	7.24644e-05	0.72		0.79632
15000	104	7.04597e-05	0.7		0.7742
15000	105	6.85235e-05	0.69		0.76314
15000	106	6.66531e-05	0.67		0.74102
15000	107	6.48456e-05	0.65		0.7189
15000	108	6.30985e-05	0.63		0.69678
15000	109	6.14093e-05	0.61		0.67466
15000	110	5.97756e-05	0.6		0.6636
15000	111	5.81952e-05	0.58		0.64148
15000	112	5.6666e-05	0.57		0.63042
15000	113	5.5186e-05	0.55		0.6083
15000	114	5.37532e-05	0.54		0.59724
15000	115	5.23657e-05	0.52		0.57512
15000	116	5.10219e-05	0.51		0.56406
15000	117	4.97201e-05	0.5		0.553
15000	118	4.84586e-05	0.48		0.53088
15000	119	4.7236e-05	0.47		0.51982
15000	120	4.60508e-05	0.46		0.50876
15000	121	4.49016e-05	0.45		0.4977
15000	122	4.37871e-05	0.44		0.48664
15000	123	4.2706e-05	0.43		0.47558
15000	124	4.16571e-05	0.42		0.46452
15000	125	4.06392e-05	0.41		0.45346
15000	126	3.96513e-05	0.4		0.4424
15000	127	3.86923e-05	0.39		0.43134
15000	128	3.77611e-05	0.38		0.42028
15000	129	3.68568e-05	0.37		0.40922
15000	130	3.59784e-05	0.36		0.39816
15000	131	3.51251e-05	0.35		0.3871
15000	132	3.4296e-05	0.34		0.37604
15000	133	3.34903e-05	0.33		0.36498
15000	134	3.27072e-05	0.33		0.36498
15000	135	3.19459e-05	0.32		0.35392
15000	136	3.12056e-05	0.31		0.34286
15000	137	3.04858e-05	0.3		0.3318
15000	138	2.97858e-05	0.3		0.3318
15000	139	2.91048e-05	0.29		0.32074
15000	140	2.84422e-05	0.28		0.30968
15000	141	2.77976e-05	0.28		0.30968
15000	142	2.71702e-05	0.27		0.29862
15000	143	2.65596e-05	0.27		0.29862
15000	144	2.59652e-05	0.26		0.28756
15000	145	2.53864e-05	0.25		0.2765
15000	146	2.48229e-05	0.25		0.2765
15000	147	2.42742e-05	0.24		0.26544
15000	148	2.37397e-05	0.24		0.26544
15000	149	2.32191e-05	0.23		0.25438
15000	150	2.27118e-05	0.23		0.25438
15000	151	2.22176e-05	0.22		0.24332
15000	152	2.1736e-05	0.22		0.24332
15000	153	2.12667e-05	0.21		0.23226
15000	154	2.08092e-05	0.21		0.23226
15000	155	2.03632e-05	0.2		0.2212
15000	156	1.99284e-05	0.2		0.2212
15000	157	1.95045e-05	0.2		0.2212
15000	158	1.9091e-05	0.19		0.21014
15000	159	1.86878e-05	0.19		0.21014
15000	160	1.82946e-05	0.18		0.19908
15000	161	1.79109e-05	0.18		0.19908
15000	162	1.75367e-05	0.18		0.19908
15000	163	1.71715e-05	0.17		0.18802
15000	164	1.68152e-05	0.17		0.18802
15000	165	1.64674e-05	0.16		0.17696
15000	166	1.6128e-05	0.16		0.17696
15000	167	1.57967e-05	0.16		0.17696
15000	168	1.54733e-05	0.15		0.1659
15000	169	1.51576e-05	0.15		0.1659
15000	170	1.48493e-05	0.15		0.1659
15000	171	1.45483e-05	0.15		0.1659
15000	172	1.42543e-05	0.14		0.15484
15000	173	1.39672e-05	0.14		0.15484
15000	174	1.36868e-05	0.14		0.15484
15000	175	1.34128e-05	0.13		0.14378
15000	176	1.31452e-05	0.13		0.14378
15000	177	1.28837e-05	0.13		0.14378
15000	178	1.26282e-05	0.13		0.14378
15000	179	1.23786e-05	0.12		0.13272
15000	180	1.21346e-05	0.12		0.13272
15000	181	1.18962e-05	0.12		0.13272
15000	182	1.16631e-05	0.12		0.13272
15000	183	1.14353e-05	0.11		0.12166
15000	184	1.12125e-05	0.11		0.12166
15000	185	1.09948e-05	0.11		0.12166
15000	186	1.07819e-05	0.11		0.12166
15000	187	1.05737e-05	0.11		0.12166
15000	188	1.03701e-05	0.1		0.1106
15000	189	1.0171e-05	0.1		0.1106
15000	190	9.9763e-06	0.1		0.1106
15000	191	9.78583e-06	0.1		0.1106
15000	192	9.59952e-06	0.1		0.1106
15000	193	9.41725e-06	0.09		0.09954
15000	194	9.23893e-06	0.09		0.09954
15000	195	9.06446e-06	0.09		0.09954
15000	196	8.89374e-06	0.09		0.09954
15000	197	8.72669e-06	0.09		0.09954
15000	198	8.56321e-06	0.09		0.09954
15000	199	8.40322e-06	0.08		0.08848
15000	200	8.24662e-06	0.08		0.08848
X-Ray fluorescence correction on Ti-in-zircon for zircon-ilmenite pair at (15 KV).
Characteristic	line:	22	K	L3
E0	(eV)	=	15000		ZAF=1.1060
E(eV)	d(mum)	K-rat (%)	K-rat (ppm)		Con(ppm)
15000	1	0.29611	2961.1		3274.98
15000	2	0.234791	2347.91		2596.79
15000	3	0.193021	1930.21		2134.81
15000	4	0.162125	1621.25		1793.1
15000	5	0.138238	1382.38		1528.91
15000	6	0.119232	1192.32		1318.71
15000	7	0.103794	1037.94		1147.96
15000	8	0.091053	910.53		1007.05
15000	9	0.0804048	804.048		889.277
15000	10	0.071412	714.12		789.817
15000	11	0.0637496	637.496		705.071
15000	12	0.0571708	571.708		632.309
15000	13	0.0514842	514.842		569.415
15000	14	0.0465395	465.395		514.727
15000	15	0.0422168	422.168		466.918
15000	16	0.0384195	384.195		424.92
15000	17	0.0350689	350.689		387.862
15000	18	0.0321003	321.003		355.029
15000	19	0.0294602	294.602		325.83
15000	20	0.027104	271.04		299.77
15000	21	0.0249942	249.942		276.436
15000	22	0.0230992	230.992		255.477
15000	23	0.0213923	213.923		236.599
15000	24	0.0198505	198.505		219.547
15000	25	0.0184542	184.542		204.103
15000	26	0.0171867	171.867		190.085
15000	27	0.0160332	160.332		177.327
15000	28	0.0149813	149.813		165.693
15000	29	0.01402	140.2		155.061
15000	30	0.0131395	131.395		145.323
15000	31	0.0123317	123.317		136.389
15000	32	0.0115891	115.891		128.175
15000	33	0.0109052	109.052		120.612
15000	34	0.0102742	102.742		113.633
15000	35	0.00969127	96.9127		107.185
15000	36	0.00915172	91.5172		101.218
15000	37	0.00865161	86.5161		95.6868
15000	38	0.00818738	81.8738		90.5524
15000	39	0.00775583	77.5583		85.7795
15000	40	0.00735412	73.5412		81.3366
15000	41	0.00697969	69.7969		77.1954
15000	42	0.00663024	66.3024		73.3305
15000	43	0.00630372	63.0372		69.7191
15000	44	0.00599824	59.9824		66.3405
15000	45	0.00571212	57.1212		63.176
15000	46	0.00544385	54.4385		60.209
15000	47	0.00519204	51.9204		57.424
15000	48	0.00495542	49.5542		54.8069
15000	49	0.00473287	47.3287		52.3455
15000	50	0.00452334	45.2334		50.0281
15000	51	0.00432588	43.2588		47.8442
15000	52	0.00413963	41.3963		45.7843
15000	53	0.00396379	39.6379		43.8395
15000	54	0.00379765	37.9765		42.002
15000	55	0.00364053	36.4053		40.2643
15000	56	0.00349182	34.9182		38.6195
15000	57	0.00335097	33.5097		37.0617
15000	58	0.00321745	32.1745		35.585
15000	59	0.0030908	30.908		34.1842
15000	60	0.00297057	29.7057		32.8545
15000	61	0.00285635	28.5635		31.5912
15000	62	0.00274778	27.4778		30.3904
15000	63	0.0026445	26.445		29.2482
15000	64	0.0025462	25.462		28.161
15000	65	0.00245258	24.5258		27.1255
15000	66	0.00236335	23.6335		26.1387
15000	67	0.00227827	22.7827		25.1977
15000	68	0.00219709	21.9709		24.2998
15000	69	0.0021196	21.196		23.4428
15000	70	0.00204558	20.4558		22.6241
15000	71	0.00197484	19.7484		21.8417
15000	72	0.0019072	19.072		21.0936
15000	73	0.0018425	18.425		20.3781
15000	74	0.00178057	17.8057		19.6931
15000	75	0.00172127	17.2127		19.0372
15000	76	0.00166446	16.6446		18.4089
15000	77	0.00161001	16.1001		17.8067
15000	78	0.0015578	15.578		17.2293
15000	79	0.00150771	15.0771		16.6753
15000	80	0.00145965	14.5965		16.1437
15000	81	0.0014135	14.135		15.6333
15000	82	0.00136918	13.6918		15.1431
15000	83	0.00132659	13.2659		14.6721
15000	84	0.00128566	12.8566		14.2194
15000	85	0.0012463	12.463		13.7841
15000	86	0.00120844	12.0844		13.3653
15000	87	0.00117201	11.7201		12.9624
15000	88	0.00113694	11.3694		12.5746
15000	89	0.00110317	11.0317		12.2011
15000	90	0.00107064	10.7064		11.8413
15000	91	0.0010393	10.393		11.4947
15000	92	0.00100909	10.0909		11.1605
15000	93	0.000979966	9.79966		10.8384
15000	94	0.000951875	9.51875		10.5277
15000	95	0.000924775	9.24775		10.228
15000	96	0.000898622	8.98622		9.93876
15000	97	0.000873378	8.73378		9.65956
15000	98	0.000849002	8.49002		9.38996
15000	99	0.000825459	8.25459		9.12958
15000	100	0.000802715	8.02715		8.87803
15000	101	0.000780736	7.80736		8.63494
15000	102	0.000759491	7.59491		8.39997
15000	103	0.000738951	7.38951		8.1728
15000	104	0.000719087	7.19087		7.9531
15000	105	0.000699872	6.99872		7.74058
15000	106	0.000681281	6.81281		7.53497
15000	107	0.000663289	6.63289		7.33598
15000	108	0.000645873	6.45873		7.14336
15000	109	0.00062901	6.2901		6.95685
15000	110	0.00061268	6.1268		6.77624
15000	111	0.000596862	5.96862		6.60129
15000	112	0.000581537	5.81537		6.4318
15000	113	0.000566687	5.66687		6.26756
15000	114	0.000552293	5.52293		6.10836
15000	115	0.000538339	5.38339		5.95403
15000	116	0.000524809	5.24809		5.80439
15000	117	0.000511687	5.11687		5.65926
15000	118	0.000498959	4.98959		5.51849
15000	119	0.00048661	4.8661		5.38191
15000	120	0.000474628	4.74628		5.24939
15000	121	0.000462998	4.62998		5.12076
15000	122	0.000451709	4.51709		4.9959
15000	123	0.000440748	4.40748		4.87467
15000	124	0.000430105	4.30105		4.75696
15000	125	0.000419768	4.19768		4.64263
15000	126	0.000409727	4.09727		4.53158
15000	127	0.000399972	3.99972		4.42369
15000	128	0.000390493	3.90493		4.31885
15000	129	0.00038128	3.8128		4.21696
15000	130	0.000372326	3.72326		4.11793
15000	131	0.000363621	3.63621		4.02165
15000	132	0.000355157	3.55157		3.92804
15000	133	0.000346926	3.46926		3.837
15000	134	0.000338921	3.38921		3.74847
15000	135	0.000331134	3.31134		3.66234
15000	136	0.000323559	3.23559		3.57856
15000	137	0.000316188	3.16188		3.49704
15000	138	0.000309015	3.09015		3.41771
15000	139	0.000302033	3.02033		3.34048
15000	140	0.000295237	2.95237		3.26532
15000	141	0.000288622	2.88622		3.19216
15000	142	0.00028218	2.8218		3.12091
15000	143	0.000275907	2.75907		3.05153
15000	144	0.000269798	2.69798		2.98397
15000	145	0.000263848	2.63848		2.91816
15000	146	0.000258051	2.58051		2.85404
15000	147	0.000252403	2.52403		2.79158
15000	148	0.0002469	2.469		2.73071
15000	149	0.000241538	2.41538		2.67141
15000	150	0.000236311	2.36311		2.6136
15000	151	0.000231217	2.31217		2.55726
15000	152	0.000226251	2.26251		2.50234
15000	153	0.000221409	2.21409		2.44878
15000	154	0.000216688	2.16688		2.39657
15000	155	0.000212084	2.12084		2.34565
15000	156	0.000207594	2.07594		2.29599
15000	157	0.000203214	2.03214		2.24755
15000	158	0.000198942	1.98942		2.2003
15000	159	0.000194774	1.94774		2.1542
15000	160	0.000190708	1.90708		2.10923
15000	161	0.00018674	1.8674		2.06534
15000	162	0.000182867	1.82867		2.02251
15000	163	0.000179088	1.79088		1.98071
15000	164	0.000175399	1.75399		1.93991
15000	165	0.000171798	1.71798		1.90009
15000	166	0.000168283	1.68283		1.86121
15000	167	0.000164851	1.64851		1.82325
15000	168	0.000161499	1.61499		1.78618
15000	169	0.000158226	1.58226		1.74998
15000	170	0.00015503	1.5503		1.71463
15000	171	0.000151908	1.51908		1.6801
15000	172	0.000148859	1.48859		1.64638
15000	173	0.00014588	1.4588		1.61343
15000	174	0.00014297	1.4297		1.58125
15000	175	0.000140126	1.40126		1.54979
15000	176	0.000137348	1.37348		1.51907
15000	177	0.000134633	1.34633		1.48904
15000	178	0.000131979	1.31979		1.45969
15000	179	0.000129386	1.29386		1.43101
15000	180	0.000126851	1.26851		1.40297
15000	181	0.000124373	1.24373		1.37557
15000	182	0.00012195	1.2195		1.34877
15000	183	0.000119581	1.19581		1.32257
15000	184	0.000117265	1.17265		1.29695
15000	185	0.000115001	1.15001		1.27191
15000	186	0.000112786	1.12786		1.24741
15000	187	0.00011062	1.1062		1.22346
15000	188	0.000108502	1.08502		1.20003
15000	189	0.00010643	1.0643		1.17712
15000	190	0.000104403	1.04403		1.1547
15000	191	0.00010242	1.0242		1.13277
15000	192	0.00010048	1.0048		1.11131
15000	193	9.85823e-05	0.985823		1.09032
15000	194	9.67251e-05	0.967251		1.06978
15000	195	9.49077e-05	0.949077		1.04968
15000	196	9.31292e-05	0.931292		1.03001
15000	197	9.13886e-05	0.913886		1.01076
15000	198	8.96849e-05	0.896849		0.991915
15000	199	8.80174e-05	0.880174		0.973472
15000	200	8.6385e-05	0.86385		0.955418

## Sheet: Table S5 Zrn Saturation model
Zircon saturation model
sample	unit	Zr	SIO2	TIO2	AL2O3	FE2O3	MNO	MGO	CAO	NA2O	K2O	P2O5	total mol	M	Saturation T, K	Saturation T, C
IDDP-1	LA-ICP-MS	407	75		12				2	4	3		1.71387	1.54006	1135.11	862.107
IDDP-1	model 1000 ppm	1000	75		12				2	4	3		1.71387	1.54006	1232.61	959.606
AVERAGES		703.5	75	#DIV/0!	12	#DIV/0!	#DIV/0!	#DIV/0!	2	4	3	#DIV/0!	1.71387	1.54006	1183.86	910.856	#DIV/0!
STDEV		419.314	0	#DIV/0!	0	#DIV/0!	#DIV/0!	#DIV/0!	0	0	0	#DIV/0!	0	0	68.9426	68.9426	#DIV/0!
MEDIAN		703.5	75	#NUM!	12	#NUM!	#NUM!	#NUM!	2	4	3	#NUM!	1.71387	1.54006	1183.86	910.856	#NUM!
MAX		1000	75	0	12	0	0	0	2	4	3	0	1.71387	1.54006	1232.61	959.606
MIN		407	75	0	12	0	0	0	2	4	3	0	1.71387	1.54006	1135.11	862.107
NUMBER		2	2	0	2	0	0	0	2	2	2	0	2	2	2	2
MILBTL009	Cp	121.428	70.7969	0.348906	15.3019	2.27182	0.0539646	0.595351	2.40463	4.22643	4.00008	0.140473	1.79475	1.55798	1024.68	751.68	100.14
MILBTL010	Cp	155.322	70.3883	0.445963	15.1325	2.94605	0.0659827	0.74539	2.95504	4.353	2.96782	0.190275	1.79083	1.59026	1042.8	769.799	100.19
MILBTL025	Cp	119.554	70.5396	0.342335	15.4912	2.3204	0.0548438	0.605866	2.4573	4.25348	3.93498	0.131264	1.79527	1.55189	1023.84	750.836	100.131
MILBTL027	Cp	75.3364	74.8323	0.197504	13.8453	1.34848	0.0304547	0.317547	1.74065	3.67314	4.01468	0.0785354	1.78247	1.40073	997.449	724.449	100.079
MILBTL028	Cp	119.875	70.9025	0.350405	15.2233	2.39411	0.05519	0.663366	2.5218	4.14595	3.7434	0.142642	1.7923	1.54189	1024.75	751.746	100.143
MILBTL030	Cp	131.954	70.3511	0.389651	15.4614	2.59575	0.0506191	0.693351	2.94573	4.40821	3.10423	0.161496	1.79417	1.58212	1029.8	756.802	100.161
MILBTL036	Cp	147.564	69.4518	0.43113	15.7049	2.83079	0.0547903	0.727776	2.90489	4.31193	3.58199	0.182497	1.79496	1.60665	1037.33	764.335	100.182
MILBTL037	Cp	127.933	70.6166	0.401255	15.1553	2.61125	0.0547434	0.730282	2.83246	4.29589	3.30231	0.160858	1.79247	1.58878	1026.8	753.801	100.161
MILBTL039	Cp	130.593	67.6716	0.3247	15.7608	2.68624	0.0986887	1.57843	1.18811	3.24487	7.4465	0.107072	1.80122	1.57897	1029.17	756.17	100.107
MILBTL041	Cp	62.6444	77.4968	0.0599755	12.7148	0.490098	0.0151487	0.0235808	0.678261	3.80997	4.71131	0.0109092	1.78401	1.37046	985.354	712.354	100.011
MILBTL042A	Cp	75.7062	76.4883	0.167788	12.6327	1.01246	0.0227695	0.179657	1.00411	2.83006	5.66218	0.0556531	1.77255	1.39003	998.53	725.53	100.056
MILBTL042B	Cp	161.819	70.9439	0.376707	14.8879	2.83203	0.0751788	0.691513	2.1947	4.40008	3.59796	0.129265	1.79228	1.54151	1049.79	776.793	100.129
MILBTL043	Cp	84.1529	73.3352	0.222608	14.5055	1.46611	0.0362184	0.360652	1.94526	3.98867	4.13979	0.0742158	1.78984	1.47364	1001.22	728.219	100.074
MILBTL046	Cp	121.644	71.7096	0.326785	15.0021	2.10546	0.0505211	0.516376	2.29926	4.30636	3.68353	0.12026	1.79338	1.52729	1026.95	753.953	100.12
MILBTL048	Cp	146.307	70.0336	0.415204	15.3525	2.47376	0.0702087	0.695492	2.70538	4.46211	3.79172	0.162652	1.79796	1.64376	1034	761.001	100.163
MILBTL055	Cp	180.494	69.2875	0.516323	15.3262	3.41812	0.0658998	0.797563	3.12737	4.291	3.1701	0.20324	1.78993	1.63793	1052.13	779.127	100.203
MILBTL056	Cp	136.521	70.779	0.414907	14.9859	2.83154	0.0597367	0.772383	3.06102	4.23814	2.85737	0.17064	1.7888	1.58342	1032.52	759.516	100.171
MILBTL058	Cp	140.306	69.9716	0.430023	15.2567	2.94934	0.059142	0.773066	2.93678	4.15502	3.46829	0.181676	1.79057	1.605	1033.26	760.26	100.182
MILBTL068	Cp	137.907	69.758	0.414545	15.4909	2.76271	0.0544493	0.706014	2.84867	4.18082	3.78391	0.164688	1.79307	1.61013	1031.48	758.475	100.165
MILBTL069	Cp	145.106	70.1308	0.442074	15.3462	2.82461	0.0569958	0.725477	2.99899	4.37161	3.10324	0.175081	1.79259	1.60116	1036.32	763.323	100.175
MILBTL081	Cp	156.128	68.9355	0.475307	15.7546	3.12164	0.0658993	0.806263	3.10711	4.27221	3.57642	0.197688	1.79606	1.64403	1039.39	766.394	100.313
MILBTL082	Cp	154.035	70.1399	0.468774	15.1017	3.01069	0.0579382	0.725747	2.98382	4.03468	3.58342	0.194787	1.78998	1.61833	1040.09	767.094	100.302
MILBTL079	Cp	159.294	67.6574	0.533487	16.1959	3.49151	0.0651081	0.954114	3.44076	4.1969	3.60161	0.21291	1.79673	1.68033	1038.49	765.491	100.35
Z-63	Cp	117	70.1399	0.42253	15.1105	2.7176	0.0603614	0.814878	2.91747	4.05427	3.61162	0.150903	1.7876	1.60937	1018.14	745.143	100
Z-35	Cp	136	68.4495	0.472968	15.8293	3.03149	0.0603789	0.875494	3.11958	4.36741	3.61267	0.181137	1.79376	1.66749	1026.33	753.331	100
Z-10	Cp	123	69.8477	0.403627	15.5195	2.49371	0.0504534	0.776983	2.75476	4.34909	3.66292	0.14127	1.79419	1.60357	1022.58	749.577	100
Z-36	Cp	123	70.4062	0.382806	15.4331	2.3239	0.0503693	0.674948	2.80053	4.46272	3.32437	0.141034	1.79415	1.5901	1023.51	750.506	100
Z-11	Cp	126	70.2336	0.372512	15.5952	2.31132	0.0503394	0.66448	2.53711	4.35939	3.74525	0.130882	1.79468	1.55893	1027.63	754.632	100
Z-37	Cp	131	70.6165	0.392986	15.2559	2.47904	0.0604594	0.715436	2.81136	4.65537	2.86174	0.151148	1.79411	1.58722	1028.85	755.85	100
Z-38	Cp	112	72.0293	0.282033	14.8571	1.7819	0.0503631	0.493558	2.08503	4.09956	4.22043	0.100726	1.79134	1.51876	1020.83	747.83	100
Z-12	Cp	59	75.2688	0.13106	13.9125	0.878268	0.0201631	0.191549	1.53239	4.204	3.83099	0.0302446	1.78988	1.42186	977.615	704.615	100
Z-40	Cp	130	70.7857	0.382952	15.1468	2.36734	0.0604661	0.634894	2.48919	4.42411	3.57758	0.13101	1.79299	1.57473	1029.09	756.093	100
Z-13	Cp	116	71.1644	0.333157	15.2041	2.05182	0.0504783	0.615836	2.43306	4.37142	3.65463	0.121148	1.79404	1.55088	1021.46	748.459	100
Z-14	Cp	125	70.1523	0.383015	15.4617	2.37443	0.0604761	0.705555	2.70832	4.3442	3.66888	0.141111	1.79388	1.59375	1024.57	751.566	100
Z-41	Cp	122	68.3726	0.553176	15.9818	3.16399	0.0603465	0.985659	3.59062	4.39524	2.70553	0.191097	1.79102	1.643	1019.21	746.21	100
Z-33	Cp	127	67.9152	0.534051	15.7092	3.30645	0.0604587	1.0278	3.47637	4.11119	3.65775	0.201529	1.78986	1.71769	1017.34	744.336	100
Z-9	Cp	127	68.9322	0.465895	15.7898	2.56716	0.0607689	0.911534	3.32203	4.16267	3.60562	0.182307	1.79292	1.66158	1021.18	748.176	100
Z-34	Cp	116	69.6409	0.452018	15.2883	2.84628	0.0602691	0.853812	3.13399	4.13848	3.41525	0.170762	1.78841	1.635	1015.71	742.708	100
Z-20	Cp	113	69.827	0.393193	15.5967	2.49825	0.0504093	0.735976	2.93382	4.29488	3.50849	0.16131	1.79271	1.60164	1015.88	742.881	100
MILBTL018	Cp	206.467	60.1491	0.84314	17.6825	6.4888	0.170958	2.08295	4.48268	5.41169	2.68813	0.405366	1.81285	2.04382	1034.36	761.364	100.405
MILBTL031A	Cp	1473.8	49.9064	2.94215	10.3758	24.2597	0.390442	2.21017	4.26483	2.51315	3.13745	0.522107	1.66733	2.95726	1143.37	870.374	100.522
MILBTL031B	Cp	425.254	62.1488	1.18175	14.7241	8.54695	0.171565	2.15505	3.47188	3.78931	3.81066	0.402591	1.7734	1.941	1106.2	833.204	100.403
AVERAGES		125.503	70.6667	0.38088	15.1621	2.46123	0.0548988	0.69394	2.61353	4.18576	3.73053	0.145549	1.79184	1.57594	1024.26	751.258
STDEV		26.1363	2.17897	0.107943	0.749708	0.674099	0.0147698	0.258503	0.662145	0.328014	0.796817	0.0469868	0.00467472	0.0775122	15.4615	15.4615
MEDIAN		127	70.2336	0.393193	15.3019	2.56716	0.0569958	0.715436	2.81136	4.27221	3.61162	0.151148	1.79271	1.5901	1026.33	753.331
MAX		180.494	77.4968	0.553176	16.1959	3.49151	0.0986887	1.57843	3.59062	4.65537	7.4465	0.21291	1.80122	1.71769	1052.13	779.127
MIN		59	67.6574	0.0599755	12.6327	0.490098	0.0151487	0.0235808	0.678261	2.83006	2.70553	0.0109092	1.77255	1.37046	977.615	704.615
																42

## Sheet: Table S6 Ti and TE in Zircon
SAMPLE	NUMBER	Ti WT%	Zr WT%		Si WT%	Al WT%	Mg WT%	Fe WT%	Ca WT%	Na WT%	K WT%	O WT%	TOTAL	TiO2	ZrO2	SiO2	Al2O3	MgO	FeO	CaO	Na2O	K2O	O	TOTAL	Ti CDL99	Zr CDL99	Si CDL99	Al CDL99	Mg CDL99	Fe CDL99	Ca CDL99	Na CDL99	K CDL99	TiO2 CDL99	ZrO2 CDL99	SiO2 CDL99	Al2O3 CDL99	MgO CDL99	FeO CDL99	CaO CDL99	Na2O CDL99	K2O CDL99	X-POS	Y-POS	Z-POS	RELDIST	BEAMCURR	Ti ppm	T(K)
IDDP-1 (EPMA)
zircon-1 core	4	0.018506	48.4107		15.5932	0.005089	0.016348	0.396451	-0.03059	-0.05306	0.021006	34.8636	99.2413	0.030868	65.3932	33.3594	0.009615	0.02711	0.510033	-0.0428	-0.07153	0.025304	0	99.2413	0.006219	0.009651	0.009227	0.007736	0.009823	0.031386	0.042619	0	0	0.010373	0.013037	0.019739	0.014616	0.016289	0.040378	0.059633	0	0	-8809	29048	-20	0	50.2487	185.06	1393.85
zircon-1 core	4	0.021941	47.7322		15.5861	0.012678	-0.00226	0.459031	0.037431	-0.03048	0.003406	34.6636	98.4837	0.036599	64.4767	33.3443	0.023956	-0.00374	0.590542	0.052374	-0.04108	0.004102	-1e-05	98.4837	0.006104	0.009693	0.009304	0.008077	0.010306	0.033021	0.030072	0	0	0.010181	0.013093	0.019905	0.015262	0.017091	0.042482	0.042076	0	0	-8797	29046	-20	12.2462	50.1724	219.41	1424.44
zircon-1 core	4	0.021408	47.8855		15.5585	0.003388	0.010178	0.397259	0.016542	-0.00451	0.023961	34.6727	98.5848	0.035709	64.6837	33.2851	0.006402	0.016878	0.511073	0.023146	-0.00608	0.028864	0	98.5848	0.006132	0.009574	0.00923	0.007981	0.009889	0.031214	0.034967	0	0	0.010229	0.012932	0.019745	0.015081	0.016399	0.040156	0.048926	0	0	-8797	29044	-20	14.2462	50.2487	214.08	1419.94
zircon-1 core	4	0.020048	47.4877		15.5528	0.000987	0.011877	0.408857	0.017592	-0.01185	0	34.521	98.009	0.033442	64.1464	33.273	0.001866	0.019695	0.525993	0.024614	-0.01598	0	-1e-05	98.009	0.00621	0.009606	0.009538	0.007897	0.009942	0.032384	0.030785	0	0	0.010358	0.012975	0.020406	0.014922	0.016488	0.041662	0.043074	0	0	-8802	29044	-20	19.2462	50.2487	200.48	1408.07
zircon-1 core	4	0.019266	48.3469		15.6433	0.007808	0.004605	0.376834	0.017385	0.006394	0.010174	34.9255	99.3581	0.032136	65.307	33.4666	0.014753	0.007636	0.484796	0.024326	0.008618	0.012255	0	99.3581	0.006184	0.009662	0.009377	0.007853	0.010216	0.031263	0.036226	0	0	0.010315	0.013051	0.020061	0.014838	0.016941	0.04022	0.050688	0	0	-8807	29044	-20	24.2462	50.2487	192.66	1400.97
zircon-1 rim	5	0.023429	48.3029		15.5682	0.004901	0.011188	0.434785	0.072024	-0.0588	0.016721	34.8461	99.2215	0.039081	65.2476	33.3061	0.00926	0.018554	0.55935	0.100777	-0.07926	0.020142	-1e-05	99.2215	0.006204	0.009741	0.009195	0.007648	0.00962	0.031047	0.021091	0	0	0.010349	0.013159	0.019672	0.01445	0.015953	0.039942	0.029511	0	0	-8828	29049	-20	0	50.1419	234.29	1436.59
zircon-1 rim	5	0.021877	47.4728		15.428	0.008711	0.006552	0.393394	-0.01938	-0.01271	0.012311	34.3612	97.6727	0.036492	64.1262	33.006	0.016459	0.010865	0.5061	-0.02711	-0.01714	0.01483	4e-06	97.6727	0.006444	0.010099	0.00951	0.008011	0.010407	0.033315	0.043906	0	0	0.010749	0.013641	0.020346	0.015137	0.017259	0.04286	0.061433	0	0	-8825	29037	-20	12.3693	46.5865	218.77	1423.9
zircon-1 rim	5	0.023163	47.67		15.5107	0.001097	0.009116	0.569776	0.016315	-0.03	0.000247	34.5767	98.3472	0.038637	64.3927	33.183	0.002072	0.015117	0.733015	0.022827	-0.04045	0.000298	8e-06	98.3472	0.006533	0.010099	0.009597	0.008165	0.010216	0.032865	0.034678	0	0	0.010897	0.013641	0.020531	0.015427	0.016942	0.042281	0.048521	0	0	-8818	29065	-20	60.6356	46.6933	231.63	1434.46
zircon-1 rim	5	0.023265	48.4549		15.6883	0.008028	0.010363	0.692788	0.016691	-0.07885	0.022697	35.0844	99.9226	0.038807	65.4529	33.5629	0.015168	0.017185	0.89127	0.023354	-0.10629	0.027341	0	99.9226	0.006159	0.009639	0.009281	0.007919	0.009769	0.031151	0.03972	0	0	0.010273	0.01302	0.019856	0.014963	0.0162	0.040075	0.055576	0	0	-8781	29048	-20	111.794	49.623	232.65	1435.28
zircon-1 rim	5	0.023247	47.4301		16.3765	0.162301	0.012079	0.62662	0.033935	0.003648	0.167054	35.6935	100.529	0.038778	64.0685	35.0351	0.306664	0.02003	0.806145	0.047482	0.004917	0.201232	0	100.529	0.006201	0.009693	0.00932	0.007837	0.010178	0.031437	0.036646	0	0	0.010344	0.013093	0.019939	0.014808	0.016878	0.040444	0.051275	0	0	-8775	29036	-20	125.21	49.6383	232.47	1435.13
zircon-3 core	10	0.010528	44.4188		14.9909	0.039948	0.006503	0.204747	0.241192	-0.23099	0	32.7836	92.4653	0.017561	60.001	32.071	0.075481	0.010784	0.263407	0.337476	-0.31137	0	4e-06	92.4653	0.006363	0.009711	0.009648	0.008513	0.010123	0.031355	0.042444	0	0	0.010613	0.013117	0.02064	0.016085	0.016786	0.040338	0.059388	0	0	-8172	28384	-23	0	49.8214	105.28	1301.29
zircon-3 core	10	0.014493	46.808		15.5337	0.001579	0.010239	0.10787	-0.03912	-0.16826	0	34.0932	96.3617	0.024174	63.2283	33.2321	0.002984	0.016979	0.138775	-0.05473	-0.22682	0	4e-06	96.3617	0.006263	0.009579	0.009496	0.008202	0.009889	0.031253	0.045639	0	0	0.010448	0.01294	0.020316	0.015497	0.016399	0.040207	0.063858	0	0	-8184	28384	-23	12	49.8367	144.93	1352.17
zircon-3 core	10	0.015873	45.8547		15.0217	0.004442	0.005677	0.662286	-0.0092	-0.13034	0	33.3599	94.7849	0.026477	61.9405	32.1367	0.008394	0.009414	0.852028	-0.01288	-0.17569	0	-1e-05	94.7849	0.0063	0.009588	0.009254	0.008278	0.010122	0.032452	0.041314	0	0	0.010509	0.012951	0.019797	0.015642	0.016786	0.041749	0.057806	0	0	-8179	28384	-22	17	49.8367	158.73	1367.39
zircon-3 rim	11	0.016477	47.3833		15.5351	0.001891	0.000924	0.086559	-0.04457	-0.16358	0	34.2855	97.1016	0.027485	64.0054	33.2352	0.003574	0.001532	0.111357	-0.06236	-0.2205	0	0	97.1016	0.006234	0.009703	0.00933	0.008128	0.0102	0.032219	0.044602	0	0	0.010398	0.013107	0.01996	0.015358	0.016915	0.041449	0.062407	0	0	-8180	28404	-22	0	49.8214	164.77	1373.74
zircon-3 rim	11	0.019768	47.4277		15.5565	0.001211	0.007534	0.052588	0.004696	-0.14409	0	34.348	97.2739	0.032974	64.0653	33.2808	0.002288	0.012493	0.067655	0.00657	-0.19423	0	4e-06	97.2739	0.006285	0.009737	0.009364	0.007794	0.009693	0.032251	0.036572	0	0	0.010483	0.013152	0.020032	0.014726	0.016074	0.041491	0.051171	0	0	-8202	28395	-22	23.7697	49.8214	197.68	1405.55
zircon-3 rim	11	0.021175	46.3013		15.4427	-0.00701	0.005952	0.068899	-0.01332	-0.15739	0	33.8088	95.4711	0.035322	62.5438	33.0375	-0.01324	0.00987	0.088638	-0.01863	-0.21215	0	0	95.4711	0.006188	0.009732	0.009514	0.008365	0.010051	0.033096	0.041927	0	0	0.010321	0.013146	0.020354	0.015806	0.016668	0.042578	0.058664	0	0	-8206	28388	-22	31.832	49.8367	211.75	1417.95
zircon-3 rim	11	0.01918	46.3324		15.5016	0.015186	0.014141	0.083786	-0.0008	-0.15374	0	33.9211	95.7328	0.031994	62.5859	33.1634	0.028694	0.02345	0.107791	-0.00112	-0.20723	0	4e-06	95.7328	0.006311	0.009682	0.009651	0.008162	0.009952	0.031298	0.039575	0	0	0.010528	0.013078	0.020647	0.015423	0.016504	0.040265	0.055374	0	0	-8187	28368	-22	59.4182	49.8367	191.8	1400.17
IDDP-1 and Viti zircons (IOLITE-based LA-ICP-MS data)
	Source file	DateTime	Date	Time	Duration(s)	Comments	Si29_CPS	Si29_CPS_Int2SE	Si29_CPS_LOD	Al_ppm_m27	Al_ppm_m27_Int2SE	Al_ppm_m27_LOD	P_ppm_m31	P_ppm_m31_Int2SE	P_ppm_m31_LOD	Ca_ppm_m43	Ca_ppm_m43_Int2SE	Ca_ppm_m43_LOD	Ti_ppm_m49	Ti_ppm_m49_Int2SE	Ti_ppm_m49_LOD	Fe_ppm_m57	Fe_ppm_m57_Int2SE	Fe_ppm_m57_LOD	Y_ppm_m89	Y_ppm_m89_Int2SE	Y_ppm_m89_LOD	Zr_ppm_m91	Zr_ppm_m91_Int2SE	Zr_ppm_m91_LOD	Nb_ppm_m93	Nb_ppm_m93_Int2SE	Nb_ppm_m93_LOD	La_ppm_m139	La_ppm_m139_Int2SE	La_ppm_m139_LOD	Ce_ppm_m140	Ce_ppm_m140_Int2SE	Ce_ppm_m140_LOD	Pr_ppm_m141	Pr_ppm_m141_Int2SE	Pr_ppm_m141_LOD	Nd_ppm_m146	Nd_ppm_m146_Int2SE	Nd_ppm_m146_LOD	Sm_ppm_m147	Sm_ppm_m147_Int2SE	Sm_ppm_m147_LOD	Eu_ppm_m153
IDDP_1_1	006_IDDP1_Zr3.FIN2	29/11/2022 (3) 10:22:03.82	29/11/2022 (3)	10:22:03.820000	6.5501	006_IDDP1_Zr3.FIN2	1408000	59000	0	4710	560	14.023	288	37	20.069	1390	290	583.71	118.6	9.8	1.0932	5580	740	26.347	4520	370	0.11962	412000	19000	4.506	279	26	0.12992	84	18	0.065798	191	44	0.073214	17.5	3.7	0.028621	72	15	0.19498	25.8	4.3	0.26079	0.84
IDDP_1_2	007_IDDP1_Zr3.FIN2	29/11/2022 (3) 10:25:31.00	29/11/2022 (3)	10:25:31	16.152	007_IDDP1_Zr3.FIN2	913000	89000	0	191	18	17.459	484	62	15.059	1700	460	533.01	42.7	5.3	1.6606	13900	1700	26.198	26100	2800	0.14712	514000	21000	7.3901	334	24	0.10485	129	19	0.085098	516	62	0.08715	22	3.5	0.047173	99	13	0	62.4	8.5	0	0.726
IDDP_1_3	008_IDDP1_Zr1.FIN2	29/11/2022 (3) 10:27:11.86	29/11/2022 (3)	10:27:11.860000	4.5032	008_IDDP1_Zr1.FIN2	1128000	76000	0	690	220	25.448	312	92	20.241	2000	1800	1092	27.2	5.4	2.3614	1900	2000	44.481	3370	120	0.22838	483000	26000	6.3074	12.2	1.5	0.2004	2.4	1.4	0.078387	20.6	1.5	0.058862	0.88	0.36	0.068699	7.2	2.6	0.18034	14.9	2.2	0.40637	1.67
IDDP_1_4	009_IDDP1_Zr1.FIN2	29/11/2022 (3) 10:30:24.00	29/11/2022 (3)	10:30:24	16.151	009_IDDP1_Zr1.FIN2	1290000	130000	0	16160	700	15.596	194	38	18.847	1370	250	326.2	276	13	1.0799	4320	220	14.566	1508	61	0.14094	180000	15000	2.5075	58.1	3.2	0.14016	25.1	1.5	0.017525	67.2	2.4	0.038003	5.68	0.28	0.099284	23.6	1.5	0.36161	8.85	0.75	0.32927	0.73
																																																average	35
	Source file	DateTime	Date	Time	Duration(s)	Comments	Si29_CPS	Si29_CPS_Int2SE	Si29_CPS_LOD	Al_ppm_m27	Al_ppm_m27_Int2SE	Al_ppm_m27_LOD	P_ppm_m31	P_ppm_m31_Int2SE	P_ppm_m31_LOD	Ca_ppm_m43	Ca_ppm_m43_Int2SE	Ca_ppm_m43_LOD	Ti_ppm_m49	Ti_ppm_m49_Int2SE	Ti_ppm_m49_LOD	Fe_ppm_m57	Fe_ppm_m57_Int2SE	Fe_ppm_m57_LOD	Y_ppm_m89	Y_ppm_m89_Int2SE	Y_ppm_m89_LOD	Zr_ppm_m91	Zr_ppm_m91_Int2SE	Zr_ppm_m91_LOD	Nb_ppm_m93	Nb_ppm_m93_Int2SE	Nb_ppm_m93_LOD	La_ppm_m139	La_ppm_m139_Int2SE	La_ppm_m139_LOD	Ce_ppm_m140	Ce_ppm_m140_Int2SE	Ce_ppm_m140_LOD	Pr_ppm_m141	Pr_ppm_m141_Int2SE	Pr_ppm_m141_LOD	Nd_ppm_m146	Nd_ppm_m146_Int2SE	Nd_ppm_m146_LOD	Sm_ppm_m147	Sm_ppm_m147_Int2SE	Sm_ppm_m147_LOD	Eu_ppm_m153
Viti_3	008_Viti_Zr11.FIN2	29/11/2022 (3) 11:41:04.00	29/11/2022 (3)	11:41:04	16.151	008_Viti_Zr11.FIN2	2240000	220000	0	51900	2600	7.9021	69	22	8.2034	1390	170	331.68	22.9	1.7	0.90856	498	47	16.709	172	45	0.1067	16600	4100	2.7565	7.3	1.8	0.038023	2.53	0.26	0.038297	4.66	0.72	0.061745	0.115	0.031	0.034107	0.44	0.16	0.13189	0.25	0.14	0	0.61
Viti_4	009_Viti_Zr11.FIN2	29/11/2022 (3) 11:41:56.00	29/11/2022 (3)	11:41:56	16.152	009_Viti_Zr11.FIN2	2040000	220000	0	52200	2200	8.8699	12	28	9.7069	1520	190	332.15	28.9	1.4	1.1872	473	39	15.832	0.071	0.054	0.096739	0.7	1.2	1.5254	0.001	0.012	0.058911	3.09	0.26	0.029145	2.09	0.2	0.058842	0.129	0.027	0	0.26	0.12	0.2134	0.008	0.015	0	0.643
Viti_5	011_Viti_Zr1.FIN2	29/11/2022 (3) 11:45:52.99	29/11/2022 (3)	11:45:52.990000	5.8693	011_Viti_Zr1.FIN2	1147000	56000	0	171	66	15.476	1460	380	25.291	2900	2000	826.42	10.3	3.4	1.8713	830	200	29.678	12600	3300	0.19367	572000	55000	5.5599	284	39	0.069721	136	98	0.10566	400	240	0.051217	17	13	0.046128	58	39	0	34	16	0	1.1
Viti_6	012_Viti_Zr1.FIN2	29/11/2022 (3) 11:47:22.85	29/11/2022 (3)	11:47:22.850000	14.335	012_Viti_Zr1.FIN2	860000	110000	0	2100	1000	21.005	1880	320	17.941	6700	1900	697.07	12.3	2.3	2.1409	1320	300	34.752	16200	3100	0.25178	500000	26000	7.3366	330	53	0.15706	730	250	0.039234	1500	500	0.046224	122	33	0.042974	480	130	0.22448	166	48	0.28031	2.36
IDDP-1 Ti-in-zircons (EPMA)
	Weight%	Weight%				Det.Lim ppm(A)			StdDev wt%																Ti ppm	106	core
	Ti	Hf	O	Zr	Si	Total	Ti	Hf	Ti	Hf	X	Y	Z	Comment	Distance (µ)	Mean Z	Point#	Date	Ti ppm		IDDP-1:				log Ti (ppm)	2.02531
11-Zrn-33-Ti	0.0043	0.8873	35.5811	49	16	101.473	7	152	0.0006	0.0231	239	-9448	192	11-Zrn-33-Ti		25.3263	14	vendredi 24 mars 2023 16:14:51	43		EPMA (Zrn cores)	Ti ppm	T(K)	T(°C)	T (K)	a	b	a(TiO2)	T°C	10^4/T
11-Zrn-32-Ti	0.0039	0.8923	35.5817	49	16	101.478	7	153	0.0006	0.0233	-13305	-8729	143	11-Zrn-32-Ti		25.3298	15	vendredi 24 mars 2023 16:27:13	39		min	35	1152	879	1302.33	5.711	4800	1	1029.33	9.71503
13-Zrn-78-Ti-1	0.0043	0.9586	35.5938	49	16	101.557	12	153	0.001	0.0241	-9108	12090	360	13-Zrn-78-Ti-1		25.3786	16	vendredi 24 mars 2023 18:17:22	43		max	106	1302	1029	1359.47	5.711	4800	0.7	1086.47	9.20413
13-Zrn-78-Ti-2	0.0042	0.9592	35.5939	49	16	101.557	11	153	0.0009	0.0242	-9118	12059	360	13-Zrn-78-Ti-2		25.3791	17	vendredi 24 mars 2023 18:29:45	42		average	53.1765	1204	931	1418.16	5.711	4800	0.5	1145.16	8.73239
13-Zrn-78-Ti-3	0.0046	0.9788	35.5977	49	16	101.581	11	153	0.0009	0.0244	-9095	12050	365	13-Zrn-78-Ti-3		25.3936	18	vendredi 24 mars 2023 18:42:07	46						Ti ppm	35	rim
13-Zrn-78-Ti-4	0.0066	0.6359	35.5375	49	16	101.18	5	144	0.0004	0.0194	-9115	12036	360	13-Zrn-78-Ti-4		25.1423	19	vendredi 24 mars 2023 18:54:37	66						log Ti (ppm)	1.54407
13-Zrn-78-Ti-5	0.0042	0.9712	35.596	49	16	101.571	9	156	0.0008	0.0244	-9090	12013	360	13-Zrn-78-Ti-5		25.3879	20	vendredi 24 mars 2023 19:06:59	42		LA-ICP-MS (Zrn rims)				T (K)	a	b	a(TiO2)	T°C	10^4/T
13-Zrn-80-Ti-1	0.0035	0.8581	35.5753	49	16	101.437	19	155	0.0016	0.0229	-9006	10747	362	13-Zrn-80-Ti-1		25.3046	21	vendredi 24 mars 2023 19:19:21	35		min	43	1177	904	1151.93	5.711	4800	1	878.927	11.3775
13-Zrn-80-Ti-2	0.0043	0.9571	35.5936	49	16	101.555	10	160	0.0009	0.0245	-8993	10735	368	13-Zrn-80-Ti-2		25.3775	22	vendredi 24 mars 2023 19:31:52	43						1196.4	5.711	4800	0.7	923.402	10.8295
13-Zrn-82-Ti	0.0049	0.984	35.5988	49	16	101.588	11	153	0.0009	0.0245	-7265	281	386	13-Zrn-82-Ti		25.3975	23	vendredi 24 mars 2023 19:44:16	49						1241.62	5.711	4800	0.5	968.625	10.3239
13-Zrn-83-Ti-1	0.0106	1.3561	35.6693	49	16	102.036	11	155	0.0009	0.0299	-4915	153	380	13-Zrn-83-Ti		25.6723	24	vendredi 24 mars 2023 19:56:40	106
13-Zrn-83-Ti-2	0.0106	1.337	35.6659	49	16	102.013	11	156	0.0009	0.0296	-4915	153	381	13-Zrn-83-Ti		25.6582	25	vendredi 24 mars 2023 20:09:11	106
13-Zrn-85-Ti-1	0.0053	0.9706	35.5967	49	16	101.573	10	155	0.0009	0.0244	1885	14216	322	13-Zrn-85-Ti-1		25.3877	26	vendredi 24 mars 2023 20:21:37	53
13-Zrn-85-Ti-2	0.0049	0.9477	35.5923	49	16	101.545	12	155	0.001	0.0241	1865	14189	322	13-Zrn-85-Ti-2		25.3708	27	vendredi 24 mars 2023 20:34:00	49
13-Zrn-56-Ti-1	0.0048	0.9268	35.5885	49	16	101.52	12	153	0.001	0.0237	-8879	20603	314	13-Zrn-56-Ti-1		25.3554	28	vendredi 24 mars 2023 20:46:32	48
13-Zrn-56-Ti-2	0.0053	0.9691	35.5964	49	16	101.571	10	153	0.0009	0.0243	-8874	20581	314	13-Zrn-56-Ti-2		25.3866	29	vendredi 24 mars 2023 20:58:55	53
13-Zrn-73-Ti-2	0.0041	0.9467	35.5916	49	16	101.542	9	158	0.0008	0.0242	-8734	15393	346	13-Zrn-73-Ti-2		25.3699	33	vendredi 24 mars 2023 21:48:37	41
Viti granophyre zircons by EPMA (France)
		Det.Lim ppm(A)							Weight%						Bg1 cnt (cps)										Ti ppm	43
	Comment	Ti	Hf	Ti wt% measured	Hf	O	Zr	Si	Total	X	Y	Z	Comment	Distance (µ)	Mean Z	Point#	Date				Viti granophyres:				log Ti (ppm)	1.63347
55 / 1 .	NI7242-Z1-1	9	286	0.0032	1.1632	35.6298	49	16	101.796	1484	-25475	166	NI7242-Z1-1		25.5286	55	vendredi 28 janvier 2022 15:30:11				EPMA	Ti ppm	T(K)	T(°C)	T (K)	a	b	a(TiO2)	T°C	10^4/T
56 / 1 .	NI7242-Z1-2	9	288	0.0043	0.999	35.6011	49	16	101.604	1509	-25495	166	NI7242-Z1-2		25.4083	56	vendredi 28 janvier 2022 15:33:49				min	23	1104	831	1177.18	5.711	4800	1	904.183	11.0597
57 / 1 .	NI7242-Z1-3	9	290	0.0037	1.1696	35.6313	49	16	101.805	1520	-25515	166	NI7242-Z1-3		25.5335	57	vendredi 28 janvier 2022 15:37:20				max	43	1177	904	1223.67	5.711	4800	0.7	950.669	10.5189
58 / 1 .	NI7242-Z1-4	9	282	0.0034	1.2261	35.6412	49	16	101.871	1529	-25484	166	NI7242-Z1-4		25.5749	58	vendredi 28 janvier 2022 15:38:45								1271.02	5.711	4800	0.5	998.018	10.0199
64 / 1 .	NI7242-Z10-5	9	283	0.0037	0.9002	35.583	49	16	101.487	9206	-36107	166	NI7242-Z10-5		25.3356	64	vendredi 28 janvier 2022 16:59:46				RSD%				Ti ppm	23
65 / 1 .	NI7242-Z10-6	9	284	0.0023	0.8944	35.581	49	16	101.478	9215	-36119	166	NI7242-Z10-6		25.331	65	vendredi 28 janvier 2022 17:01:12								log Ti (ppm)	1.36173
66 / 1 .	NI7242-Z7-Z8-Z9-1	9	279	0.0029	1.0733	35.6135	49	16	101.69	2828	-36741	178	NI7242-Z7-Z8-Z9-1		25.4625	66	vendredi 28 janvier 2022 17:02:39				LA-ICP-MS (Zrn rims)				T (K)	a	b	a(TiO2)	T°C	10^4/T
67 / 1 .	NI7242-Z7-Z8-Z9-2	9	282	0.0031	0.9954	35.5997	49	16	101.598	2841	-36753	178	NI7242-Z7-Z8-Z9-2		25.4053	67	vendredi 28 janvier 2022 17:04:05				average	23	1104	831	1103.63	5.711	4800	1	830.633	12.039
69 / 1 .	NI7242-Z7-Z8-Z9-4	9	278	0.0024	0.7906	35.5625	49	16	101.356	2811	-36772	178	NI7242-Z7-Z8-Z9-4		25.2548	69	vendredi 28 janvier 2022 17:06:56								1144.39	5.711	4800	0.7	871.391	11.4759
73 / 1 .	NI7242-Z4-3	9	278	0.0026	0.9413	35.5896	49	16	101.534	-5126	-37305	188	NI7242-Z4-3		25.3655	73	vendredi 28 janvier 2022 17:12:41								1185.7	5.711	4800	0.5	912.7	10.9565
74 / 1 .	NI7242-Z4-4	9	283	0.0026	0.8227	35.5684	49	16	101.394	-5126	-37317	188	NI7242-Z4-4		25.2784	74	vendredi 28 janvier 2022 17:14:07
79 / 1 .	NI7242-Z4-9	9	277	0.0026	0.6688	35.5408	49	16	101.212	-5138	-37318	188	NI7242-Z4-9		25.1654	79	vendredi 28 janvier 2022 17:21:17
80 / 1 .	NI7242-Z4-10	9	275	0.0032	1.1009	35.6186	49	16	101.723	-5162	-37304	188	NI7242-Z4-10		25.4829	80	vendredi 28 janvier 2022 17:22:45
[truncated: 42 more columns]

## Sheet: Table S7 Th-U dating of zircons
Table S7. U-Th activity ratios and crystallization ages for zircons from IDDP-1 rhyolite and Viti granophyre.
Sample	(238U)/(232Th)	±1 s.e.	(230Th)/(232Th)	±1 s.e.	U ppm	Model age	(+)1 sigma	(-)1 sigma	Isochron age (ka)	± 1 sigma
						(ka)
IDDP-1									0.04	2.02
ZRN-3.1	5.31	0.19	1.05	0.06	2772	0.1	2.3	2.3
ZRN-4.1	5.31	0.24	1.07	0.06	1871	0.5	2.4	2.3
ZRN-1.1	4.73	0.17	0.94	0.11	216	-3.1	3.8	3.6
ZRN-2.1	4.10	0.22	1.25	0.25	391	6.9	10.0	9.1
Viti Granophyre									1.93	2.34
VITI-Z-10.1	6.09	0.43	1.42	0.06	1356	8.3	2.3	2.3
VITI-Z7-8-9	9.78	0.35	7.69	1.21	882	151.0	89.1	48.4
VITI-Z4.1	9.82	0.37	2.01	0.16	1184	12.6	2.6	2.5
VITI-Z4.2	5.36	0.20	1.12	0.05	1310	1.9	2.4	2.3
VITI-1.2	3.66	0.15	1.11	0.09	3116	2.8	5.1	4.9
Model crystallization ages for individual analyses are derived using respective whole rock host U/Th and an assumed (230Th)/(232Th) based on a mean (230Th)/(238U) of 1.12 ± 0.05 reported by Sigmarsson et al. (1991) for Krafla and other Icelandic rhyolites. Viti granophyre: (238U)/(232Th)= 0.91 ± 0.06, (230Th/232Th)=1.04 ± 0.08; IDDP-1: (238U)/(232Th)= 0.92 ± 0.05, (230Th/232Th)=1.05 ± 0.07. Isoch…

## Sheet: Table S8 Input parameters
Parameter	Notation, units	Basalt (felsite)
Density	ρ, kg/m3	2800 (2300)
Heat capacity	C, J/kg/K	1200 (1200)
Thermal conductivity	k, W/m/K	1 (1)
Thermal expansion	β, 1/K	5x10-5 (5x10-5)
Initial temperatures	T0, oC	1100 (400)
Layer thickness	h, m	150 (0)
Latent heat	L*, J/kg	3.5x105 (3.5x105)
